# Supplementary material for: Extended shortwave infrared absorbing antiaromatic fluorenium-indolizine chromophores
Source: Royal Society of Chemistry journal article supplement (doi:10.1039/d4sc00733f), 2024-01-01
Supplement: d4sc00733f1.pdf [file d4sc00733f1.pdf]

## Supplementary Information

### Extended Shortwave Infrared Absorbing Antiaromatic Fluorenum-Indolizine Chromophores

William E. Meador,<sup>a,‡</sup> Matthew A. Saucier,<sup>a,‡</sup> Max R. Tucker,<sup>a</sup> Nicholas A. Kruse,<sup>a</sup> Alexander J. Mobley,<sup>a</sup> Connor R. Brower,<sup>a</sup> Sean R. Parkin,<sup>b</sup> Kensha M. Clark,<sup>a</sup> Nathan I. Hammer,<sup>a</sup> Gregory S. Tschumper,<sup>a</sup> and Jared H. Delcamp<sup>a,c,\*</sup>

<sup>a</sup> University of Mississippi, Department of Chemistry and Biochemistry, Coulter Hall, University, MS 38677, USA

<sup>b</sup> Department of Chemistry, University of Kentucky, Lexington, Kentucky 40506, United States

<sup>c</sup> Present Address: Air Force Research Laboratory, Materials and Manufacturing Directorate (RXNC), 2230 Tenth Street B655, Wright-Patterson AFB, OH 45433, USA

<sup>‡</sup> These authors contributed equally to this work

Corresponding author email: [delcamp@olemiss.edu](mailto:delcamp@olemiss.edu)

## TABLE OF CONTENTS

|                                                            |     |
|------------------------------------------------------------|-----|
| Photophysical Measurements . . . . .                       | 3   |
| Electrochemical Measurements. . . . .                      | 10  |
| Computational Data. . . . .                                | 13  |
| Crystallographic Data. . . . .                             | 58  |
| Paramagnetic Experiments. . . . .                          | 73  |
| Synthesis (procedures and characterization data) . . . . . | 80  |
| NMR & HRMS Spectra. . . . .                                | 87  |
| References . . . . .                                       | 120 |

## PHOTOPHYSICAL MEASUREMENTS

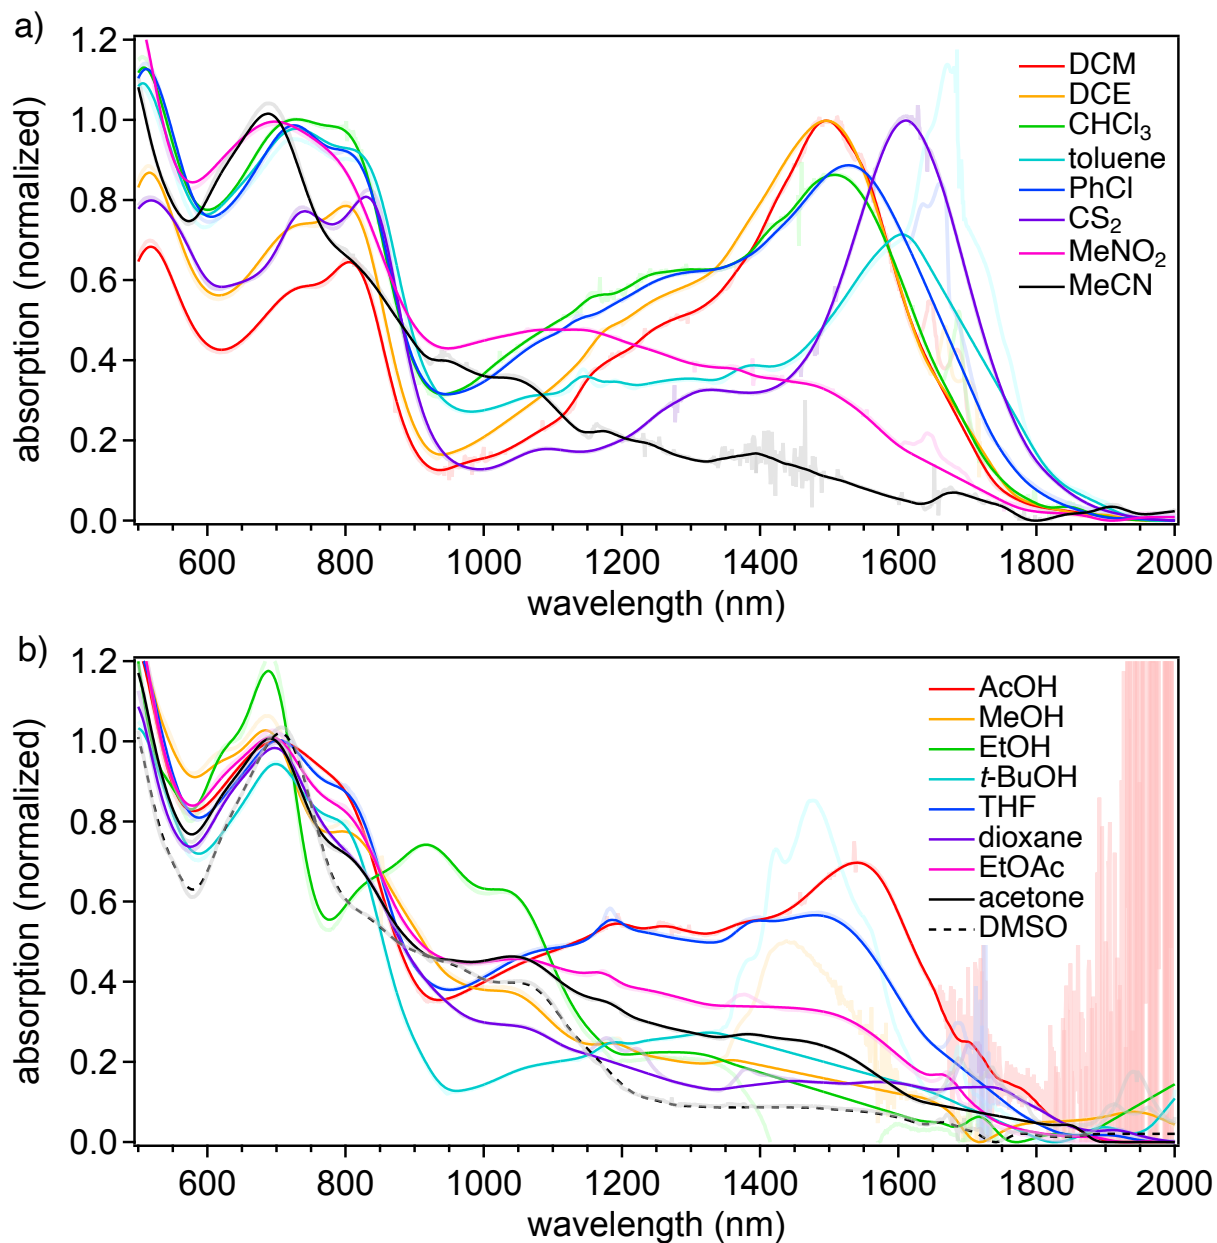

**Figure S1.** Absorption spectra of  $2^{\text{Ph}}\text{FluIndz}$  in various solvents. The absorption spectra are normalized to most intense NIR peak (>700 nm) in each spectrum. Raw spectra are included as the corresponding faded color spectrum behind each smoothed/solvent subtracted spectrum.

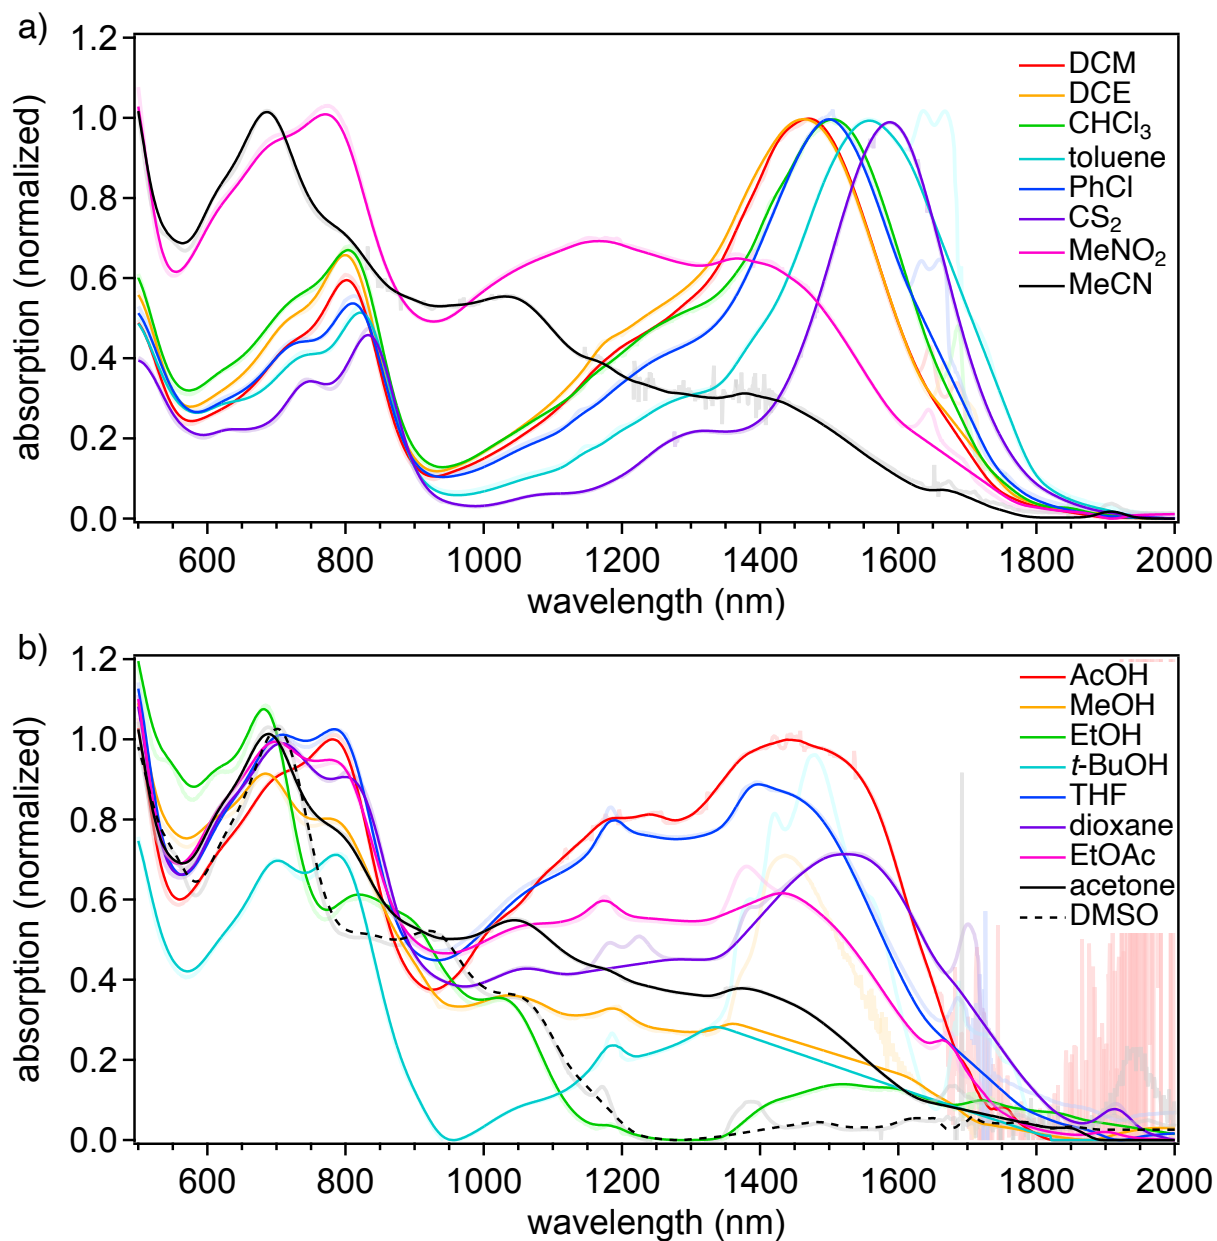

**Figure S2.** Absorption spectra of  $1^{\text{Ph}}\text{FluIndz}$  in various solvents. The absorption spectra are normalized to most intense NIR peak (>700 nm) in each spectrum. Raw spectra are included as the corresponding faded color spectrum behind each smoothed/solvent subtracted spectrum.

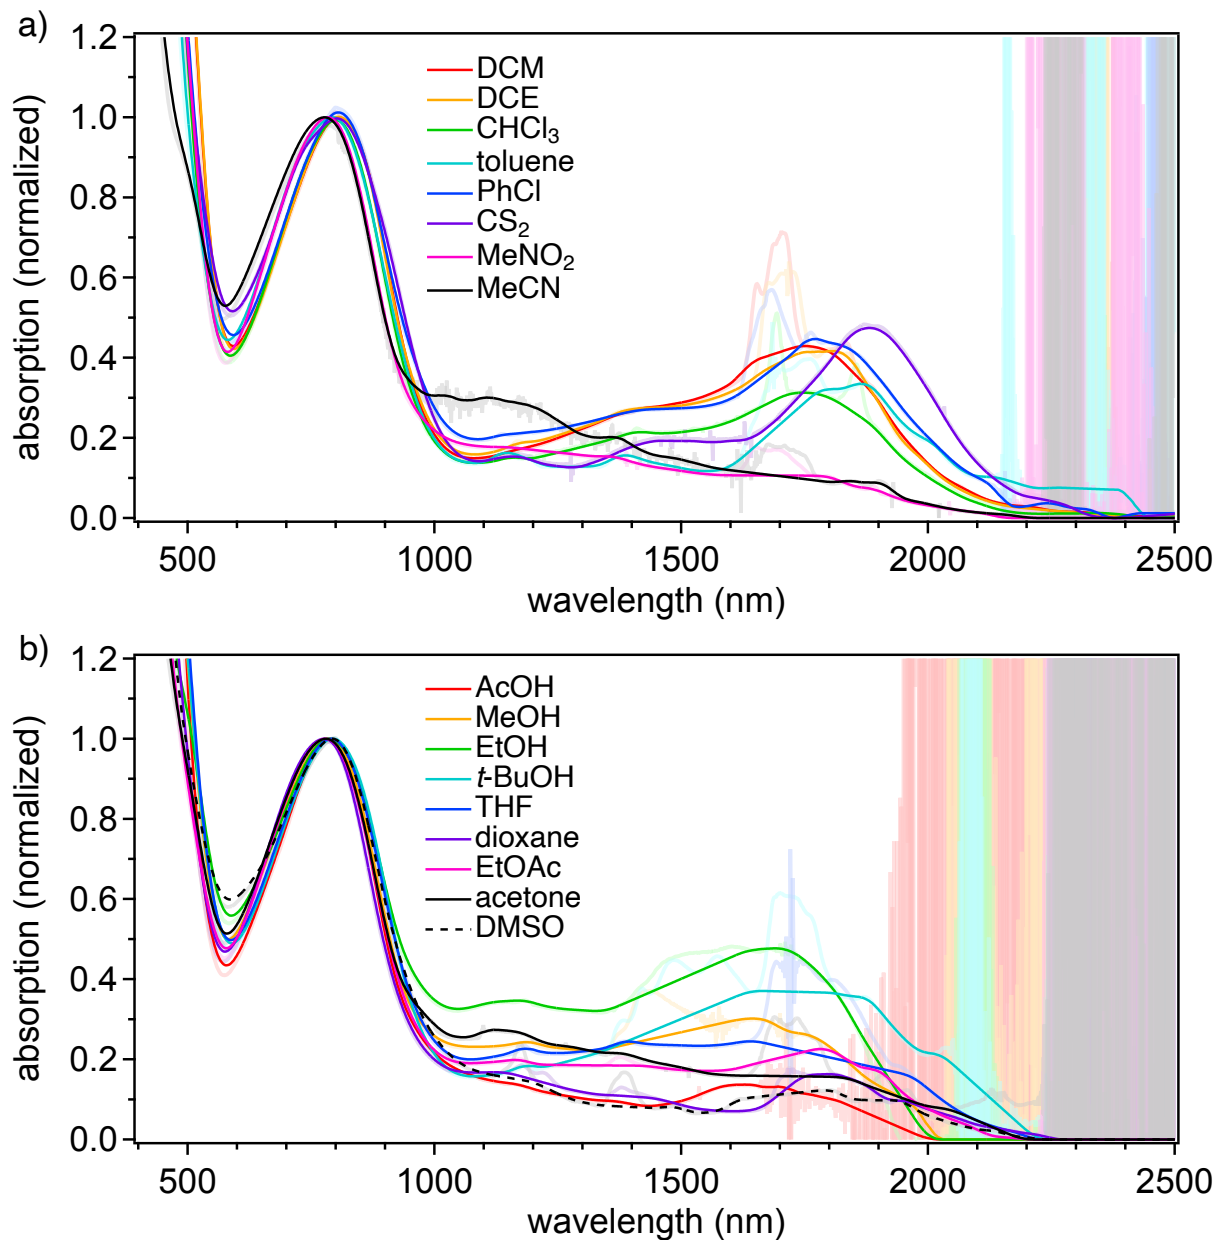

**Figure S3.** Absorption spectra of <sup>7</sup>DMA-FluIndz in various solvents. The absorption spectra are normalized to most intense NIR peak (>700 nm) in each spectrum. Raw spectra are included as the corresponding faded color spectrum behind each smoothed/solvent subtracted spectrum.

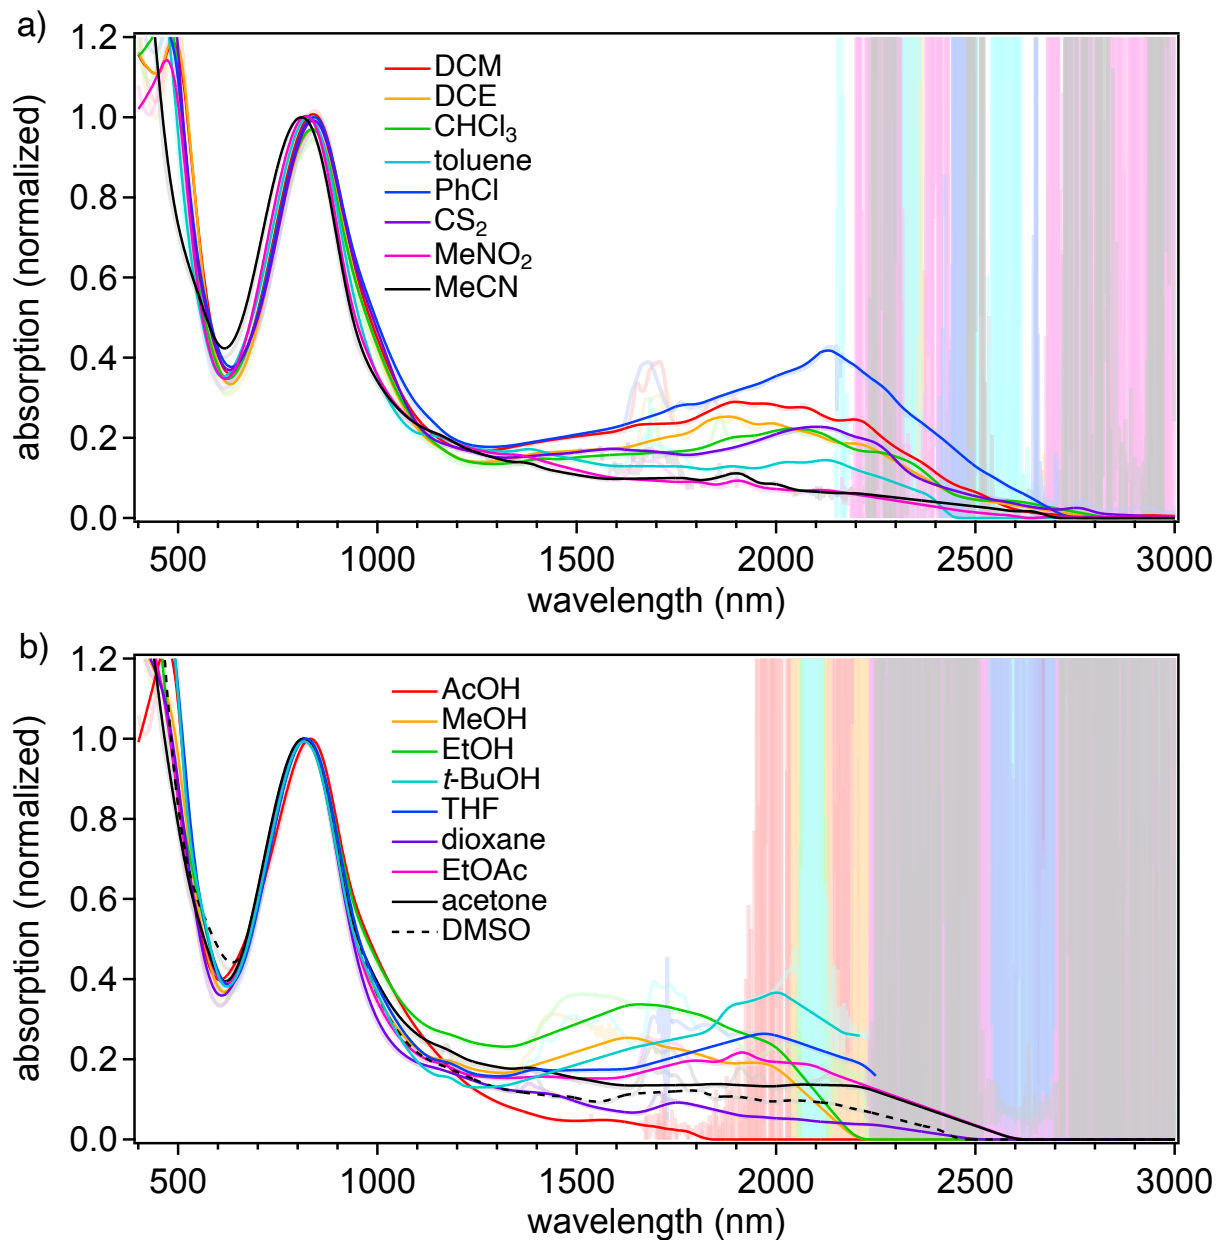

**Figure S4.** Absorption spectra of <sup>1,7</sup>DBA-FluIndz in various solvents. The absorption spectra are normalized to most intense NIR peak (>700 nm) in each spectrum. Raw spectra are included as the corresponding faded color spectrum behind each smoothed/solvent subtracted spectrum. Some spectra are truncated at the longest wavelength where dye absorption could be distinguished from solvent absorption.

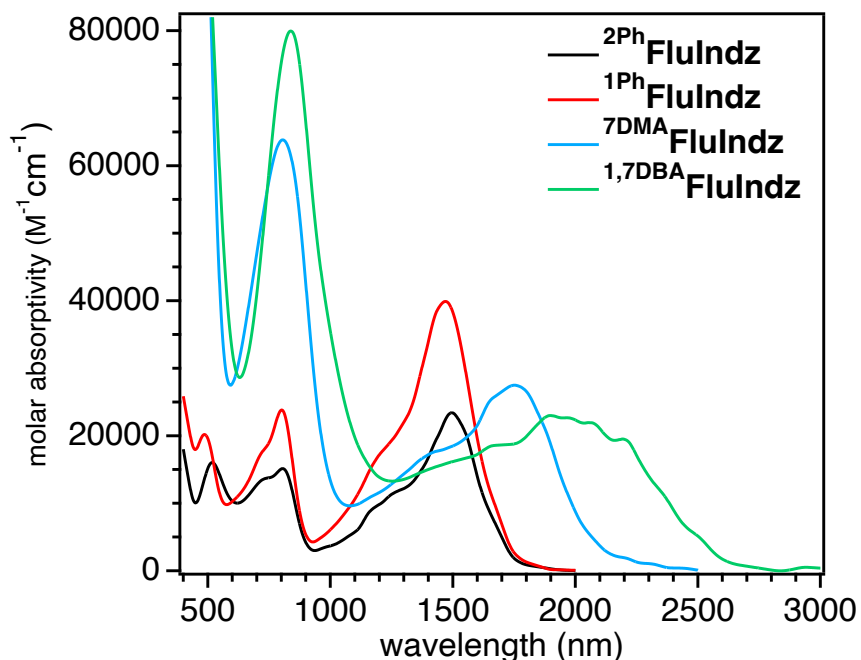

**Figure S5.** Molar absorptivity of FluIndz dyes in DCM.

**Table S1.** Molar absorptivity (in  $M^{-1} \text{ cm}^{-1}$ ) by peak wavelength in DCM.

| Dye                             | highest energy peak                    | middle peak                           | lowest energy peak                     |
|---------------------------------|----------------------------------------|---------------------------------------|----------------------------------------|
| <b><sup>2</sup>PhFluIndz</b>    | 15,400 ( $\lambda = 524 \text{ nm}$ )  | 14,900 ( $\lambda = 816 \text{ nm}$ ) | 23,400 ( $\lambda = 1500 \text{ nm}$ ) |
| <b><sup>1</sup>PhFluIndz</b>    | 19,700 ( $\lambda = 498 \text{ nm}$ )  | 23,500 ( $\lambda = 810 \text{ nm}$ ) | 39,900 ( $\lambda = 1470 \text{ nm}$ ) |
| <b><sup>7</sup>DMAFluIndz</b>   | 112,300 ( $\lambda = 475 \text{ nm}$ ) | 63,400 ( $\lambda = 819 \text{ nm}$ ) | 27,500 ( $\lambda = 1756 \text{ nm}$ ) |
| <b><sup>1,7</sup>DBAFluIndz</b> | 93,300 ( $\lambda = 495 \text{ nm}$ )  | 79,600 ( $\lambda = 849 \text{ nm}$ ) | 23,000 ( $\lambda = 1956 \text{ nm}$ ) |

**Table S2.** Molar absorptivity (in  $M^{-1} \text{ cm}^{-1}$ ) by peak wavelength in  $\text{CS}_2$ .

| Dye                             | highest energy peak                    | middle peak                                                                    | lowest energy peak                     |
|---------------------------------|----------------------------------------|--------------------------------------------------------------------------------|----------------------------------------|
| <b><sup>2</sup>PhFluIndz</b>    | 14,900 ( $\lambda = 534 \text{ nm}$ )  | 15,700 ( $\lambda = 733 \text{ nm}$ )<br>17,400 ( $\lambda = 796 \text{ nm}$ ) | 20,000 ( $\lambda = 1620 \text{ nm}$ ) |
| <b><sup>1</sup>PhFluIndz</b>    | 18,300 ( $\lambda = 508 \text{ nm}$ )  | 21,200 ( $\lambda = 840 \text{ nm}$ )                                          | 46,000 ( $\lambda = 1590 \text{ nm}$ ) |
| <b><sup>7</sup>DMAFluIndz</b>   | 139,900 ( $\lambda = 443 \text{ nm}$ ) | 68,900 ( $\lambda = 777 \text{ nm}$ )                                          | 33,000 ( $\lambda = 1882 \text{ nm}$ ) |
| <b><sup>1,7</sup>DBAFluIndz</b> | 120,200 ( $\lambda = 465 \text{ nm}$ ) | 81,300 ( $\lambda = 845 \text{ nm}$ )                                          | 18,700 ( $\lambda = 2088 \text{ nm}$ ) |

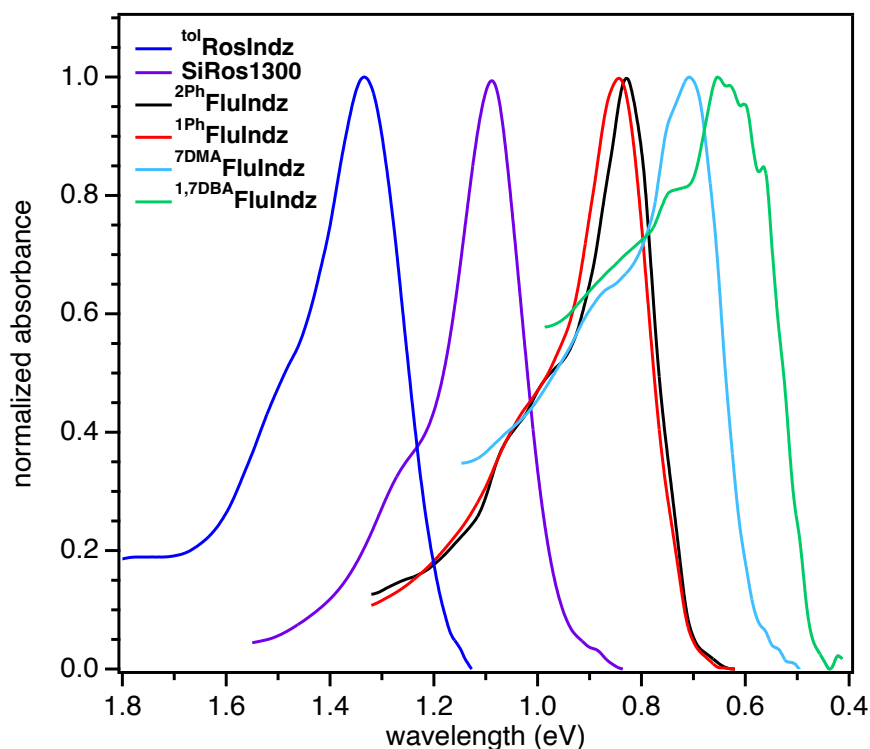

**Figure S6.** Normalized absorption spectrum of the lowest energy peak of <sup>tol</sup>RosIndz, SiRos1300, and all 4 FluIndz derivatives in DCM plotted in a linear energy scale (eV).

**Table S3.** Comparison of existing inorganic and organic SWIR/ESWIR materials. Note: none of the previous work cited in the category “organic small molecules” (the category that the FluIndz dyes fall under) have reported use in infrared photodetector devices.

| <i>material</i>                  | <i>intended application</i>                             | <i>comparison to FluIndz dyes</i>                                                                    | <i>references</i>          |
|----------------------------------|---------------------------------------------------------|------------------------------------------------------------------------------------------------------|----------------------------|
| NaErF <sub>4</sub> nanoparticles | biological imaging                                      | no SWIR/ESWIR absorption, rare and expensive Er                                                      | 4                          |
| InGaAs                           | SWIR camera                                             | expensive precious metal In, toxic As ions                                                           | 5, 6, 7, 8                 |
| HgCdTe                           | ESWIR photodetector                                     | costly and difficult manufacturing process, toxic Hg and Cd ions                                     | 6, 7, 8, 10, 11            |
| PbS colloidal quantum dots       | SWIR photodetector, biological imaging                  | toxic Pb ions                                                                                        | 9, 10, 11                  |
| organic polymers                 | SWIR photodetector, biological imaging                  | minimal absorption at wavelengths >1700 nm (ESWIR), generally not air-stable                         | 19, 20, 21, 22             |
| organic small molecules          | biological imaging, or none given / fundamental studies | minimal absorption at wavelengths >1400 nm, longer wavelength molecules are generally not air-stable | 12, 13, 14, 15, 16, 17, 18 |



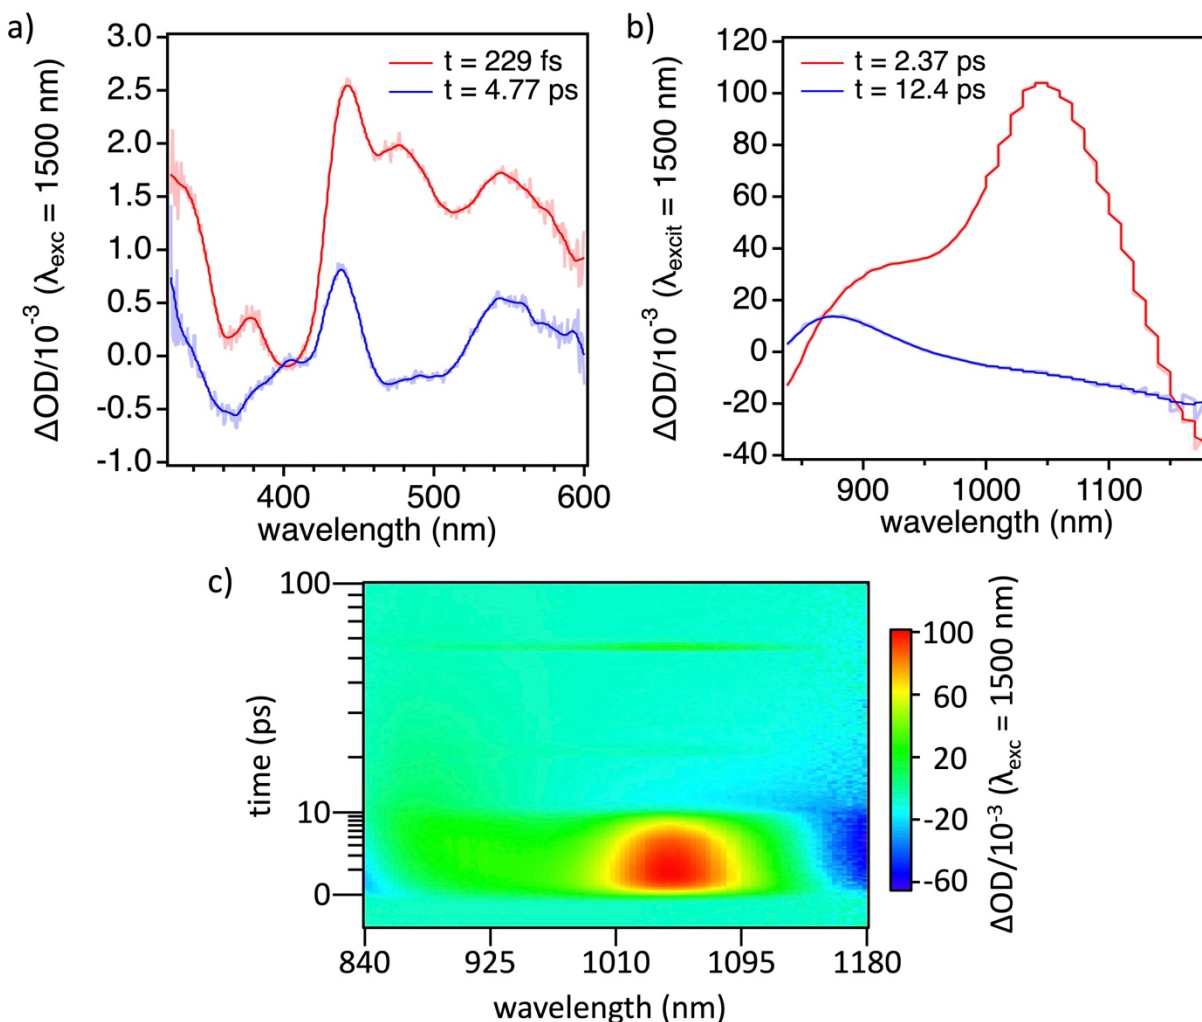

**Figure S7.** Excited state absorption spectra of  $^{1}\text{PhFluIndz}$  in the (a) UV-vis and (b) NIR and SWIR regions at the maximum signals in time and (c) three-dimensional differential absorption spectrum in the NIR region. UV-vis transient absorption spectra taken in DCM with 0.1 mM dye using a 2 mm path-length cuvette. NIR transient absorption spectra taken in DCM with 1 mM dye using a 1 mm path-length cuvette.

## ELECTROCHEMICAL MEASUREMENTS

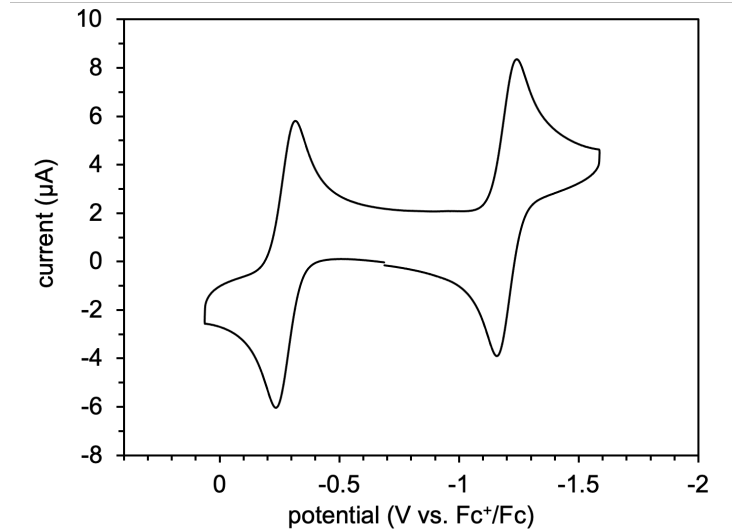

**Figure S8.** Cyclic voltammogram of <sup>2Ph</sup>FluIndz in DCM referenced to Fc<sup>+</sup>/Fc. Conditions were DCM with a 0.1 M NBu<sub>4</sub>PF<sub>6</sub> supporting electrolyte, glassy carbon working electrode, Pt counter electrode, and Ag pseudo reference electrode. Positive initial scan direction.

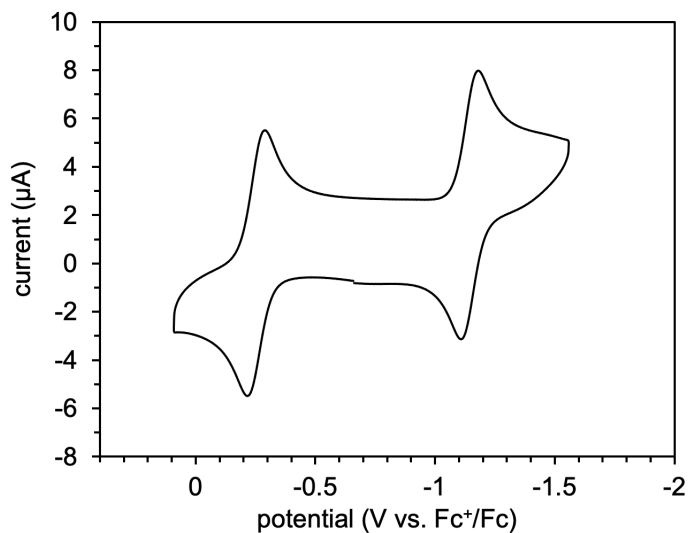

**Figure S9.** Cyclic voltammogram of <sup>1Ph</sup>FluIndz in DCM referenced to Fc<sup>+</sup>/Fc. Conditions were DCM with a 0.1 M NBu<sub>4</sub>PF<sub>6</sub> supporting electrolyte, glassy carbon working electrode, Pt counter electrode, and Ag pseudo reference electrode. Positive initial scan direction.

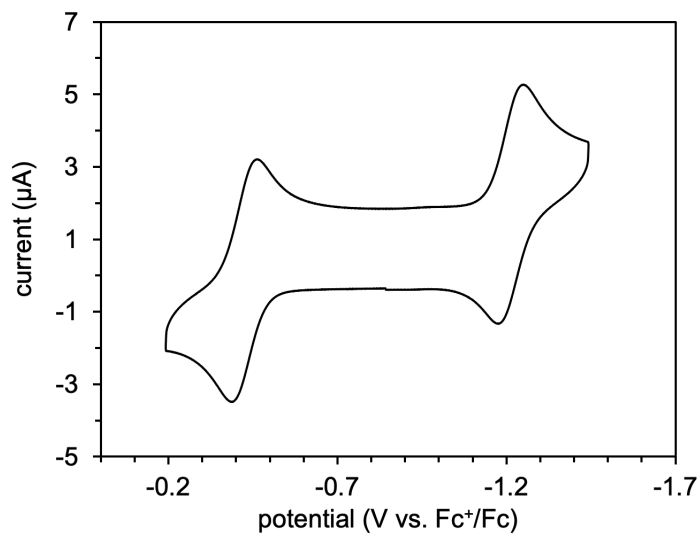

**Figure S10.** Cyclic voltammogram of <sup>7</sup>DMAFluIndz in DCM referenced to Fc<sup>+</sup>/Fc. Conditions were DCM with a 0.1 M NBu<sub>4</sub>PF<sub>6</sub> supporting electrolyte, glassy carbon working electrode, Pt counter electrode, and Ag pseudo reference electrode. Positive initial scan direction.

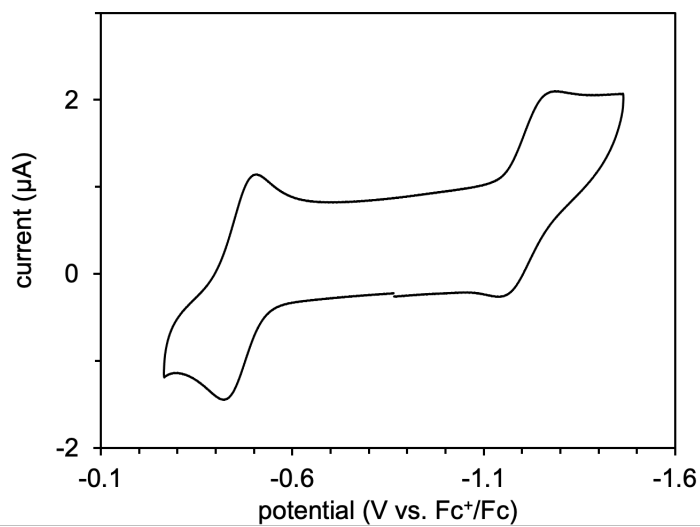

**Figure S11.** Cyclic voltammogram of <sup>1,7</sup>DBAFluIndz in DCM referenced to Fc<sup>+</sup>/Fc. Conditions were DCM with a 0.1 M NBu<sub>4</sub>PF<sub>6</sub> supporting electrolyte, glassy carbon working electrode, Pt counter electrode, and Ag pseudo reference electrode. Positive initial scan direction.

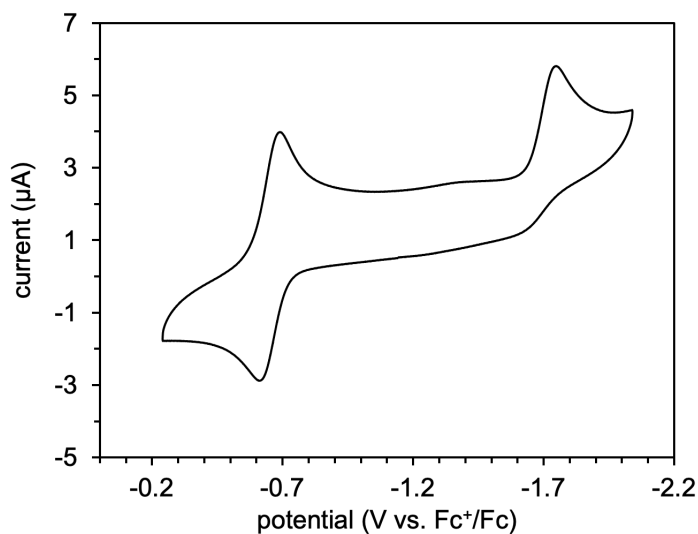

**Figure S12.** Cyclic voltammogram of **<sup>tol</sup>RosIndz** in DCM referenced to  $\text{Fc}^+/\text{Fc}$ . Conditions were DCM with a 0.1 M  $\text{NBu}_4\text{PF}_6$  supporting electrolyte, glassy carbon working electrode, Pt counter electrode, and Ag pseudo reference electrode. Positive initial scan direction.

**Table S4.** Electrochemical potentials referenced versus  $\text{Fc}^+/\text{Fc}$  at 0.00 V, versus the absolute potential of  $\text{Fc}^+/\text{Fc}$  at 4.8 V,<sup>3</sup> and versus the normal hydrogen electrode (NHE, where  $\text{Fc}^+/\text{Fc} = 0.7$  V vs. NHE).<sup>1,2</sup>

| Dye                             | Potential                   | V vs. $\text{Fc}^+/\text{Fc}$<br>(at 0.00 V) | V vs. $\text{Fc}^+/\text{Fc}$<br>(absolute) | V vs. NHE |
|---------------------------------|-----------------------------|----------------------------------------------|---------------------------------------------|-----------|
| <b><sup>tol</sup>RosIndz</b>    | $E_{\text{S}^+/\text{S}}$   | -0.65                                        | 4.15                                        | 0.05      |
|                                 | $E_{\text{S}/\text{S}^-}$   | -1.70                                        | 3.10                                        | -1.00     |
|                                 | $E_{\text{S}^+/\text{S}^*}$ | -1.84                                        | 2.96                                        | -1.14     |
| <b>SiRos1300</b>                | $E_{\text{S}^+/\text{S}}$   | -0.45                                        | 4.35                                        | 0.25      |
|                                 | $E_{\text{S}/\text{S}^-}$   | -1.68                                        | 3.12                                        | -0.98     |
|                                 | $E_{\text{S}^+/\text{S}^*}$ | -1.37                                        | 3.43                                        | -0.67     |
| <b><sup>2Ph</sup>FluIndz</b>    | $E_{\text{S}^+/\text{S}}$   | -0.28                                        | 4.52                                        | 0.42      |
|                                 | $E_{\text{S}/\text{S}^-}$   | -1.21                                        | 3.59                                        | -0.51     |
|                                 | $E_{\text{S}^+/\text{S}^*}$ | -1.01                                        | 3.79                                        | -0.31     |
| <b><sup>1Ph</sup>FluIndz</b>    | $E_{\text{S}^+/\text{S}}$   | -0.25                                        | 4.55                                        | 0.45      |
|                                 | $E_{\text{S}/\text{S}^-}$   | -1.15                                        | 3.65                                        | -0.45     |
|                                 | $E_{\text{S}^+/\text{S}^*}$ | -0.98                                        | 3.82                                        | -0.28     |
| <b><sup>7DMA</sup>FluIndz</b>   | $E_{\text{S}^+/\text{S}}$   | -0.43                                        | 4.37                                        | 0.27      |
|                                 | $E_{\text{S}/\text{S}^-}$   | -1.21                                        | 3.59                                        | -0.51     |
|                                 | $E_{\text{S}^+/\text{S}^*}$ | -1.03                                        | 3.77                                        | -0.33     |
| <b><sup>1,7DBA</sup>FluIndz</b> | $E_{\text{S}^+/\text{S}}$   | -0.47                                        | 4.33                                        | 0.23      |
|                                 | $E_{\text{S}/\text{S}^-}$   | -1.22                                        | 3.58                                        | -0.52     |
|                                 | $E_{\text{S}^+/\text{S}^*}$ | -0.95                                        | 3.85                                        | -0.25     |

COMPUTATIONAL DATA

**Table S5.** Density functional theory (DFT) and time-dependent DFT (TD-DFT) computational data computed at the B3LYP/6-311G(*d,p*) level of theory with dichloromethane implicit solvation. Significant vertical transitions reported with oscillator strength >0.2.

| Dye                             | HOMO (eV) | LUMO (eV) | $E_g^{H-L}$ (eV) | transit.                                       | orbitals                                                              | % Cont.              | Vert. Trans. (nm   eV)    | Osc. Str.      | Dipole (D) |
|---------------------------------|-----------|-----------|------------------|------------------------------------------------|-----------------------------------------------------------------------|----------------------|---------------------------|----------------|------------|
| <b><sup>tol</sup>RosIndz</b>    | -5.597    | -3.834    | 1.764            | $S_0 \rightarrow S_1$<br>$S_0 \rightarrow S_3$ | $H \rightarrow L$<br>$H^{-3} \rightarrow L$                           | 100<br>99.1          | 806   1.54<br>510   2.43  | 1.023<br>0.202 | 4.627      |
| <b>SiRos1300</b>                | -5.533    | -4.040    | 1.492            | $S_0 \rightarrow S_1$                          | $H \rightarrow L$                                                     | 99.1                 | 896   1.38                | 1.340          | 5.857      |
| <b><sup>2Ph</sup>FluIndz</b>    | -5.533    | -4.289    | 1.244            | $S_0 \rightarrow S_1$<br>$S_0 \rightarrow S_2$ | $H \rightarrow L$<br>$H^{-1} \rightarrow L$<br>$H^{-3} \rightarrow L$ | 96.5<br>94.7<br>4.4  | 1131   1.10<br>719   1.73 | 0.521<br>0.338 | 7.043      |
| <b><sup>1Ph</sup>FluIndz</b>    | -5.566    | -4.336    | 1.230            | $S_0 \rightarrow S_1$<br>$S_0 \rightarrow S_2$ | $H \rightarrow L$<br>$H^{-1} \rightarrow L$                           | 97.4<br>97.9         | 1151   1.08<br>744   1.67 | 0.631<br>0.362 | 4.471      |
| <b><sup>7DMA</sup>FluIndz</b>   | -5.069    | -4.071    | 0.999            | $S_0 \rightarrow S_1$<br>$S_0 \rightarrow S_2$ | $H \rightarrow L$<br>$H^{-1} \rightarrow L$                           | 98.8<br>98.4         | 1405   0.88<br>911   1.36 | 0.553<br>0.691 | 11.509     |
| <b><sup>1,7DBA</sup>FluIndz</b> | -4.929    | -4.067    | 0.862            | $S_0 \rightarrow S_1$<br>$S_0 \rightarrow S_4$ | $H \rightarrow L$<br>$H^{-3} \rightarrow L$<br>$H^{-1} \rightarrow L$ | 99.4<br>84.1<br>15.7 | 1635   0.76<br>918   1.35 | 0.681<br>0.532 | 13.287     |

**Table S6.** Singlet-triplet splitting energies ( $\Delta E_{ST}$ ) described as the adiabatic energy difference ( $\Delta E_{ST}^{ad}$ ) between the total energies of the optimized singlet ground state ( $S_0$ ) and first triplet state ( $T_1$ ) and as the vertical transition ( $\Delta E_{ST}^{vert}$ ) obtained via TD-DFT using the  $S_0$  optimized geometry with unrestricted formalism and triplet multiplicity. These data were computed at the B3LYP/6-311G(*d,p*) level of theory with dichloromethane implicit solvation. All transitions are given as absolute values resulting in positive values—in all cases, the singlet state is lower in energy than the triplet state. Minimal spin-contamination was observed with  $\langle S^2 \rangle$  values  $\leq 2.03$  before final annihilation.

| Dye                             | $\Delta E_{ST}^{ad}$ (eV   kcal/mol) | $\Delta E_{ST}^{vert}$ (eV   kcal/mol) |
|---------------------------------|--------------------------------------|----------------------------------------|
| <b><sup>tol</sup>RosIndz</b>    | 0.98   22.6                          | 1.05   24.3                            |
| <b>SiRos1300</b>                | 0.70   16.2                          | 0.75   17.2                            |
| <b><sup>2Ph</sup>FluIndz</b>    | 0.40   9.2                           | 0.44   10.1                            |
| <b><sup>1Ph</sup>FluIndz</b>    | 0.42   9.7                           | 0.46   10.6                            |
| <b><sup>7DMA</sup>FluIndz</b>   | 0.26   6.1                           | 0.31   7.2                             |
| <b><sup>1,7DBA</sup>FluIndz</b> | 0.16   3.6                           | 0.23   5.2                             |

*<sup>tot</sup>RosIndz (S<sub>0</sub>) Geometry and Frequency Data*

Total Energy: -2112.6946911 Hartrees

The optimized structure did not have any imaginary frequencies ( $n_i = 0$ ).

XYZ Coordinates (in Å):

|    | Atom | x         | y         | z         |
|----|------|-----------|-----------|-----------|
| 1  | C    | -1.212333 | 1.190942  | 0.035724  |
| 2  | C    | -1.181516 | -0.229687 | 0.094579  |
| 3  | O    | -0.008643 | -0.903729 | -0.028413 |
| 4  | C    | 1.165616  | -0.241928 | -0.196726 |
| 5  | C    | 1.200002  | 1.179285  | -0.228652 |
| 6  | C    | -0.004793 | 1.903997  | -0.115702 |
| 7  | C    | -2.495461 | 1.800439  | 0.141471  |
| 8  | C    | -3.628989 | 1.051519  | 0.291174  |
| 9  | C    | -3.581285 | -0.376654 | 0.365748  |
| 10 | C    | -2.321614 | -0.994453 | 0.255890  |
| 11 | C    | 2.303774  | -1.018389 | -0.309436 |
| 12 | C    | 3.564923  | -0.411672 | -0.456683 |
| 13 | C    | 3.615983  | 1.018200  | -0.476178 |
| 14 | C    | 2.484074  | 1.777774  | -0.376723 |
| 15 | C    | 4.784037  | -1.169662 | -0.574112 |
| 16 | C    | -4.801495 | -1.122606 | 0.536314  |
| 17 | C    | -0.003443 | 3.395873  | -0.168861 |
| 18 | C    | 0.175786  | 4.161382  | 1.000203  |
| 19 | C    | 0.166707  | 5.554764  | 0.878546  |
| 20 | C    | -0.011512 | 6.179077  | -0.353553 |
| 21 | C    | -0.188042 | 5.412415  | -1.501896 |
| 22 | C    | -0.184749 | 4.023630  | -1.406224 |
| 23 | C    | 0.368780  | 3.512861  | 2.350258  |
| 24 | N    | 4.882430  | -2.404493 | -1.225366 |
| 25 | C    | 6.201567  | -2.868111 | -1.119335 |
| 26 | C    | 6.944943  | -1.925626 | -0.384525 |
| 27 | C    | 6.075611  | -0.876114 | -0.061355 |
| 28 | C    | 3.966963  | -3.079104 | -2.000708 |
| 29 | C    | 4.308362  | -4.255636 | -2.600829 |
| 30 | C    | 5.614722  | -4.787047 | -2.452608 |
| 31 | C    | 6.549775  | -4.088076 | -1.730295 |
| 32 | C    | -6.094987 | -0.859030 | 0.011776  |
| 33 | C    | -6.965579 | -1.882462 | 0.406560  |
| 34 | C    | -6.221255 | -2.777500 | 1.197719  |
| 35 | N    | -4.900213 | -2.312482 | 1.266988  |
| 36 | C    | -6.570796 | -3.953568 | 1.888601  |
| 37 | C    | -5.634494 | -4.607736 | 2.650261  |
| 38 | C    | -4.325458 | -4.073166 | 2.756448  |
| 39 | C    | -3.982993 | -2.939414 | 2.079451  |
| 40 | C    | -6.454444 | 0.249104  | -0.904421 |

|    |   |           |           |           |
|----|---|-----------|-----------|-----------|
| 41 | C | 6.434075  | 0.287879  | 0.782976  |
| 42 | C | -5.820753 | 0.388129  | -2.147784 |
| 43 | C | -6.177887 | 1.416551  | -3.015676 |
| 44 | C | -7.174274 | 2.323760  | -2.656636 |
| 45 | C | -7.814791 | 2.192755  | -1.425693 |
| 46 | C | -7.460094 | 1.162122  | -0.557466 |
| 47 | C | 5.791431  | 0.511946  | 2.009268  |
| 48 | C | 6.147755  | 1.593395  | 2.810488  |
| 49 | C | 7.152243  | 2.469703  | 2.400730  |
| 50 | C | 7.801744  | 2.254343  | 1.186492  |
| 51 | C | 7.447904  | 1.170583  | 0.385176  |
| 52 | C | 8.384530  | -2.089157 | 0.000277  |
| 53 | C | -8.407098 | -2.067600 | 0.039215  |
| 54 | H | -2.560011 | 2.880135  | 0.114673  |
| 55 | H | -4.582795 | 1.548910  | 0.391600  |
| 56 | H | -2.212437 | -2.069406 | 0.235296  |
| 57 | H | 2.191961  | -2.089754 | -0.221548 |
| 58 | H | 4.570908  | 1.505546  | -0.610011 |
| 59 | H | 2.550302  | 2.856709  | -0.426338 |
| 60 | H | 0.301579  | 6.158072  | 1.769757  |
| 61 | H | -0.013108 | 7.261273  | -0.414279 |
| 62 | H | -0.328252 | 5.887322  | -2.465666 |
| 63 | H | -0.322085 | 3.418740  | -2.295310 |
| 64 | H | 1.268343  | 2.890786  | 2.373036  |
| 65 | H | -0.475717 | 2.868209  | 2.610561  |
| 66 | H | 0.465782  | 4.268669  | 3.130276  |
| 67 | H | 2.996722  | -2.625652 | -2.119304 |
| 68 | H | 3.565907  | -4.767007 | -3.198340 |
| 69 | H | 5.873468  | -5.725566 | -2.925790 |
| 70 | H | 7.566203  | -4.445734 | -1.628899 |
| 71 | H | -7.589071 | -4.312997 | 1.815927  |
| 72 | H | -5.894168 | -5.512282 | 3.185084  |
| 73 | H | -3.581396 | -4.547806 | 3.381627  |
| 74 | H | -3.010172 | -2.483661 | 2.163149  |
| 75 | H | -5.052769 | -0.319930 | -2.437336 |
| 76 | H | -5.681051 | 1.506530  | -3.975059 |
| 77 | H | -7.451285 | 3.124543  | -3.332631 |
| 78 | H | -8.590852 | 2.893321  | -1.139006 |
| 79 | H | -7.955730 | 1.070374  | 0.402305  |
| 80 | H | 5.017305  | -0.171569 | 2.338681  |
| 81 | H | 5.644222  | 1.748914  | 3.757916  |
| 82 | H | 7.428721  | 3.311774  | 3.024761  |
| 83 | H | 8.584274  | 2.930225  | 0.860781  |
| 84 | H | 7.950808  | 1.012772  | -0.562104 |
| 85 | H | 8.589586  | -3.106138 | 0.345734  |
| 86 | H | 8.654596  | -1.401671 | 0.802361  |

|    |   |           |           |           |
|----|---|-----------|-----------|-----------|
| 87 | H | 9.055077  | -1.891340 | -0.842936 |
| 88 | H | -8.686955 | -1.411618 | -0.785430 |
| 89 | H | -9.072028 | -1.842495 | 0.879986  |
| 90 | H | -8.609296 | -3.097728 | -0.267194 |



*<sup>tot</sup>RosIndz (T<sub>1</sub>) Geometry and Frequency Data*

Total Energy: -2112.6587071 Hartrees

The optimized structure did not have any imaginary frequencies ( $n_i = 0$ ).

XYZ Coordinates (in Å):

|    | Atom | x         | y         | z         |
|----|------|-----------|-----------|-----------|
| 1  | C    | -1.219222 | 1.242485  | 0.063101  |
| 2  | C    | -1.190992 | -0.175570 | 0.131908  |
| 3  | O    | -0.013527 | -0.868874 | 0.007881  |
| 4  | C    | 1.166366  | -0.197237 | -0.189866 |
| 5  | C    | 1.203359  | 1.220947  | -0.246685 |
| 6  | C    | -0.004603 | 1.965094  | -0.117856 |
| 7  | C    | -2.495932 | 1.848572  | 0.184580  |
| 8  | C    | -3.642135 | 1.100476  | 0.351076  |
| 9  | C    | -3.590801 | -0.310189 | 0.427757  |
| 10 | C    | -2.330782 | -0.933525 | 0.309692  |
| 11 | C    | 2.299893  | -0.975449 | -0.311762 |
| 12 | C    | 3.562006  | -0.373217 | -0.497740 |
| 13 | C    | 3.622190  | 1.038459  | -0.545175 |
| 14 | C    | 2.482064  | 1.805693  | -0.433608 |
| 15 | C    | 4.778554  | -1.157859 | -0.616719 |
| 16 | C    | -4.813192 | -1.075635 | 0.600167  |
| 17 | C    | -0.000410 | 3.455472  | -0.186143 |
| 18 | C    | 0.253762  | 4.236648  | 0.960430  |
| 19 | C    | 0.245734  | 5.629801  | 0.833013  |
| 20 | C    | -0.006011 | 6.248458  | -0.389530 |
| 21 | C    | -0.258380 | 5.473849  | -1.518386 |
| 22 | C    | -0.254968 | 4.085213  | -1.410819 |
| 23 | C    | 0.527133  | 3.596504  | 2.300769  |
| 24 | N    | 4.870371  | -2.326300 | -1.385611 |
| 25 | C    | 6.167595  | -2.840457 | -1.279658 |
| 26 | C    | 6.909054  | -1.981928 | -0.429848 |
| 27 | C    | 6.049278  | -0.944521 | -0.035991 |
| 28 | C    | 3.949929  | -2.897044 | -2.226386 |
| 29 | C    | 4.270727  | -4.033066 | -2.919949 |
| 30 | C    | 5.553607  | -4.608616 | -2.791029 |
| 31 | C    | 6.497166  | -4.003673 | -1.982517 |
| 32 | C    | -6.075532 | -0.910810 | -0.013730 |
| 33 | C    | -6.943892 | -1.907988 | 0.457980  |
| 34 | C    | -6.216783 | -2.689946 | 1.390061  |
| 35 | N    | -4.919308 | -2.171545 | 1.467549  |
| 36 | C    | -6.559880 | -3.784839 | 2.189599  |
| 37 | C    | -5.629497 | -4.317154 | 3.061941  |
| 38 | C    | -4.346551 | -3.735046 | 3.156970  |
| 39 | C    | -4.012656 | -2.666257 | 2.369142  |
| 40 | C    | -6.406484 | 0.094761  | -1.049844 |

|    |   |           |           |           |
|----|---|-----------|-----------|-----------|
| 41 | C | 6.394829  | 0.145560  | 0.905570  |
| 42 | C | -5.666568 | 0.173249  | -2.238437 |
| 43 | C | -5.995472 | 1.106199  | -3.217721 |
| 44 | C | -7.067835 | 1.977064  | -3.026197 |
| 45 | C | -7.811555 | 1.906925  | -1.849782 |
| 46 | C | -7.484996 | 0.971888  | -0.869651 |
| 47 | C | 5.670043  | 0.326038  | 2.092423  |
| 48 | C | 6.011739  | 1.338423  | 2.984549  |
| 49 | C | 7.081946  | 2.188249  | 2.705814  |
| 50 | C | 7.810619  | 2.017052  | 1.530377  |
| 51 | C | 7.471295  | 1.002398  | 0.637562  |
| 52 | C | 8.328187  | -2.213153 | -0.021942 |
| 53 | C | -8.357952 | -2.171838 | 0.052081  |
| 54 | H | -2.561778 | 2.928072  | 0.146467  |
| 55 | H | -4.595061 | 1.602958  | 0.449470  |
| 56 | H | -2.228325 | -2.010947 | 0.308356  |
| 57 | H | 2.191102  | -2.047758 | -0.213442 |
| 58 | H | 4.576775  | 1.523986  | -0.697695 |
| 59 | H | 2.553539  | 2.883831  | -0.497220 |
| 60 | H | 0.438582  | 6.238219  | 1.710488  |
| 61 | H | -0.005968 | 7.330524  | -0.457540 |
| 62 | H | -0.456280 | 5.943422  | -2.475105 |
| 63 | H | -0.449878 | 3.475000  | -2.286023 |
| 64 | H | 1.442553  | 2.997458  | 2.279223  |
| 65 | H | -0.285807 | 2.927939  | 2.598034  |
| 66 | H | 0.641538  | 4.355283  | 3.076374  |
| 67 | H | 2.995347  | -2.402821 | -2.312401 |
| 68 | H | 3.527642  | -4.471103 | -3.571896 |
| 69 | H | 5.800481  | -5.508764 | -3.338755 |
| 70 | H | 7.497753  | -4.405454 | -1.891528 |
| 71 | H | -7.560753 | -4.190427 | 2.121477  |
| 72 | H | -5.886888 | -5.164298 | 3.684271  |
| 73 | H | -3.614107 | -4.114450 | 3.856033  |
| 74 | H | -3.058115 | -2.167605 | 2.424334  |
| 75 | H | -4.837006 | -0.505726 | -2.397593 |
| 76 | H | -5.416062 | 1.150741  | -4.132883 |
| 77 | H | -7.322257 | 2.703840  | -3.789069 |
| 78 | H | -8.645539 | 2.581258  | -1.691942 |
| 79 | H | -8.060541 | 0.930353  | 0.048026  |
| 80 | H | 4.842394  | -0.336014 | 2.318830  |
| 81 | H | 5.444399  | 1.461286  | 3.900114  |
| 82 | H | 7.346464  | 2.976855  | 3.400829  |
| 83 | H | 8.642780  | 2.674286  | 1.305290  |
| 84 | H | 8.035186  | 0.881998  | -0.280452 |
| 85 | H | 8.505002  | -3.265437 | 0.215959  |
| 86 | H | 8.585116  | -1.617307 | 0.853888  |

|    |   |           |           |           |
|----|---|-----------|-----------|-----------|
| 87 | H | 9.024542  | -1.941266 | -0.823098 |
| 88 | H | -8.598862 | -1.660420 | -0.879911 |
| 89 | H | -9.065118 | -1.822991 | 0.812969  |
| 90 | H | -8.536042 | -3.241357 | -0.088059 |

**SiRos1300** ( $S_0$ ) Geometry and Frequency Data

Total Energy: -2446.1716099 Hartrees

The optimized structure did not have any imaginary frequencies ( $n_i = 0$ ).

XYZ Coordinates (in Å):

|    | Atom | x         | y         | z         |
|----|------|-----------|-----------|-----------|
| 1  | C    | -6.893250 | -2.352256 | 1.105760  |
| 2  | C    | -7.436651 | -3.463054 | 1.775927  |
| 3  | C    | -6.634564 | -4.245373 | 2.571397  |
| 4  | C    | -5.268775 | -3.904466 | 2.734068  |
| 5  | C    | -4.740450 | -2.830762 | 2.077449  |
| 6  | N    | -5.523370 | -2.085377 | 1.226960  |
| 7  | C    | -5.221738 | -0.923354 | 0.503618  |
| 8  | C    | -6.444736 | -0.471042 | -0.063806 |
| 9  | C    | -7.468612 | -1.355403 | 0.291696  |
| 10 | C    | -8.907015 | -1.326381 | -0.127414 |
| 11 | C    | -6.604431 | 0.679348  | -0.984541 |
| 12 | C    | -3.900546 | -0.372074 | 0.378059  |
| 13 | C    | -2.733764 | -1.178845 | 0.295494  |
| 14 | C    | -1.460406 | -0.659017 | 0.150523  |
| 15 | C    | -1.275818 | 0.764727  | 0.107299  |
| 16 | C    | -2.453300 | 1.569436  | 0.181337  |
| 17 | C    | -3.709153 | 1.029950  | 0.295516  |
| 18 | Si   | 0.000040  | -1.834763 | 0.000018  |
| 19 | C    | 1.460478  | -0.659009 | -0.150422 |
| 20 | C    | 1.275875  | 0.764715  | -0.107295 |
| 21 | C    | 0.000008  | 1.408476  | 0.000028  |
| 22 | C    | 2.733865  | -1.178828 | -0.295317 |
| 23 | C    | 3.900596  | -0.372035 | -0.378020 |
| 24 | C    | 3.709181  | 1.029976  | -0.295654 |
| 25 | C    | 2.453307  | 1.569451  | -0.181469 |
| 26 | C    | -0.147681 | -2.905890 | -1.541349 |
| 27 | C    | 0.147662  | -2.906099 | 1.541240  |
| 28 | C    | 5.221832  | -0.923310 | -0.503536 |
| 29 | C    | -0.000010 | 2.914449  | -0.000077 |
| 30 | N    | 5.523501  | -2.085223 | -1.226989 |
| 31 | C    | 6.893427  | -2.352013 | -1.105894 |
| 32 | C    | 7.468739  | -1.355211 | -0.291771 |
| 33 | C    | 6.444780  | -0.470969 | 0.063900  |
| 34 | C    | 4.740568  | -2.830620 | -2.077468 |
| 35 | C    | 5.268923  | -3.904227 | -2.734206 |
| 36 | C    | 6.634762  | -4.245046 | -2.571665 |
| 37 | C    | 7.436848  | -3.462733 | -1.776205 |
| 38 | C    | 6.604414  | 0.679308  | 0.984767  |
| 39 | C    | 8.907165  | -1.326031 | 0.127265  |
| 40 | C    | -5.918639 | 0.722551  | -2.206959 |

|    |   |           |           |           |
|----|---|-----------|-----------|-----------|
| 41 | C | -6.090841 | 1.793553  | -3.079623 |
| 42 | C | -6.950910 | 2.839573  | -2.746230 |
| 43 | C | -7.641751 | 2.805031  | -1.536334 |
| 44 | C | -7.472445 | 1.732002  | -0.663392 |
| 45 | C | 7.472773  | 1.731794  | 0.663985  |
| 46 | C | 7.642044  | 2.804719  | 1.537059  |
| 47 | C | 6.950822  | 2.839333  | 2.746736  |
| 48 | C | 6.090398  | 1.793489  | 3.079765  |
| 49 | C | 5.918230  | 0.722594  | 2.206966  |
| 50 | C | -0.094532 | 3.609769  | -1.222499 |
| 51 | C | -0.092717 | 5.007418  | -1.199872 |
| 52 | C | -0.000268 | 5.704503  | -0.000256 |
| 53 | C | 0.092332  | 5.007581  | 1.199476  |
| 54 | C | 0.094403  | 3.609968  | 1.222252  |
| 55 | C | 0.196427  | 2.879143  | 2.540937  |
| 56 | H | -8.492624 | -3.671287 | 1.662606  |
| 57 | H | -7.043792 | -5.101566 | 3.092048  |
| 58 | H | -4.627782 | -4.478339 | 3.389383  |
| 59 | H | -3.718686 | -2.513606 | 2.206812  |
| 60 | H | -9.054866 | -0.648189 | -0.968161 |
| 61 | H | -9.558625 | -0.990189 | 0.686353  |
| 62 | H | -9.252005 | -2.319000 | -0.429638 |
| 63 | H | -2.857404 | -2.255615 | 0.282971  |
| 64 | H | -2.357795 | 2.646113  | 0.163009  |
| 65 | H | -4.562859 | 1.689527  | 0.364931  |
| 66 | H | 2.857534  | -2.255593 | -0.282692 |
| 67 | H | 4.562873  | 1.689564  | -0.365187 |
| 68 | H | 2.357776  | 2.646127  | -0.163238 |
| 69 | H | -0.262027 | -2.294380 | -2.439562 |
| 70 | H | -1.011290 | -3.573251 | -1.468812 |
| 71 | H | 0.743939  | -3.528152 | -1.662140 |
| 72 | H | 0.261678  | -2.294726 | 2.439589  |
| 73 | H | 1.011407  | -3.573292 | 1.468798  |
| 74 | H | -0.743872 | -3.528545 | 1.661710  |
| 75 | H | 3.718768  | -2.513529 | -2.206721 |
| 76 | H | 4.627926  | -4.478104 | -3.389514 |
| 77 | H | 7.044011  | -5.101166 | -3.092419 |
| 78 | H | 8.492846  | -3.670901 | -1.662987 |
| 79 | H | 9.252810  | -2.318973 | 0.427642  |
| 80 | H | 9.054654  | -0.649277 | 0.969242  |
| 81 | H | 9.558514  | -0.987914 | -0.685917 |
| 82 | H | -5.255810 | -0.091811 | -2.476030 |
| 83 | H | -5.556638 | 1.809001  | -4.022902 |
| 84 | H | -7.083601 | 3.673546  | -3.425837 |
| 85 | H | -8.312853 | 3.613604  | -1.269702 |
| 86 | H | -8.005866 | 1.714524  | 0.280222  |

|     |   |           |           |           |
|-----|---|-----------|-----------|-----------|
| 87  | H | 8.006493  | 1.714274  | -0.279458 |
| 88  | H | 8.313419  | 3.613156  | 1.270701  |
| 89  | H | 7.083486  | 3.673224  | 3.426448  |
| 90  | H | 5.555891  | 1.808990  | 4.022872  |
| 91  | H | 5.255131  | -0.091635 | 2.475771  |
| 92  | C | -0.196825 | 2.878829  | -2.541092 |
| 93  | H | -0.164994 | 5.549326  | -2.136565 |
| 94  | H | -0.000341 | 6.788620  | -0.000272 |
| 95  | H | 0.164582  | 5.549734  | 2.136029  |
| 96  | H | 0.268839  | 3.587142  | 3.367475  |
| 97  | H | 1.077160  | 2.231412  | 2.575930  |
| 98  | H | -0.676540 | 2.244300  | 2.718455  |
| 99  | H | -0.265542 | 3.586810  | -3.367957 |
| 100 | H | -1.079780 | 2.234173  | -2.577245 |
| 101 | H | 0.674190  | 2.240924  | -2.717024 |

**SiRos1300** ( $T_1$ ) *Geometry and Frequency Data*

Total Energy: -2446.1457308 Hartrees

The optimized structure did not have any imaginary frequencies ( $n_i = 0$ ).

XYZ Coordinates (in Å):

|    | Atom | x         | y         | z         |
|----|------|-----------|-----------|-----------|
| 1  | C    | -6.914232 | -2.243036 | 1.258601  |
| 2  | C    | -7.464692 | -3.260836 | 2.044129  |
| 3  | C    | -6.672692 | -3.925422 | 2.960915  |
| 4  | C    | -5.319043 | -3.553815 | 3.115803  |
| 5  | C    | -4.782915 | -2.560051 | 2.341862  |
| 6  | N    | -5.555699 | -1.938381 | 1.395357  |
| 7  | C    | -5.234846 | -0.881463 | 0.531959  |
| 8  | C    | -6.427319 | -0.522913 | -0.140423 |
| 9  | C    | -7.463485 | -1.363599 | 0.291455  |
| 10 | C    | -8.882018 | -1.401730 | -0.178434 |
| 11 | C    | -6.543546 | 0.509568  | -1.196099 |
| 12 | C    | -3.901793 | -0.323221 | 0.416551  |
| 13 | C    | -2.742999 | -1.126485 | 0.358338  |
| 14 | C    | -1.461152 | -0.604475 | 0.222565  |
| 15 | C    | -1.278827 | 0.818165  | 0.157546  |
| 16 | C    | -2.459723 | 1.618337  | 0.213455  |
| 17 | C    | -3.718109 | 1.074411  | 0.323176  |
| 18 | Si   | -0.001974 | -1.778478 | 0.109268  |
| 19 | C    | 1.453126  | -0.614370 | -0.106137 |
| 20 | C    | 1.278034  | 0.810171  | -0.079714 |
| 21 | C    | 0.001779  | 1.471708  | 0.039071  |
| 22 | C    | 2.727329  | -1.146323 | -0.269884 |
| 23 | C    | 3.886602  | -0.350737 | -0.391331 |
| 24 | C    | 3.712473  | 1.049743  | -0.323275 |
| 25 | C    | 2.460677  | 1.602671  | -0.185847 |
| 26 | C    | -0.166378 | -2.937496 | -1.370278 |
| 27 | C    | 0.174183  | -2.798077 | 1.687880  |
| 28 | C    | 5.210827  | -0.919621 | -0.546240 |
| 29 | C    | 0.005714  | 2.976528  | 0.029854  |
| 30 | N    | 5.489283  | -2.003543 | -1.391365 |
| 31 | C    | 6.850448  | -2.313359 | -1.302189 |
| 32 | C    | 7.445047  | -1.409130 | -0.385695 |
| 33 | C    | 6.432816  | -0.549437 | 0.064407  |
| 34 | C    | 4.674625  | -2.647396 | -2.286724 |
| 35 | C    | 5.172816  | -3.667357 | -3.052055 |
| 36 | C    | 6.529201  | -4.044129 | -2.941447 |
| 37 | C    | 7.362174  | -3.358029 | -2.078183 |
| 38 | C    | 6.599467  | 0.513217  | 1.082896  |
| 39 | C    | 8.882258  | -1.443161 | 0.023605  |
| 40 | C    | -5.744672 | 0.453130  | -2.347279 |

|    |   |           |           |           |
|----|---|-----------|-----------|-----------|
| 41 | C | -5.872665 | 1.413555  | -3.346735 |
| 42 | C | -6.799521 | 2.447042  | -3.212877 |
| 43 | C | -7.600507 | 2.511869  | -2.074339 |
| 44 | C | -7.475330 | 1.549681  | -1.074270 |
| 45 | C | 7.527460  | 1.545603  | 0.888302  |
| 46 | C | 7.700330  | 2.536282  | 1.852823  |
| 47 | C | 6.951752  | 2.507933  | 3.027925  |
| 48 | C | 6.029066  | 1.482632  | 3.233903  |
| 49 | C | 5.853235  | 0.493832  | 2.270030  |
| 50 | C | -0.096801 | 3.673432  | -1.191829 |
| 51 | C | -0.091298 | 5.071604  | -1.178964 |
| 52 | C | 0.013412  | 5.775120  | 0.016327  |
| 53 | C | 0.114237  | 5.082658  | 1.218349  |
| 54 | C | 0.112037  | 3.684648  | 1.244673  |
| 55 | C | 0.224017  | 2.958250  | 2.565039  |
| 56 | H | -8.513403 | -3.501939 | 1.930495  |
| 57 | H | -7.090672 | -4.713899 | 3.573154  |
| 58 | H | -4.690595 | -4.036941 | 3.851113  |
| 59 | H | -3.765749 | -2.216637 | 2.442495  |
| 60 | H | -8.991807 | -0.884819 | -1.131928 |
| 61 | H | -9.554771 | -0.918143 | 0.538688  |
| 62 | H | -9.229453 | -2.430512 | -0.304186 |
| 63 | H | -2.865760 | -2.205025 | 0.370655  |
| 64 | H | -2.367685 | 2.694930  | 0.173268  |
| 65 | H | -4.577840 | 1.730600  | 0.368449  |
| 66 | H | 2.845614  | -2.225371 | -0.255392 |
| 67 | H | 4.572901  | 1.700422  | -0.412172 |
| 68 | H | 2.374707  | 2.680384  | -0.168427 |
| 69 | H | -0.287074 | -2.375736 | -2.300019 |
| 70 | H | -1.030882 | -3.598488 | -1.257229 |
| 71 | H | 0.721583  | -3.569840 | -1.467068 |
| 72 | H | 0.271191  | -2.153077 | 2.564928  |
| 73 | H | 1.057983  | -3.441529 | 1.640186  |
| 74 | H | -0.696995 | -3.444034 | 1.834273  |
| 75 | H | 3.656243  | -2.299979 | -2.356669 |
| 76 | H | 4.511724  | -4.167163 | -3.746490 |
| 77 | H | 6.916940  | -4.853537 | -3.546220 |
| 78 | H | 8.413122  | -3.603307 | -1.999726 |
| 79 | H | 9.224116  | -2.469520 | 0.181154  |
| 80 | H | 9.039151  | -0.885079 | 0.946725  |
| 81 | H | 9.527497  | -1.001185 | -0.743880 |
| 82 | H | -5.028141 | -0.351821 | -2.461717 |
| 83 | H | -5.250753 | 1.352575  | -4.232580 |
| 84 | H | -6.897316 | 3.195160  | -3.991116 |
| 85 | H | -8.322322 | 3.312747  | -1.961562 |
| 86 | H | -8.093387 | 1.612561  | -0.185904 |



|     |   |           |           |           |
|-----|---|-----------|-----------|-----------|
| 87  | H | 8.104815  | 1.579857  | -0.028548 |
| 88  | H | 8.418311  | 3.330684  | 1.683822  |
| 89  | H | 7.086773  | 3.278106  | 3.778609  |
| 90  | H | 5.447602  | 1.450310  | 4.148279  |
| 91  | H | 5.140036  | -0.304218 | 2.440234  |
| 92  | C | -0.213064 | 2.935087  | -2.505146 |
| 93  | H | -0.170301 | 5.609566  | -2.117802 |
| 94  | H | 0.016343  | 6.859504  | 0.011077  |
| 95  | H | 0.196110  | 5.629257  | 2.151947  |
| 96  | H | 0.298943  | 3.667536  | 3.390960  |
| 97  | H | 1.106506  | 2.312410  | 2.593974  |
| 98  | H | -0.645249 | 2.319396  | 2.746631  |
| 99  | H | -0.287186 | 3.636934  | -3.337469 |
| 100 | H | -1.097495 | 2.291649  | -2.526752 |
| 101 | H | 0.654091  | 2.292101  | -2.682213 |

***<sup>2Ph</sup>FluIndz** ( $S_0$ ) Geometry and Frequency Data*

Total Energy: -2076.7636455 Hartrees

The optimized structure did not have any imaginary frequencies ( $n_i = 0$ ).

XYZ Coordinates (in Å):

|    | Atom | x         | y         | z         |
|----|------|-----------|-----------|-----------|
| 1  | C    | 3.401329  | 1.110195  | 0.575959  |
| 2  | C    | 3.008936  | -0.253394 | 0.534379  |
| 3  | C    | 1.627250  | -0.559657 | 0.302287  |
| 4  | C    | 0.725193  | 0.455962  | 0.142596  |
| 5  | C    | 1.132253  | 1.826507  | 0.214806  |
| 6  | C    | 2.485977  | 2.135247  | 0.427845  |
| 7  | C    | 0.000028  | 2.662803  | -0.000070 |
| 8  | C    | -1.132212 | 1.826521  | -0.214923 |
| 9  | C    | -0.725174 | 0.455971  | -0.142693 |
| 10 | C    | -1.627247 | -0.559637 | -0.302358 |
| 11 | C    | -3.008932 | -0.253360 | -0.534461 |
| 12 | C    | -3.401305 | 1.110237  | -0.576022 |
| 13 | C    | -2.485935 | 2.135277  | -0.427939 |
| 14 | C    | 3.990260  | -1.292776 | 0.673410  |
| 15 | N    | 3.742212  | -2.524295 | 1.298110  |
| 16 | C    | 4.890359  | -3.319273 | 1.205946  |
| 17 | C    | 5.880698  | -2.588029 | 0.512883  |
| 18 | C    | 5.333195  | -1.340130 | 0.203931  |
| 19 | C    | 2.666987  | -2.935099 | 2.049333  |
| 20 | C    | 2.663187  | -4.175534 | 2.621135  |
| 21 | C    | 3.779145  | -5.034568 | 2.477319  |
| 22 | C    | 4.886953  | -4.597111 | 1.788567  |
| 23 | C    | 6.013611  | -0.292361 | -0.594182 |
| 24 | C    | 7.195496  | 0.299571  | -0.128581 |
| 25 | C    | 7.850863  | 1.268488  | -0.886254 |
| 26 | C    | 7.337669  | 1.656310  | -2.122457 |
| 27 | C    | 6.165802  | 1.068531  | -2.598302 |
| 28 | C    | 5.508774  | 0.102628  | -1.841161 |
| 29 | C    | -3.990300 | -1.292710 | -0.673440 |
| 30 | N    | -3.742407 | -2.524206 | -1.298263 |
| 31 | C    | -4.890567 | -3.319148 | -1.205927 |
| 32 | C    | -5.880777 | -2.587882 | -0.512704 |
| 33 | C    | -5.333191 | -1.340003 | -0.203829 |
| 34 | C    | -2.667348 | -2.935021 | -2.049721 |
| 35 | C    | -2.663694 | -4.175440 | -2.621559 |
| 36 | C    | -3.779643 | -5.034449 | -2.477545 |
| 37 | C    | -4.887309 | -4.596973 | -1.788578 |
| 38 | C    | -6.013464 | -0.292213 | 0.594378  |
| 39 | C    | -7.195382 | 0.299775  | 0.128932  |
| 40 | C    | -7.850610 | 1.268714  | 0.886697  |

|    |   |           |           |           |
|----|---|-----------|-----------|-----------|
| 41 | C | -7.337241 | 1.656503  | 2.122839  |
| 42 | C | -6.165339 | 1.068669  | 2.598528  |
| 43 | C | -5.508449 | 0.102745  | 1.841295  |
| 44 | C | 0.000039  | 4.144161  | -0.000077 |
| 45 | C | -0.006946 | 4.840040  | 1.227697  |
| 46 | C | -0.010723 | 6.237040  | 1.203931  |
| 47 | C | 0.000067  | 6.932952  | -0.000089 |
| 48 | C | 0.010844  | 6.237030  | -1.204103 |
| 49 | C | 0.007039  | 4.840030  | -1.227858 |
| 50 | C | 0.030111  | 4.107754  | -2.549693 |
| 51 | C | -0.030023 | 4.107775  | 2.549538  |
| 52 | C | 7.232222  | -3.123951 | 0.153213  |
| 53 | C | -7.232270 | -3.123758 | -0.152852 |
| 54 | H | 4.438818  | 1.349433  | 0.761153  |
| 55 | H | 1.315636  | -1.590048 | 0.189920  |
| 56 | H | 2.811830  | 3.167237  | 0.487159  |
| 57 | H | -1.315648 | -1.590024 | -0.189933 |
| 58 | H | -4.438795 | 1.349490  | -0.761190 |
| 59 | H | -2.811776 | 3.167271  | -0.487252 |
| 60 | H | 1.860479  | -2.231816 | 2.177789  |
| 61 | H | 1.800352  | -4.477836 | 3.198780  |
| 62 | H | 3.767610  | -6.016710 | 2.931975  |
| 63 | H | 5.772761  | -5.212159 | 1.698162  |
| 64 | H | 7.594610  | 0.007511  | 0.836137  |
| 65 | H | 8.761416  | 1.719982  | -0.509126 |
| 66 | H | 7.847874  | 2.409042  | -2.712374 |
| 67 | H | 5.764536  | 1.359617  | -3.562455 |
| 68 | H | 4.602544  | -0.355717 | -2.219979 |
| 69 | H | -1.860848 | -2.231760 | -2.178333 |
| 70 | H | -1.800982 | -4.477748 | -3.199386 |
| 71 | H | -3.768225 | -6.016578 | -2.932232 |
| 72 | H | -5.773125 | -5.211990 | -1.698035 |
| 73 | H | -7.594631 | 0.007742  | -0.835738 |
| 74 | H | -8.761191 | 1.720251  | 0.509689  |
| 75 | H | -7.847339 | 2.409252  | 2.712827  |
| 76 | H | -5.763936 | 1.359731  | 3.562632  |
| 77 | H | -4.602189 | -0.355641 | 2.219992  |
| 78 | H | -0.024433 | 6.779888  | 2.142721  |
| 79 | H | 0.000077  | 8.017100  | -0.000093 |
| 80 | H | 0.024563  | 6.779871  | -2.142897 |
| 81 | H | 0.143806  | 4.810938  | -3.375773 |
| 82 | H | -0.892765 | 3.544437  | -2.715177 |
| 83 | H | 0.856154  | 3.392807  | -2.598891 |
| 84 | H | 0.892870  | 3.544493  | 2.715047  |
| 85 | H | -0.856041 | 3.392798  | 2.598725  |
| 86 | H | -0.143761 | 4.810963  | 3.375610  |

|    |   |           |           |           |
|----|---|-----------|-----------|-----------|
| 87 | H | 7.875530  | -3.217455 | 1.034719  |
| 88 | H | 7.736281  | -2.467206 | -0.555593 |
| 89 | H | 7.157422  | -4.116694 | -0.299750 |
| 90 | H | -7.875703 | -3.217228 | -1.034271 |
| 91 | H | -7.736207 | -2.467002 | 0.556030  |
| 92 | H | -7.157444 | -4.116509 | 0.300088  |

***<sup>2Ph</sup>FluIndz (T<sub>1</sub>)** Geometry and Frequency Data*

Total Energy: -2076.7489911 Hartrees

The optimized structure did not have any imaginary frequencies ( $n_i = 0$ ).

XYZ Coordinates (in Å):

|    | Atom | x         | y         | z         |
|----|------|-----------|-----------|-----------|
| 1  | C    | 3.393946  | 1.109594  | 0.579519  |
| 2  | C    | 2.993055  | -0.256497 | 0.537150  |
| 3  | C    | 1.626958  | -0.559692 | 0.305432  |
| 4  | C    | 0.716335  | 0.462423  | 0.139817  |
| 5  | C    | 1.128374  | 1.837506  | 0.210640  |
| 6  | C    | 2.486653  | 2.138693  | 0.430926  |
| 7  | C    | -0.000026 | 2.685796  | 0.000021  |
| 8  | C    | -1.128402 | 1.837480  | -0.210626 |
| 9  | C    | -0.716335 | 0.462406  | -0.139775 |
| 10 | C    | -1.626936 | -0.559731 | -0.305382 |
| 11 | C    | -2.993033 | -0.256566 | -0.537138 |
| 12 | C    | -3.393953 | 1.109515  | -0.579528 |
| 13 | C    | -2.486684 | 2.138635  | -0.430933 |
| 14 | C    | 3.987403  | -1.292244 | 0.699421  |
| 15 | N    | 3.765058  | -2.473435 | 1.425234  |
| 16 | C    | 4.911864  | -3.270009 | 1.361717  |
| 17 | C    | 5.879169  | -2.585055 | 0.581090  |
| 18 | C    | 5.311424  | -1.367578 | 0.191760  |
| 19 | C    | 2.700276  | -2.831870 | 2.211552  |
| 20 | C    | 2.714980  | -4.027063 | 2.878425  |
| 21 | C    | 3.834155  | -4.882650 | 2.782987  |
| 22 | C    | 4.930638  | -4.493792 | 2.037816  |
| 23 | C    | 5.956546  | -0.368304 | -0.691559 |
| 24 | C    | 7.178756  | 0.214601  | -0.329471 |
| 25 | C    | 7.800151  | 1.138798  | -1.166951 |
| 26 | C    | 7.211819  | 1.490600  | -2.380267 |
| 27 | C    | 5.998302  | 0.912725  | -2.752457 |
| 28 | C    | 5.374709  | -0.008252 | -1.915562 |
| 29 | C    | -3.987358 | -1.292334 | -0.699406 |
| 30 | N    | -3.764973 | -2.473554 | -1.425160 |
| 31 | C    | -4.911767 | -3.270145 | -1.361640 |
| 32 | C    | -5.879124 | -2.585148 | -0.581114 |
| 33 | C    | -5.311395 | -1.367663 | -0.191788 |
| 34 | C    | -2.700153 | -2.832017 | -2.211415 |
| 35 | C    | -2.714811 | -4.027250 | -2.878219 |
| 36 | C    | -3.833977 | -4.882848 | -2.782777 |
| 37 | C    | -4.930497 | -4.493964 | -2.037672 |
| 38 | C    | -5.956561 | -0.368353 | 0.691457  |
| 39 | C    | -7.178770 | 0.214510  | 0.329300  |
| 40 | C    | -7.800209 | 1.138740  | 1.166710  |

|    |   |           |           |           |
|----|---|-----------|-----------|-----------|
| 41 | C | -7.211921 | 1.490621  | 2.380024  |
| 42 | C | -5.998402 | 0.912793  | 2.752282  |
| 43 | C | -5.374766 | -0.008219 | 1.915457  |
| 44 | C | -0.000046 | 4.169327  | 0.000025  |
| 45 | C | -0.001443 | 4.871466  | 1.224660  |
| 46 | C | -0.002199 | 6.269089  | 1.203727  |
| 47 | C | -0.000089 | 6.966039  | 0.000029  |
| 48 | C | 0.002042  | 6.269092  | -1.203670 |
| 49 | C | 0.001329  | 4.871469  | -1.224606 |
| 50 | C | 0.015591  | 4.139170  | -2.546619 |
| 51 | C | -0.015695 | 4.139165  | 2.546672  |
| 52 | C | 7.222046  | -3.138808 | 0.227021  |
| 53 | C | -7.222025 | -3.138881 | -0.227107 |
| 54 | H | 4.434301  | 1.341230  | 0.763827  |
| 55 | H | 1.310847  | -1.590842 | 0.202670  |
| 56 | H | 2.818469  | 3.168880  | 0.487571  |
| 57 | H | -1.310804 | -1.590873 | -0.202610 |
| 58 | H | -4.434313 | 1.341125  | -0.763844 |
| 59 | H | -2.818522 | 3.168815  | -0.487587 |
| 60 | H | 1.887014  | -2.127761 | 2.282520  |
| 61 | H | 1.861553  | -4.293534 | 3.486510  |
| 62 | H | 3.839361  | -5.827649 | 3.310463  |
| 63 | H | 5.816912  | -5.111696 | 1.978657  |
| 64 | H | 7.635989  | -0.047189 | 0.617944  |
| 65 | H | 8.742391  | 1.584537  | -0.869326 |
| 66 | H | 7.695512  | 2.208900  | -3.032144 |
| 67 | H | 5.537749  | 1.177202  | -3.697494 |
| 68 | H | 4.435278  | -0.458655 | -2.214169 |
| 69 | H | -1.886896 | -2.127903 | -2.282385 |
| 70 | H | -1.861354 | -4.293744 | -3.486251 |
| 71 | H | -3.839150 | -5.827875 | -3.310203 |
| 72 | H | -5.816767 | -5.111874 | -1.978520 |
| 73 | H | -7.635971 | -0.047345 | -0.618113 |
| 74 | H | -8.742450 | 1.584442  | 0.869032  |
| 75 | H | -7.695647 | 2.208948  | 3.031846  |
| 76 | H | -5.537882 | 1.177332  | 3.697318  |
| 77 | H | -4.435335 | -0.458586 | 2.214117  |
| 78 | H | -0.008097 | 6.812041  | 2.142880  |
| 79 | H | -0.000106 | 8.050433  | 0.000031  |
| 80 | H | 0.007922  | 6.812046  | -2.142822 |
| 81 | H | 0.119961  | 4.841344  | -3.375346 |
| 82 | H | -0.906439 | 3.571382  | -2.702921 |
| 83 | H | 0.842251  | 3.425302  | -2.599696 |
| 84 | H | 0.906330  | 3.571365  | 2.702961  |
| 85 | H | -0.842363 | 3.425305  | 2.599758  |
| 86 | H | -0.120048 | 4.841338  | 3.375401  |

|    |   |           |           |           |
|----|---|-----------|-----------|-----------|
| 87 | H | 7.908414  | -3.100221 | 1.080012  |
| 88 | H | 7.675219  | -2.574128 | -0.587487 |
| 89 | H | 7.148077  | -4.185264 | -0.081517 |
| 90 | H | -7.908349 | -3.100301 | -1.080134 |
| 91 | H | -7.675234 | -2.574184 | 0.587369  |
| 92 | H | -7.148080 | -4.185333 | 0.081449  |

*1<sup>Ph</sup>FluIndz (S<sub>0</sub>) Geometry and Frequency Data*

Total Energy: -1998.1162419 Hartrees

The optimized structure did not have any imaginary frequencies ( $n_i = 0$ ).

XYZ Coordinates (in Å):

|    | Atom | x         | y         | z         |
|----|------|-----------|-----------|-----------|
| 1  | C    | -5.113372 | -3.902034 | 1.087078  |
| 2  | C    | -4.027504 | -4.493123 | 1.691694  |
| 3  | C    | -2.878076 | -3.719966 | 1.976216  |
| 4  | C    | -2.821863 | -2.408069 | 1.601659  |
| 5  | N    | -3.873589 | -1.836444 | 0.927109  |
| 6  | C    | -5.066768 | -2.545671 | 0.727682  |
| 7  | C    | -4.040924 | -0.520555 | 0.464191  |
| 8  | C    | -5.368907 | -0.429717 | 0.010747  |
| 9  | C    | -6.012446 | -1.655144 | 0.146719  |
| 10 | C    | -3.028246 | 0.491614  | 0.393458  |
| 11 | C    | -1.638719 | 0.185713  | 0.222100  |
| 12 | C    | -0.731562 | 1.203375  | 0.107956  |
| 13 | C    | -1.140961 | 2.573476  | 0.161133  |
| 14 | C    | -2.504192 | 2.882339  | 0.303591  |
| 15 | C    | -3.422571 | 1.856628  | 0.412465  |
| 16 | C    | 0.731553  | 1.203370  | -0.107912 |
| 17 | C    | 1.140956  | 2.573466  | -0.161111 |
| 18 | C    | -0.000004 | 3.409978  | 0.000008  |
| 19 | C    | 1.638711  | 0.185704  | -0.222043 |
| 20 | C    | 3.028242  | 0.491613  | -0.393412 |
| 21 | C    | 3.422564  | 1.856617  | -0.412460 |
| 22 | C    | 2.504180  | 2.882329  | -0.303587 |
| 23 | C    | 4.040925  | -0.520573 | -0.464139 |
| 24 | N    | 3.873551  | -1.836494 | -0.926989 |
| 25 | C    | 5.066748  | -2.545711 | -0.727611 |
| 26 | C    | 6.012454  | -1.655160 | -0.146745 |
| 27 | C    | 5.368924  | -0.429726 | -0.010767 |
| 28 | C    | 2.821764  | -2.408162 | -1.601429 |
| 29 | C    | 2.877962  | -3.720075 | -1.975927 |
| 30 | C    | 4.027418  | -4.493204 | -1.691461 |
| 31 | C    | 5.113324  | -3.902090 | -1.086953 |
| 32 | C    | -7.389583 | -1.970858 | -0.264828 |
| 33 | C    | 7.389618  | -1.970857 | 0.264716  |
| 34 | C    | 0.000001  | 4.890658  | -0.000001 |
| 35 | C    | 0.083058  | 5.586666  | -1.225327 |
| 36 | C    | 0.076543  | 6.983557  | -1.201655 |
| 37 | C    | 0.000016  | 7.679431  | -0.000014 |
| 38 | C    | -0.076519 | 6.983568  | 1.201633  |
| 39 | C    | -0.083050 | 5.586677  | 1.225316  |
| 40 | C    | -0.152805 | 4.855801  | 2.546415  |



|    |   |            |           |           |
|----|---|------------|-----------|-----------|
| 41 | C | 0.152803   | 4.855775  | -2.546418 |
| 42 | C | -7.905993  | -1.440155 | -1.458735 |
| 43 | C | -9.213712  | -1.707015 | -1.851649 |
| 44 | C | -10.034073 | -2.513288 | -1.062993 |
| 45 | C | -9.536625  | -3.043701 | 0.126136  |
| 46 | C | -8.229787  | -2.773974 | 0.524013  |
| 47 | C | 8.229756   | -2.774022 | -0.524144 |
| 48 | C | 9.536623   | -3.043736 | -0.126353 |
| 49 | C | 10.034166  | -2.513258 | 1.062709  |
| 50 | C | 9.213871   | -1.706936 | 1.851383  |
| 51 | C | 7.906123   | -1.440091 | 1.458554  |
| 52 | H | -6.014729  | -4.463476 | 0.885040  |
| 53 | H | -4.059294  | -5.538457 | 1.970208  |
| 54 | H | -2.035056  | -4.147947 | 2.501041  |
| 55 | H | -1.985012  | -1.771134 | 1.835773  |
| 56 | H | -5.800704  | 0.459508  | -0.420975 |
| 57 | H | -1.316837  | -0.841349 | 0.117252  |
| 58 | H | -2.834207  | 3.914100  | 0.337923  |
| 59 | H | -4.468629  | 2.096506  | 0.549846  |
| 60 | H | 1.316840   | -0.841356 | -0.117198 |
| 61 | H | 4.468623   | 2.096488  | -0.549857 |
| 62 | H | 2.834190   | 3.914091  | -0.337941 |
| 63 | H | 5.800748   | 0.459517  | 0.420895  |
| 64 | H | 1.984894   | -1.771246 | -1.835492 |
| 65 | H | 2.034906   | -4.148092 | -2.500664 |
| 66 | H | 4.059192   | -5.538551 | -1.969927 |
| 67 | H | 6.014695   | -4.463524 | -0.884954 |
| 68 | H | 0.129960   | 7.526488  | -2.138927 |
| 69 | H | 0.000023   | 8.763554  | -0.000019 |
| 70 | H | -0.129930  | 7.526508  | 2.138900  |
| 71 | H | -0.097157  | 5.560289  | 3.377273  |
| 72 | H | 0.667690   | 4.140948  | 2.654532  |
| 73 | H | -1.084702  | 4.292545  | 2.648477  |
| 74 | H | -0.667699  | 4.140929  | -2.654525 |
| 75 | H | 1.084694   | 4.292510  | -2.648476 |
| 76 | H | 0.097159   | 5.560255  | -3.377284 |
| 77 | H | -7.269665  | -0.830017 | -2.089601 |
| 78 | H | -9.590366  | -1.291060 | -2.779230 |
| 79 | H | -11.051625 | -2.723728 | -1.371126 |
| 80 | H | -10.170180 | -3.660852 | 0.753038  |
| 81 | H | -7.872135  | -3.163116 | 1.469678  |
| 82 | H | 7.872029   | -3.163216 | -1.469759 |
| 83 | H | 10.170125  | -3.660927 | -0.753269 |
| 84 | H | 11.051741  | -2.723687 | 1.370774  |
| 85 | H | 9.590599   | -1.290931 | 2.778911  |
| 86 | H | 7.269848   | -0.829914 | 2.089435  |

*1<sup>Ph</sup>FluIndz (T<sub>1</sub>) Geometry and Frequency Data*

Total Energy: -1998.1008436 Hartrees

The optimized structure did not have any imaginary frequencies ( $n_i = 0$ ).

XYZ Coordinates (in Å):

|    | Atom | x         | y         | z         |
|----|------|-----------|-----------|-----------|
| 1  | C    | -5.141118 | -3.863864 | 1.239571  |
| 2  | C    | -4.066804 | -4.415770 | 1.910514  |
| 3  | C    | -2.924750 | -3.630009 | 2.170703  |
| 4  | C    | -2.858283 | -2.342513 | 1.712238  |
| 5  | N    | -3.897852 | -1.816763 | 0.989554  |
| 6  | C    | -5.084200 | -2.537489 | 0.800408  |
| 7  | C    | -4.043544 | -0.533003 | 0.432049  |
| 8  | C    | -5.349004 | -0.467164 | -0.071174 |
| 9  | C    | -6.009535 | -1.678526 | 0.130215  |
| 10 | C    | -3.017113 | 0.478439  | 0.361996  |
| 11 | C    | -1.640961 | 0.176810  | 0.205435  |
| 12 | C    | -0.723400 | 1.200927  | 0.097154  |
| 13 | C    | -1.138582 | 2.575465  | 0.143637  |
| 14 | C    | -2.508193 | 2.876062  | 0.279058  |
| 15 | C    | -3.419712 | 1.845798  | 0.378698  |
| 16 | C    | 0.723429  | 1.200929  | -0.097112 |
| 17 | C    | 1.138605  | 2.575469  | -0.143609 |
| 18 | C    | 0.000010  | 3.424256  | 0.000012  |
| 19 | C    | 1.640995  | 0.176816  | -0.205387 |
| 20 | C    | 3.017144  | 0.478451  | -0.361947 |
| 21 | C    | 3.419738  | 1.845811  | -0.378680 |
| 22 | C    | 2.508214  | 2.876072  | -0.279045 |
| 23 | C    | 4.043564  | -0.532998 | -0.432006 |
| 24 | N    | 3.897804  | -1.816782 | -0.989427 |
| 25 | C    | 5.084158  | -2.537516 | -0.800354 |
| 26 | C    | 6.009554  | -1.678543 | -0.130257 |
| 27 | C    | 5.349048  | -0.467169 | 0.071154  |
| 28 | C    | 2.858154  | -2.342547 | -1.711980 |
| 29 | C    | 2.924560  | -3.630061 | -2.170402 |
| 30 | C    | 4.066633  | -4.415824 | -1.910298 |
| 31 | C    | 5.141018  | -3.863909 | -1.239474 |
| 32 | C    | -7.373737 | -2.007763 | -0.295872 |
| 33 | C    | 7.373781  | -2.007784 | 0.295748  |
| 34 | C    | 0.000007  | 4.907466  | 0.000004  |
| 35 | C    | 0.089311  | 5.609510  | -1.221581 |
| 36 | C    | 0.086756  | 7.007083  | -1.200560 |
| 37 | C    | 0.000001  | 7.704004  | -0.000013 |
| 38 | C    | -0.086752 | 7.007097  | 1.200542  |
| 39 | C    | -0.089300 | 5.609525  | 1.221580  |
| 40 | C    | -0.171002 | 4.877887  | 2.541547  |

|    |   |            |           |           |
|----|---|------------|-----------|-----------|
| 41 | C | 0.171017   | 4.877856  | -2.541539 |
| 42 | C | -7.873458  | -1.492893 | -1.505632 |
| 43 | C | -9.170862  | -1.774452 | -1.917996 |
| 44 | C | -10.000193 | -2.575124 | -1.132245 |
| 45 | C | -9.521657  | -3.086515 | 0.073154  |
| 46 | C | -8.223705  | -2.806541 | 0.489436  |
| 47 | C | 8.223692   | -2.806586 | -0.489597 |
| 48 | C | 9.521668   | -3.086563 | -0.073392 |
| 49 | C | 10.000286  | -2.575149 | 1.131965  |
| 50 | C | 9.171013   | -1.774451 | 1.917751  |
| 51 | C | 7.873585   | -1.492890 | 1.505464  |
| 52 | H | -6.033521  | -4.442563 | 1.048777  |
| 53 | H | -4.107964  | -5.442016 | 2.251412  |
| 54 | H | -2.091987  | -4.025995 | 2.735178  |
| 55 | H | -2.021209  | -1.692495 | 1.907490  |
| 56 | H | -5.759992  | 0.396390  | -0.569437 |
| 57 | H | -1.314215  | -0.850461 | 0.108924  |
| 58 | H | -2.844513  | 3.905860  | 0.309954  |
| 59 | H | -4.469621  | 2.078265  | 0.505072  |
| 60 | H | 1.314255   | -0.850460 | -0.108888 |
| 61 | H | 4.469644   | 2.078281  | -0.505069 |
| 62 | H | 2.844529   | 3.905871  | -0.309958 |
| 63 | H | 5.760079   | 0.396393  | 0.569367  |
| 64 | H | 2.021065   | -1.692524 | -1.907162 |
| 65 | H | 2.091735   | -4.026060 | -2.734776 |
| 66 | H | 4.107746   | -5.442084 | -2.251158 |
| 67 | H | 6.033427   | -4.442615 | -1.048735 |
| 68 | H | 0.149834   | 7.550065  | -2.137552 |
| 69 | H | -0.000001  | 8.788378  | -0.000020 |
| 70 | H | -0.149831  | 7.550091  | 2.137527  |
| 71 | H | -0.129213  | 5.580843  | 3.375074  |
| 72 | H | 0.650865   | 4.165658  | 2.656024  |
| 73 | H | -1.100694  | 4.308238  | 2.630684  |
| 74 | H | -0.650848  | 4.165622  | -2.656007 |
| 75 | H | 1.100711   | 4.308210  | -2.630668 |
| 76 | H | 0.129225   | 5.580801  | -3.375075 |
| 77 | H | -7.230738  | -0.887387 | -2.134025 |
| 78 | H | -9.533659  | -1.373889 | -2.857580 |
| 79 | H | -11.010946 | -2.795388 | -1.455196 |
| 80 | H | -10.163729 | -3.696960 | 0.697634  |
| 81 | H | -7.883743  | -3.179110 | 1.447735  |
| 82 | H | 7.883667   | -3.179173 | -1.447866 |
| 83 | H | 10.163695  | -3.697027 | -0.697900 |
| 84 | H | 11.011058  | -2.795414 | 1.454856  |
| 85 | H | 9.533874   | -1.373870 | 2.857302  |
| 86 | H | 7.230911   | -0.887363 | 2.133884  |

*7DMAFluIndz (S<sub>0</sub>) Geometry and Frequency Data*

Total Energy: -2807.0022822 Hartrees

The optimized structure did not have any imaginary frequencies ( $n_i = 0$ ).

XYZ Coordinates (in Å):

|    | Atom | x         | y         | z         |
|----|------|-----------|-----------|-----------|
| 1  | C    | -1.117916 | 5.168801  | 1.283932  |
| 2  | C    | 0.119710  | 5.799001  | 1.144908  |
| 3  | C    | 0.872472  | 5.045053  | 0.211036  |
| 4  | N    | 0.097080  | 3.953458  | -0.188310 |
| 5  | C    | -1.141215 | 3.999863  | 0.467761  |
| 6  | C    | -2.161937 | 3.001844  | 0.326012  |
| 7  | C    | 2.147621  | 5.225111  | -0.329249 |
| 8  | C    | 2.653632  | 4.360002  | -1.296161 |
| 9  | C    | 1.785167  | 3.308961  | -1.731020 |
| 10 | C    | 0.544168  | 3.136329  | -1.198596 |
| 11 | C    | 3.991709  | 4.524398  | -1.873490 |
| 12 | C    | 0.631496  | 7.010214  | 1.861007  |
| 13 | C    | -2.179401 | 5.593286  | 2.227964  |
| 14 | C    | -1.833886 | 1.617184  | 0.156585  |
| 15 | C    | -2.833412 | 0.687017  | 0.057079  |
| 16 | C    | -4.213367 | 1.071844  | 0.104288  |
| 17 | C    | -4.543026 | 2.427515  | 0.280525  |
| 18 | C    | -3.535010 | 3.364397  | 0.396131  |
| 19 | C    | -2.805860 | -0.781859 | -0.079824 |
| 20 | C    | -4.170061 | -1.218579 | -0.127769 |
| 21 | C    | -5.027316 | -0.088882 | -0.012107 |
| 22 | C    | -1.772005 | -1.673934 | -0.177900 |
| 23 | C    | -2.047076 | -3.070040 | -0.344413 |
| 24 | C    | -3.405173 | -3.484481 | -0.415052 |
| 25 | C    | -4.448082 | -2.585939 | -0.302414 |
| 26 | C    | -0.987946 | -4.028223 | -0.481397 |
| 27 | C    | -6.509976 | -0.116135 | -0.012360 |
| 28 | N    | 0.245458  | -3.933194 | 0.179496  |
| 29 | C    | 1.065304  | -4.992935 | -0.218454 |
| 30 | C    | 0.343301  | -5.779668 | -1.149243 |
| 31 | C    | -0.916518 | -5.196140 | -1.295507 |
| 32 | C    | 0.653822  | -3.104615 | 1.196599  |
| 33 | C    | 1.894039  | -3.236258 | 1.742674  |
| 34 | C    | 2.805283  | -4.250613 | 1.310638  |
| 35 | C    | 2.340242  | -5.129539 | 0.335061  |
| 36 | C    | -1.956469 | -5.660660 | -2.244410 |
| 37 | C    | 0.902500  | -6.973524 | -1.859084 |
| 38 | C    | 4.145541  | -4.369814 | 1.894860  |
| 39 | C    | -7.202077 | -0.440525 | 1.173767  |
| 40 | C    | -8.599328 | -0.456334 | 1.152643  |

|    |   |           |           |           |
|----|---|-----------|-----------|-----------|
| 41 | C | -9.300899 | -0.165182 | -0.012385 |
| 42 | C | -8.609989 | 0.150231  | -1.177446 |
| 43 | C | -7.213030 | 0.183440  | -1.198541 |
| 44 | C | -2.567087 | 4.767495  | 3.292691  |
| 45 | C | -3.545896 | 5.181883  | 4.191643  |
| 46 | C | -4.154285 | 6.428035  | 4.042287  |
| 47 | C | -3.773850 | 7.259165  | 2.990448  |
| 48 | C | -2.792090 | 6.846271  | 2.091402  |
| 49 | C | 4.643478  | 5.772807  | -1.899503 |
| 50 | C | 5.905657  | 5.933803  | -2.438802 |
| 51 | C | 6.614419  | 4.835059  | -2.989721 |
| 52 | C | 5.962000  | 3.576378  | -2.964961 |
| 53 | C | 4.694459  | 3.438272  | -2.429134 |
| 54 | C | -2.375593 | -4.847585 | -3.307090 |
| 55 | C | -3.333504 | -5.299130 | -4.210621 |
| 56 | C | -3.889431 | -6.570347 | -4.068024 |
| 57 | C | -3.477395 | -7.388964 | -3.018278 |
| 58 | C | -2.516424 | -6.938828 | -2.114711 |
| 59 | C | 5.204803  | -4.980591 | 1.195798  |
| 60 | C | 6.471356  | -5.102485 | 1.735649  |
| 61 | C | 6.763916  | -4.619234 | 3.037071  |
| 62 | C | 5.700041  | -4.004168 | 3.744474  |
| 63 | C | 4.441923  | -3.884217 | 3.182797  |
| 64 | N | 7.866635  | 4.984062  | -3.521572 |
| 65 | C | 8.507766  | 6.292816  | -3.541853 |
| 66 | C | 8.556637  | 3.843388  | -4.110189 |
| 67 | N | 8.013495  | -4.739172 | 3.582410  |
| 68 | C | 9.087184  | -5.377304 | 2.831475  |
| 69 | C | 8.287887  | -4.219107 | 4.915840  |
| 70 | C | -6.463294 | -0.752359 | 2.454764  |
| 71 | C | -6.485792 | 0.521066  | -2.479612 |
| 72 | H | 2.733880  | 6.057411  | 0.036030  |
| 73 | H | 2.079908  | 2.651110  | -2.536306 |
| 74 | H | -0.140579 | 2.387914  | -1.563212 |
| 75 | H | -0.034691 | 7.292915  | 2.675971  |
| 76 | H | 0.715938  | 7.870354  | 1.187930  |
| 77 | H | 1.625023  | 6.831026  | 2.282507  |
| 78 | H | -0.798094 | 1.302979  | 0.172771  |
| 79 | H | -5.580471 | 2.740054  | 0.314765  |
| 80 | H | -3.793307 | 4.407753  | 0.509453  |
| 81 | H | -0.748852 | -1.321027 | -0.194973 |
| 82 | H | -3.623785 | -4.537135 | -0.526387 |
| 83 | H | -5.472940 | -2.937486 | -0.337245 |
| 84 | H | -0.051190 | -2.365741 | 1.540966  |
| 85 | H | 2.176576  | -2.534373 | 2.514248  |
| 86 | H | 2.939390  | -5.970636 | 0.013345  |

|     |   |            |           |           |
|-----|---|------------|-----------|-----------|
| 87  | H | 1.899372   | -6.765967 | -2.258724 |
| 88  | H | 0.261307   | -7.270985 | -2.688817 |
| 89  | H | 0.996057   | -7.834035 | -1.187591 |
| 90  | H | -9.137903  | -0.698234 | 2.062543  |
| 91  | H | -10.384992 | -0.184153 | -0.012372 |
| 92  | H | -9.156679  | 0.372865  | -2.087434 |
| 93  | H | -2.093688  | 3.800509  | 3.417987  |
| 94  | H | -3.831467  | 4.532588  | 5.011551  |
| 95  | H | -4.917262  | 6.749117  | 4.742116  |
| 96  | H | -4.241232  | 8.229531  | 2.867067  |
| 97  | H | -2.505867  | 7.493128  | 1.269811  |
| 98  | H | 4.139015   | 6.652546  | -1.517325 |
| 99  | H | 6.342934   | 6.922122  | -2.446144 |
| 100 | H | 6.454693   | 2.699786  | -3.361119 |
| 101 | H | 4.254315   | 2.448061  | -2.416536 |
| 102 | H | -1.942878  | -3.861084 | -3.427263 |
| 103 | H | -3.643800  | -4.659154 | -5.028864 |
| 104 | H | -4.636237  | -6.920395 | -4.771400 |
| 105 | H | -3.903960  | -8.378583 | -2.900023 |
| 106 | H | -2.205797  | -7.576336 | -1.294718 |
| 107 | H | 5.044655   | -5.344577 | 0.187505  |
| 108 | H | 7.245163   | -5.566306 | 1.140463  |
| 109 | H | 5.858097   | -3.625679 | 4.744382  |
| 110 | H | 3.662892   | -3.426849 | 3.781271  |
| 111 | H | 8.627171   | 6.698773  | -2.531521 |
| 112 | H | 7.937957   | 7.016326  | -4.136248 |
| 113 | H | 9.496544   | 6.196739  | -3.984409 |
| 114 | H | 8.723216   | 3.048396  | -3.374919 |
| 115 | H | 9.526608   | 4.167514  | -4.480058 |
| 116 | H | 7.996046   | 3.419711  | -4.951244 |
| 117 | H | 9.305669   | -4.841686 | 1.900620  |
| 118 | H | 8.843120   | -6.415271 | 2.579778  |
| 119 | H | 9.990046   | -5.381210 | 3.437746  |
| 120 | H | 8.118697   | -3.137833 | 4.972093  |
| 121 | H | 9.329167   | -4.410981 | 5.164037  |
| 122 | H | 7.663668   | -4.702750 | 5.675453  |
| 123 | H | -5.777487  | 0.054315  | 2.728654  |
| 124 | H | -5.865334  | -1.663657 | 2.363419  |
| 125 | H | -7.164558  | -0.893783 | 3.278399  |
| 126 | H | -7.191061  | 0.629446  | -3.304835 |
| 127 | H | -5.765982  | -0.256866 | -2.749168 |
| 128 | H | -5.927179  | 1.457333  | -2.391118 |

*7DMAFluIndz (T<sub>1</sub>) Geometry and Frequency Data*

Total Energy: -2806.992636 Hartrees

The optimized structure did not have any imaginary frequencies ( $n_i = 0$ ).

XYZ Coordinates (in Å):

|    | Atom | x         | y         | z         |
|----|------|-----------|-----------|-----------|
| 1  | C    | -1.089766 | 4.975705  | 1.752223  |
| 2  | C    | 0.098247  | 5.697711  | 1.584228  |
| 3  | C    | 0.793755  | 5.111972  | 0.495565  |
| 4  | N    | 0.030124  | 4.035632  | 0.030115  |
| 5  | C    | -1.133515 | 3.928838  | 0.793019  |
| 6  | C    | -2.137354 | 2.905619  | 0.580878  |
| 7  | C    | 1.998851  | 5.423584  | -0.128038 |
| 8  | C    | 2.452861  | 4.701958  | -1.235814 |
| 9  | C    | 1.598800  | 3.655182  | -1.711172 |
| 10 | C    | 0.423039  | 3.353213  | -1.096330 |
| 11 | C    | 3.720377  | 5.006784  | -1.896805 |
| 12 | C    | 0.611609  | 6.842848  | 2.398527  |
| 13 | C    | -2.088764 | 5.210967  | 2.820355  |
| 14 | C    | -1.782094 | 1.562372  | 0.301795  |
| 15 | C    | -2.767725 | 0.613057  | 0.119899  |
| 16 | C    | -4.157217 | 0.967629  | 0.199492  |
| 17 | C    | -4.508911 | 2.300224  | 0.488914  |
| 18 | C    | -3.515310 | 3.240683  | 0.680994  |
| 19 | C    | -2.709150 | -0.821843 | -0.144067 |
| 20 | C    | -4.065267 | -1.287157 | -0.230986 |
| 21 | C    | -4.958381 | -0.193903 | -0.018586 |
| 22 | C    | -1.649406 | -1.688960 | -0.319139 |
| 23 | C    | -1.893788 | -3.057148 | -0.596614 |
| 24 | C    | -3.239809 | -3.502089 | -0.703837 |
| 25 | C    | -4.306869 | -2.644152 | -0.520085 |
| 26 | C    | -0.809576 | -3.996521 | -0.799314 |
| 27 | C    | -6.440558 | -0.253341 | -0.024460 |
| 28 | N    | 0.356508  | -4.004089 | -0.032048 |
| 29 | C    | 1.208902  | -5.014135 | -0.492233 |
| 30 | C    | 0.564508  | -5.664520 | -1.575686 |
| 31 | C    | -0.676951 | -5.041489 | -1.752500 |
| 32 | C    | 0.684964  | -3.293896 | 1.097690  |
| 33 | C    | 1.874544  | -3.503943 | 1.724613  |
| 34 | C    | 2.815881  | -4.474388 | 1.253550  |
| 35 | C    | 2.430315  | -5.227534 | 0.140195  |
| 36 | C    | -1.648707 | -5.362588 | -2.823412 |
| 37 | C    | 1.172639  | -6.768924 | -2.380921 |
| 38 | C    | 4.099071  | -4.682349 | 1.922213  |
| 39 | C    | -7.129294 | -0.771518 | 1.094174  |
| 40 | C    | -8.526194 | -0.818810 | 1.069575  |

|    |   |           |           |           |
|----|---|-----------|-----------|-----------|
| 41 | C | -9.237785 | -0.366022 | -0.036398 |
| 42 | C | -8.555540 | 0.143041  | -1.136395 |
| 43 | C | -7.159213 | 0.208297  | -1.149095 |
| 44 | C | -2.413697 | 4.201013  | 3.737585  |
| 45 | C | -3.335832 | 4.434815  | 4.753702  |
| 46 | C | -3.950791 | 5.681121  | 4.871152  |
| 47 | C | -3.634567 | 6.693345  | 3.967068  |
| 48 | C | -2.709649 | 6.461074  | 2.950944  |
| 49 | C | 4.337343  | 6.270808  | -1.782343 |
| 50 | C | 5.532485  | 6.566103  | -2.405231 |
| 51 | C | 6.209493  | 5.597092  | -3.192679 |
| 52 | C | 5.595391  | 4.322484  | -3.308143 |
| 53 | C | 4.393775  | 4.050137  | -2.684795 |
| 54 | C | -2.048533 | -4.388190 | -3.749478 |
| 55 | C | -2.943887 | -4.702120 | -4.767976 |
| 56 | C | -3.456686 | -5.994381 | -4.879050 |
| 57 | C | -3.065424 | -6.971769 | -3.966036 |
| 58 | C | -2.167217 | -6.659144 | -2.947528 |
| 59 | C | 5.189839  | -5.289286 | 1.263656  |
| 60 | C | 6.405107  | -5.493015 | 1.884434  |
| 61 | C | 6.614724  | -5.103165 | 3.234012  |
| 62 | C | 5.520772  | -4.492823 | 3.901809  |
| 63 | C | 4.315351  | -4.290130 | 3.259803  |
| 64 | N | 7.393905  | 5.879505  | -3.810396 |
| 65 | C | 8.007363  | 7.195294  | -3.666745 |
| 66 | C | 8.053559  | 4.875666  | -4.638122 |
| 67 | N | 7.811986  | -5.304668 | 3.858564  |
| 68 | C | 8.912084  | -5.955485 | 3.155401  |
| 69 | C | 8.006487  | -4.874971 | 5.239030  |
| 70 | C | -6.384294 | -1.257330 | 2.316244  |
| 71 | C | -6.445260 | 0.752930  | -2.364852 |
| 72 | H | 2.579795  | 6.237850  | 0.282942  |
| 73 | H | 1.849819  | 3.104455  | -2.606211 |
| 74 | H | -0.253123 | 2.600009  | -1.468816 |
| 75 | H | 0.072540  | 6.924024  | 3.342550  |
| 76 | H | 0.497772  | 7.795932  | 1.870164  |
| 77 | H | 1.675054  | 6.722657  | 2.622886  |
| 78 | H | -0.738063 | 1.272422  | 0.281798  |
| 79 | H | -5.551231 | 2.590538  | 0.556598  |
| 80 | H | -3.788269 | 4.267100  | 0.887581  |
| 81 | H | -0.632114 | -1.315898 | -0.294624 |
| 82 | H | -3.428174 | -4.547488 | -0.909575 |
| 83 | H | -5.322003 | -3.017510 | -0.593495 |
| 84 | H | -0.041620 | -2.580387 | 1.452304  |
| 85 | H | 2.094754  | -2.895412 | 2.589655  |
| 86 | H | 3.054486  | -6.028068 | -0.232413 |



|     |   |            |           |           |
|-----|---|------------|-----------|-----------|
| 87  | H | 2.221691   | -6.560397 | -2.608345 |
| 88  | H | 0.641489   | -6.904720 | -3.323118 |
| 89  | H | 1.141596   | -7.723207 | -1.843389 |
| 90  | H | -9.057255  | -1.211132 | 1.930482  |
| 91  | H | -10.321363 | -0.409695 | -0.041030 |
| 92  | H | -9.109109  | 0.491720  | -2.001876 |
| 93  | H | -1.935107  | 3.232101  | 3.656513  |
| 94  | H | -3.572552  | 3.643749  | 5.456216  |
| 95  | H | -4.670054  | 5.861590  | 5.661783  |
| 96  | H | -4.109293  | 7.664508  | 4.049451  |
| 97  | H | -2.477083  | 7.249147  | 2.243791  |
| 98  | H | 3.853735   | 7.058691  | -1.217576 |
| 99  | H | 5.942242   | 7.559910  | -2.294614 |
| 100 | H | 6.069435   | 3.539752  | -3.882996 |
| 101 | H | 3.984857   | 3.052474  | -2.789282 |
| 102 | H | -1.649325  | -3.383561 | -3.673340 |
| 103 | H | -3.239405  | -3.937583 | -5.477547 |
| 104 | H | -4.155199  | -6.237117 | -5.671608 |
| 105 | H | -3.460689  | -7.978300 | -4.043316 |
| 106 | H | -1.876252  | -7.420982 | -2.233322 |
| 107 | H | 5.097196   | -5.582933 | 0.224909  |
| 108 | H | 7.205977   | -5.946921 | 1.318404  |
| 109 | H | 5.615336   | -4.186449 | 4.933815  |
| 110 | H | 3.510117   | -3.842823 | 3.829436  |
| 111 | H | 8.212044   | 7.429808  | -2.617109 |
| 112 | H | 7.370275   | 7.985738  | -4.078361 |
| 113 | H | 8.951759   | 7.206113  | -4.205340 |
| 114 | H | 8.330399   | 3.990692  | -4.055074 |
| 115 | H | 8.961599   | 5.303009  | -5.056403 |
| 116 | H | 7.414276   | 4.555446  | -5.467605 |
| 117 | H | 9.230251   | -5.377804 | 2.280741  |
| 118 | H | 8.636324   | -6.961361 | 2.822040  |
| 119 | H | 9.760684   | -6.043745 | 3.829347  |
| 120 | H | 7.851420   | -3.796615 | 5.349013  |
| 121 | H | 9.026000   | -5.102155 | 5.540780  |
| 122 | H | 7.325047   | -5.392464 | 5.922971  |
| 123 | H | -5.686965  | -0.500644 | 2.685954  |
| 124 | H | -5.795438  | -2.153653 | 2.100118  |
| 125 | H | -7.080600  | -1.500928 | 3.120517  |
| 126 | H | -7.151985  | 0.940810  | -3.174975 |
| 127 | H | -5.686586  | 0.054674  | -2.728701 |
| 128 | H | -5.931720  | 1.693203  | -2.143589 |

*1,7DBA FluIndz (S<sub>0</sub>) Geometry and Frequency Data*

Total Energy: -3458.5727606 Hartrees

The optimized structure did not have any imaginary frequencies ( $n_i = 0$ ).

XYZ Coordinates (in Å):

|    | Atom | x         | y         | z         |
|----|------|-----------|-----------|-----------|
| 1  | C    | -5.907135 | 0.084106  | -0.105716 |
| 2  | C    | -4.957087 | -0.621487 | -0.897239 |
| 3  | N    | -3.833863 | 0.194635  | -1.047829 |
| 4  | C    | -4.039745 | 1.403125  | -0.367291 |
| 5  | C    | -5.336680 | 1.329299  | 0.204348  |
| 6  | C    | -7.200787 | -0.462959 | 0.331855  |
| 7  | C    | -5.963266 | 2.374070  | 1.049932  |
| 8  | C    | -3.058791 | 2.453224  | -0.298860 |
| 9  | C    | -4.958527 | -1.896889 | -1.468345 |
| 10 | C    | -3.895566 | -2.346041 | -2.247816 |
| 11 | C    | -2.824405 | -1.422527 | -2.464298 |
| 12 | C    | -2.814825 | -0.191185 | -1.885325 |
| 13 | C    | -1.663954 | 2.157468  | -0.180838 |
| 14 | C    | -0.754837 | 3.178656  | -0.087849 |
| 15 | C    | -1.173741 | 4.549252  | -0.124170 |
| 16 | C    | -2.544484 | 4.846232  | -0.226076 |
| 17 | C    | -3.461517 | 3.815567  | -0.302685 |
| 18 | C    | 0.709514  | 3.185314  | 0.077304  |
| 19 | C    | 1.116151  | 4.559467  | 0.111925  |
| 20 | C    | -0.032699 | 5.391433  | -0.006691 |
| 21 | C    | 1.627903  | 2.172265  | 0.170793  |
| 22 | C    | 3.019770  | 2.480507  | 0.288464  |
| 23 | C    | 3.410234  | 3.846319  | 0.291663  |
| 24 | C    | 2.484084  | 4.868824  | 0.213712  |
| 25 | C    | -3.873398 | -3.684862 | -2.846373 |
| 26 | C    | 4.010344  | 1.439210  | 0.357403  |
| 27 | C    | -0.039451 | 6.873829  | -0.007804 |
| 28 | N    | 3.817317  | 0.229715  | 1.040658  |
| 29 | C    | 4.947910  | -0.576426 | 0.887532  |
| 30 | C    | 5.891641  | 0.139205  | 0.097558  |
| 31 | C    | 5.306892  | 1.377058  | -0.215865 |
| 32 | C    | 2.807225  | -0.162541 | 1.885652  |
| 33 | C    | 2.835376  | -1.387929 | 2.477299  |
| 34 | C    | 3.915113  | -2.300363 | 2.261936  |
| 35 | C    | 4.968202  | -1.845198 | 1.472051  |
| 36 | C    | 3.917869  | -3.636698 | 2.867974  |
| 37 | C    | 5.920451  | 2.425336  | -1.066576 |
| 38 | C    | 7.190598  | -0.394656 | -0.341354 |
| 39 | C    | -5.364440 | 2.787672  | 2.247768  |
| 40 | C    | -5.965490 | 3.760342  | 3.042883  |

|    |   |            |           |           |
|----|---|------------|-----------|-----------|
| 41 | C | -7.173793  | 4.336634  | 2.652967  |
| 42 | C | -7.779102  | 3.930763  | 1.464398  |
| 43 | C | -7.180496  | 2.955281  | 0.670539  |
| 44 | C | -7.622496  | -0.386532 | 1.669342  |
| 45 | C | -8.835631  | -0.908910 | 2.088478  |
| 46 | C | -9.719347  | -1.537075 | 1.177288  |
| 47 | C | -9.292672  | -1.621098 | -0.169487 |
| 48 | C | -8.072472  | -1.096134 | -0.569486 |
| 49 | C | -5.055198  | -4.407275 | -3.102574 |
| 50 | C | -5.039955  | -5.670542 | -3.662896 |
| 51 | C | -3.819134  | -6.308081 | -4.003703 |
| 52 | C | -2.627050  | -5.584999 | -3.746248 |
| 53 | C | -2.664409  | -4.318467 | -3.191943 |
| 54 | C | -0.154082  | 7.571097  | -1.229645 |
| 55 | C | -0.155495  | 8.968428  | -1.208540 |
| 56 | C | -0.052770  | 9.666437  | -0.010040 |
| 57 | C | 0.056692   | 8.971354  | 1.189570  |
| 58 | C | 0.068663   | 7.574115  | 1.212902  |
| 59 | C | 7.133582   | 3.019029  | -0.693399 |
| 60 | C | 7.720035   | 3.997832  | -1.492214 |
| 61 | C | 7.106561   | 4.394646  | -2.679666 |
| 62 | C | 5.902279   | 3.805943  | -3.063428 |
| 63 | C | 5.313362   | 2.829951  | -2.263324 |
| 64 | C | 7.607164   | -0.319389 | -1.680519 |
| 65 | C | 8.825116   | -0.829211 | -2.101334 |
| 66 | C | 9.719016   | -1.442880 | -1.190240 |
| 67 | C | 9.297641   | -1.525823 | 0.158229  |
| 68 | C | 8.072730   | -1.013238 | 0.560031  |
| 69 | C | 4.654420   | -4.699656 | 2.309840  |
| 70 | C | 4.667820   | -5.962548 | 2.871518  |
| 71 | C | 3.938637   | -6.247425 | 4.054543  |
| 72 | C | 3.195876   | -5.180178 | 4.619766  |
| 73 | C | 3.188478   | -3.925761 | 4.036995  |
| 74 | N | -10.938208 | -2.034582 | 1.580677  |
| 75 | C | -11.285047 | -2.054413 | 2.994633  |
| 76 | C | -11.751127 | -2.808471 | 0.653310  |
| 77 | N | -3.793861  | -7.560104 | -4.556208 |
| 78 | C | -5.035964  | -8.280321 | -4.806076 |
| 79 | C | -2.525984  | -8.175050 | -4.927798 |
| 80 | N | 3.950337   | -7.493413 | 4.621435  |
| 81 | C | 4.719211   | -8.571936 | 4.013734  |
| 82 | C | 3.177353   | -7.760724 | 5.827470  |
| 83 | N | 10.942381  | -1.928075 | -1.595294 |
| 84 | C | 11.285058  | -1.950028 | -3.010179 |
| 85 | C | 11.766395  | -2.689358 | -0.667256 |
| 86 | C | 0.176855   | 6.844053  | 2.531839  |

|     |   |            |           |           |
|-----|---|------------|-----------|-----------|
| 87  | C | -0.255137  | 6.838000  | -2.547478 |
| 88  | H | -5.810514  | -2.531407 | -1.270196 |
| 89  | H | -2.010508  | -1.669491 | -3.131043 |
| 90  | H | -2.038891  | 0.532044  | -2.077557 |
| 91  | H | -1.336776  | 1.128371  | -0.102278 |
| 92  | H | -2.882369  | 5.875883  | -0.255958 |
| 93  | H | -4.512262  | 4.048511  | -0.402776 |
| 94  | H | 1.309791   | 1.140245  | 0.092923  |
| 95  | H | 4.458867   | 4.088677  | 0.391737  |
| 96  | H | 2.812821   | 5.901462  | 0.242427  |
| 97  | H | 2.010285   | 0.542590  | 2.057029  |
| 98  | H | 1.998472   | -1.659066 | 3.104932  |
| 99  | H | 5.849446   | -2.451598 | 1.320375  |
| 100 | H | -4.427640  | 2.339627  | 2.558786  |
| 101 | H | -5.490761  | 4.066405  | 3.968343  |
| 102 | H | -7.640751  | 5.094703  | 3.271354  |
| 103 | H | -8.718726  | 4.373587  | 1.153850  |
| 104 | H | -7.654723  | 2.643063  | -0.252575 |
| 105 | H | -6.977319  | 0.078491  | 2.405145  |
| 106 | H | -9.095136  | -0.833040 | 3.135118  |
| 107 | H | -9.921340  | -2.089770 | -0.913532 |
| 108 | H | -7.804568  | -1.158901 | -1.618317 |
| 109 | H | -6.018419  | -3.959956 | -2.887013 |
| 110 | H | -5.982758  | -6.164442 | -3.850891 |
| 111 | H | -1.665102  | -6.022012 | -3.973711 |
| 112 | H | -1.720565  | -3.823651 | -2.995350 |
| 113 | H | -0.235580  | 9.510109  | -2.144853 |
| 114 | H | -0.057939  | 10.750697 | -0.010904 |
| 115 | H | 0.131666   | 9.515278  | 2.125006  |
| 116 | H | 7.614142   | 2.713875  | 0.228794  |
| 117 | H | 8.656594   | 4.450329  | -1.186394 |
| 118 | H | 7.564086   | 5.155305  | -3.301913 |
| 119 | H | 5.421262   | 4.104923  | -3.987957 |
| 120 | H | 4.379653   | 2.372278  | -2.569582 |
| 121 | H | 6.954240   | 0.134784  | -2.416296 |
| 122 | H | 9.080448   | -0.754790 | -3.149116 |
| 123 | H | 9.933991   | -1.983852 | 0.902369  |
| 124 | H | 7.809394   | -1.074824 | 1.610106  |
| 125 | H | 5.209693   | -4.546044 | 1.391825  |
| 126 | H | 5.239323   | -6.739590 | 2.383905  |
| 127 | H | 2.626898   | -5.332483 | 5.525991  |
| 128 | H | 2.621204   | -3.144227 | 4.528465  |
| 129 | H | -11.262376 | -1.047601 | 3.422165  |
| 130 | H | -10.610375 | -2.690388 | 3.583537  |
| 131 | H | -12.297517 | -2.437595 | 3.105611  |
| 132 | H | -12.003821 | -2.223983 | -0.236586 |

|     |   |            |           |           |
|-----|---|------------|-----------|-----------|
| 133 | H | -12.683133 | -3.083154 | 1.143227  |
| 134 | H | -11.250742 | -3.729539 | 0.325270  |
| 135 | H | -5.677275  | -7.750952 | -5.520211 |
| 136 | H | -5.605653  | -8.433187 | -3.883059 |
| 137 | H | -4.802151  | -9.257443 | -5.222412 |
| 138 | H | -1.987257  | -7.575519 | -5.670234 |
| 139 | H | -2.719525  | -9.153676 | -5.360863 |
| 140 | H | -1.872091  | -8.311975 | -4.059209 |
| 141 | H | 5.786681   | -8.330031 | 3.965356  |
| 142 | H | 4.372947   | -8.795693 | 2.998212  |
| 143 | H | 4.604837   | -9.471320 | 4.614427  |
| 144 | H | 3.497696   | -7.126961 | 6.661810  |
| 145 | H | 3.321972   | -8.798426 | 6.119078  |
| 146 | H | 2.105370   | -7.598604 | 5.667142  |
| 147 | H | 11.247884  | -0.945598 | -3.442240 |
| 148 | H | 10.616954  | -2.597452 | -3.594174 |
| 149 | H | 12.302149  | -2.320369 | -3.122621 |
| 150 | H | 12.015877  | -2.098366 | 0.219236  |
| 151 | H | 12.699584  | -2.956550 | -1.159062 |
| 152 | H | 11.276682  | -3.614087 | -0.333441 |
| 153 | H | 0.144292   | 7.548156  | 3.364588  |
| 154 | H | 1.111596   | 6.280946  | 2.605880  |
| 155 | H | -0.639030  | 6.127543  | 2.661531  |
| 156 | H | -1.185899  | 6.268386  | -2.622076 |
| 157 | H | 0.565826   | 6.126884  | -2.674639 |
| 158 | H | -0.226077  | 7.540880  | -3.381396 |

*1,7DBA FluIndz (T<sub>1</sub>) Geometry and Frequency Data*

Total Energy: -3458.5669722 Hartrees

The optimized structure did not have any imaginary frequencies ( $n_i = 0$ ).

XYZ Coordinates (in Å):

|    | Atom | x         | y         | z         |
|----|------|-----------|-----------|-----------|
| 1  | C    | -5.870527 | 0.081632  | 0.128667  |
| 2  | C    | -5.093127 | -0.488709 | -0.934057 |
| 3  | N    | -3.987471 | 0.337429  | -1.131104 |
| 4  | C    | -4.028152 | 1.404672  | -0.224252 |
| 5  | C    | -5.177985 | 1.253560  | 0.551619  |
| 6  | C    | -7.087408 | -0.489088 | 0.670644  |
| 7  | C    | -5.598068 | 2.196528  | 1.616371  |
| 8  | C    | -3.003773 | 2.452590  | -0.200590 |
| 9  | C    | -5.202937 | -1.655861 | -1.680674 |
| 10 | C    | -4.269633 | -1.979683 | -2.677036 |
| 11 | C    | -3.211411 | -1.044738 | -2.892231 |
| 12 | C    | -3.087542 | 0.076736  | -2.128893 |
| 13 | C    | -1.633170 | 2.123141  | -0.117015 |
| 14 | C    | -0.688246 | 3.133309  | -0.075759 |
| 15 | C    | -1.085845 | 4.506933  | -0.122163 |
| 16 | C    | -2.447538 | 4.830497  | -0.194521 |
| 17 | C    | -3.388858 | 3.809885  | -0.230513 |
| 18 | C    | 0.770339  | 3.111517  | 0.035233  |
| 19 | C    | 1.212879  | 4.477152  | 0.042405  |
| 20 | C    | 0.086498  | 5.341827  | -0.052371 |
| 21 | C    | 1.675949  | 2.072443  | 0.111623  |
| 22 | C    | 3.064579  | 2.345238  | 0.193780  |
| 23 | C    | 3.492067  | 3.699141  | 0.182692  |
| 24 | C    | 2.594102  | 4.747620  | 0.110787  |
| 25 | C    | -4.373815 | -3.207808 | -3.458003 |
| 26 | C    | 4.044499  | 1.271457  | 0.254279  |
| 27 | C    | 0.106482  | 6.824019  | -0.074114 |
| 28 | N    | 3.888033  | 0.138640  | 1.053010  |
| 29 | C    | 4.999888  | -0.702242 | 0.895866  |
| 30 | C    | 5.884920  | -0.082944 | -0.014709 |
| 31 | C    | 5.283533  | 1.136670  | -0.404765 |
| 32 | C    | 2.916482  | -0.169664 | 1.978134  |
| 33 | C    | 2.969481  | -1.336996 | 2.673466  |
| 34 | C    | 4.031870  | -2.279398 | 2.480171  |
| 35 | C    | 5.036315  | -1.919574 | 1.595117  |
| 36 | C    | 4.053187  | -3.560222 | 3.207249  |
| 37 | C    | 5.843172  | 2.103024  | -1.378942 |
| 38 | C    | 7.148585  | -0.671290 | -0.492544 |
| 39 | C    | -4.769896 | 2.449360  | 2.717709  |
| 40 | C    | -5.165536 | 3.340612  | 3.712570  |

|    |   |            |           |           |
|----|---|------------|-----------|-----------|
| 41 | C | -6.393161  | 3.994393  | 3.620275  |
| 42 | C | -7.223864  | 3.751228  | 2.526905  |
| 43 | C | -6.830846  | 2.858383  | 1.533386  |
| 44 | C | -7.383333  | -0.432469 | 2.052315  |
| 45 | C | -8.524472  | -0.996224 | 2.579781  |
| 46 | C | -9.476585  | -1.647432 | 1.748461  |
| 47 | C | -9.196119  | -1.686725 | 0.356028  |
| 48 | C | -8.039872  | -1.132781 | -0.152607 |
| 49 | C | -5.588591  | -3.917916 | -3.576920 |
| 50 | C | -5.693437  | -5.079198 | -4.312681 |
| 51 | C | -4.567779  | -5.626924 | -4.985212 |
| 52 | C | -3.342487  | -4.918056 | -4.867146 |
| 53 | C | -3.260956  | -3.751998 | -4.134752 |
| 54 | C | -0.074760  | 7.512319  | -1.293845 |
| 55 | C | -0.052056  | 8.909884  | -1.294174 |
| 56 | C | 0.142418   | 9.622332  | -0.115511 |
| 57 | C | 0.318827   | 8.940189  | 1.083658  |
| 58 | C | 0.305434   | 7.542970  | 1.124930  |
| 59 | C | 7.115471   | 2.657528  | -1.180140 |
| 60 | C | 7.648914   | 3.562398  | -2.094652 |
| 61 | C | 6.922404   | 3.926032  | -3.227921 |
| 62 | C | 5.658083   | 3.377655  | -3.439345 |
| 63 | C | 5.123296   | 2.475095  | -2.523134 |
| 64 | C | 7.461932   | -0.744072 | -1.858903 |
| 65 | C | 8.646766   | -1.303247 | -2.314469 |
| 66 | C | 9.599181   | -1.839663 | -1.415912 |
| 67 | C | 9.293795   | -1.750866 | -0.038167 |
| 68 | C | 8.102634   | -1.186854 | 0.399063  |
| 69 | C | 4.682292   | -4.700499 | 2.676383  |
| 70 | C | 4.716194   | -5.907890 | 3.353309  |
| 71 | C | 4.121299   | -6.049782 | 4.631260  |
| 72 | C | 3.475316   | -4.907411 | 5.162843  |
| 73 | C | 3.447496   | -3.709509 | 4.466997  |
| 74 | N | -10.609057 | -2.204192 | 2.263877  |
| 75 | C | -10.889609 | -2.124217 | 3.694665  |
| 76 | C | -11.569097 | -2.873443 | 1.391101  |
| 77 | N | -4.659754  | -6.777944 | -5.709967 |
| 78 | C | -5.927611  | -7.495082 | -5.802865 |
| 79 | C | -3.495956  | -7.300925 | -6.419024 |
| 80 | N | 4.171003   | -7.237793 | 5.321841  |
| 81 | C | 4.732354   | -8.425217 | 4.692916  |
| 82 | C | 3.430765   | -7.389778 | 6.566579  |
| 83 | N | 10.766287  | -2.429367 | -1.863741 |
| 84 | C | 11.142906  | -2.306638 | -3.264900 |
| 85 | C | 11.808196  | -2.778171 | -0.908466 |
| 86 | C | 0.486955   | 6.829907  | 2.445214  |

|     |   |            |           |           |
|-----|---|------------|-----------|-----------|
| 87  | C | -0.272265  | 6.764615  | -2.592410 |
| 88  | H | -6.014143  | -2.329663 | -1.451040 |
| 89  | H | -2.492952  | -1.193201 | -3.684895 |
| 90  | H | -2.302551  | 0.803049  | -2.273553 |
| 91  | H | -1.329406  | 1.084013  | -0.052149 |
| 92  | H | -2.768092  | 5.865735  | -0.223032 |
| 93  | H | -4.441243  | 4.055852  | -0.293891 |
| 94  | H | 1.331894   | 1.045724  | 0.064774  |
| 95  | H | 4.550954   | 3.910293  | 0.253681  |
| 96  | H | 2.952635   | 5.770913  | 0.117289  |
| 97  | H | 2.129426   | 0.554953  | 2.114438  |
| 98  | H | 2.166726   | -1.547102 | 3.366506  |
| 99  | H | 5.896519   | -2.557130 | 1.444507  |
| 100 | H | -3.815697  | 1.941416  | 2.796132  |
| 101 | H | -4.514267  | 3.523259  | 4.559771  |
| 102 | H | -6.699955  | 4.689192  | 4.393668  |
| 103 | H | -8.178175  | 4.259151  | 2.445597  |
| 104 | H | -7.479006  | 2.676140  | 0.683978  |
| 105 | H | -6.680851  | 0.038210  | 2.727202  |
| 106 | H | -8.681923  | -0.943065 | 3.647493  |
| 107 | H | -9.898975  | -2.139068 | -0.328866 |
| 108 | H | -7.893241  | -1.152486 | -1.225250 |
| 109 | H | -6.487108  | -3.535996 | -3.107812 |
| 110 | H | -6.656637  | -5.564145 | -4.380714 |
| 111 | H | -2.448794  | -5.292715 | -5.345130 |
| 112 | H | -2.294300  | -3.269244 | -4.061112 |
| 113 | H | -0.183794  | 9.440588  | -2.231206 |
| 114 | H | 0.156589   | 10.706571 | -0.131517 |
| 115 | H | 0.465240   | 9.494891  | 2.004487  |
| 116 | H | 7.684365   | 2.379919  | -0.300534 |
| 117 | H | 8.632562   | 3.984352  | -1.921059 |
| 118 | H | 7.338285   | 4.629515  | -3.940302 |
| 119 | H | 5.087378   | 3.650950  | -4.319937 |
| 120 | H | 4.142049   | 2.048596  | -2.696612 |
| 121 | H | 6.758201   | -0.357515 | -2.586913 |
| 122 | H | 8.828541   | -1.326185 | -3.379907 |
| 123 | H | 9.993717   | -2.113422 | 0.701601  |
| 124 | H | 7.925120   | -1.121325 | 1.466995  |
| 125 | H | 5.132957   | -4.654553 | 1.691352  |
| 126 | H | 5.198311   | -6.751546 | 2.879757  |
| 127 | H | 2.997757   | -4.952277 | 6.131552  |
| 128 | H | 2.960456   | -2.861887 | 4.935352  |
| 129 | H | -10.969642 | -1.085144 | 4.029597  |
| 130 | H | -10.110371 | -2.618843 | 4.283297  |
| 131 | H | -11.834899 | -2.620840 | 3.897906  |
| 132 | H | -11.994558 | -2.181867 | 0.656370  |



|     |   |            |           |           |
|-----|---|------------|-----------|-----------|
| 133 | H | -12.381380 | -3.268598 | 1.995664  |
| 134 | H | -11.105902 | -3.707283 | 0.854516  |
| 135 | H | -6.698262  | -6.890960 | -6.293735 |
| 136 | H | -6.295027  | -7.786860 | -4.813933 |
| 137 | H | -5.780594  | -8.398987 | -6.388711 |
| 138 | H | -3.113701  | -6.579687 | -7.148606 |
| 139 | H | -3.783191  | -8.202960 | -6.953515 |
| 140 | H | -2.685403  | -7.556913 | -5.728612 |
| 141 | H | 5.769971   | -8.259553 | 4.387765  |
| 142 | H | 4.162412   | -8.739086 | 3.808310  |
| 143 | H | 4.724742   | -9.243204 | 5.410427  |
| 144 | H | 3.748474   | -6.652517 | 7.310118  |
| 145 | H | 3.626458   | -8.378426 | 6.976686  |
| 146 | H | 2.347082   | -7.285062 | 6.423673  |
| 147 | H | 11.312324  | -1.263938 | -3.568764 |
| 148 | H | 10.374557  | -2.729677 | -3.917805 |
| 149 | H | 12.061371  | -2.865880 | -3.434483 |
| 150 | H | 12.216465  | -1.901001 | -0.386567 |
| 151 | H | 12.622464  | -3.270905 | -1.436964 |
| 152 | H | 11.433608  | -3.476878 | -0.155372 |
| 153 | H | 0.492240   | 7.543482  | 3.270925  |
| 154 | H | 1.428500   | 6.273923  | 2.476915  |
| 155 | H | -0.314653  | 6.107944  | 2.623380  |
| 156 | H | -1.217073  | 6.213227  | -2.600821 |
| 157 | H | 0.524087   | 6.033593  | -2.757081 |
| 158 | H | -0.280519  | 7.455028  | -3.437551 |

*Nucleus-independent chemical shift (NICS) calculations for (anti-)aromaticity*

In the NICS analysis reported here, the ZZ component of the magnetic shielding tensor has been determined at a series of points on a line that runs through the geometric center of each ring and is perpendicular to a mean ring plane taken to be the average of the 5 or 6 planes defined by the bond angles in each ring. The most relevant data for this analysis are typically reported at 1 Ångstrom (Å) above or below the ring, denoted here as NICS<sub>ZZ</sub>(+1) or NICS<sub>ZZ</sub>(-1). Negative NICS<sub>ZZ</sub> values signify aromatic character for the ring, whereas positive values are indicative of an antiaromatic ring. These sign conventions are consistent with those used for reporting NMR chemical shifts.

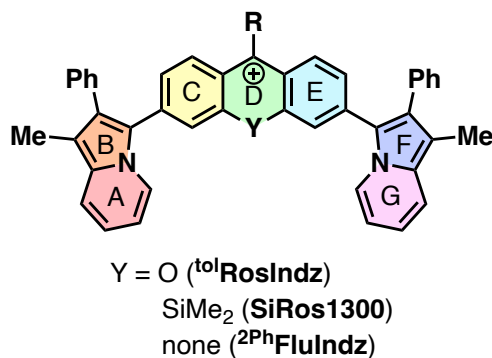

**Figure S13.** Generic indolizine-xanthenone structure with ring naming/color system used for NICS analysis.

**Table S7.** NICS<sub>ZZ</sub> (in ppm) at  $\pm 1$  Å from the center of each ring of <sup>10</sup>**RosIndz** for both the singlet ground (S<sub>0</sub>) and first triplet (T<sub>1</sub>) states. Values are rounded to the first decimal place. Note that the values are not symmetric above and below many of the rings because the two faces of these rings are not symmetry equivalent. For this reason, an average is given, which is the value reported in Figure 4.

| State                     | Ring | NICS <sub>ZZ</sub> (+1) | NICS <sub>ZZ</sub> (-1) | NICS <sub>ZZ</sub> (avg) |
|---------------------------|------|-------------------------|-------------------------|--------------------------|
| Singlet (S <sub>0</sub> ) | A    | -13.5                   | -8.2                    | -10.9                    |
|                           | B    | -15.0                   | -17.7                   | -16.4                    |
|                           | C    | -16.2                   | -15.9                   | -16.1                    |
|                           | D    | -4.6                    | -4.9                    | -4.8                     |
|                           | E    | -15.7                   | -16.4                   | -16.0                    |
|                           | F    | -18.8                   | -16.2                   | -16.2                    |
|                           | G    | -9.0                    | -14.2                   | -11.6                    |
| Triplet (T <sub>1</sub> ) | A    | -9.5                    | -5.2                    | -7.3                     |
|                           | B    | -6.6                    | -9.2                    | -7.9                     |
|                           | C    | -11.9                   | -12.1                   | -12.0                    |
|                           | D    | +11.1                   | +10.8                   | +11.0                    |
|                           | E    | -11.8                   | -11.9                   | -11.8                    |
|                           | F    | -10.1                   | -7.5                    | -8.8                     |
|                           | G    | -6.0                    | -10.4                   | -8.2                     |

**Table S8.** NICS<sub>ZZ</sub> (in ppm) at  $\pm 1$  Å from the center of each ring of **SiRos1300** for both the singlet ground ( $S_0$ ) and first triplet ( $T_1$ ) states. Values are rounded to the first decimal place. Note that the values are not symmetric above and below many of the rings because the two faces of these rings are not symmetry equivalent. For this reason, an average is given, which is the value reported in Figure 4.

| State             | Ring | NICS <sub>ZZ</sub> (+1) | NICS <sub>ZZ</sub> (-1) | NICS <sub>ZZ</sub> (avg) |
|-------------------|------|-------------------------|-------------------------|--------------------------|
| Singlet ( $S_0$ ) | A    | -13.0                   | -7.8                    | -10.4                    |
|                   | B    | -13.8                   | -16.4                   | -15.1                    |
|                   | C    | -12.4                   | -12.5                   | -12.4                    |
|                   | D    | +9.1                    | +9.0                    | +9.1                     |
|                   | E    | -12.5                   | -12.4                   | -12.4                    |
|                   | F    | -16.4                   | -13.8                   | -15.1                    |
|                   | G    | -7.8                    | -13.0                   | -10.4                    |
| Triplet ( $T_1$ ) | A    | -9.1                    | -4.7                    | -6.9                     |
|                   | B    | -6.2                    | -8.7                    | -7.5                     |
|                   | C    | -14.8                   | -14.8                   | -14.8                    |
|                   | D    | +7.5                    | +7.4                    | +7.5                     |
|                   | E    | -14.5                   | -14.6                   | -14.6                    |
|                   | F    | -9.1                    | -6.5                    | -7.8                     |
|                   | G    | -5.1                    | -9.6                    | -7.3                     |

**Table S9.** NICS<sub>ZZ</sub> (in ppm) at  $\pm 1$  Å from the center of each ring of <sup>2</sup>PhFluIndz for both the singlet ground (S<sub>0</sub>) and first triplet (T<sub>1</sub>) states. Values are rounded to the first decimal place. Note that the values are not symmetric above and below many of the rings because the two faces of these rings are not symmetry equivalent. For this reason, an average is given, which is the value reported in Figure 4.

| State                     | Ring | NICS <sub>ZZ</sub> (+1) | NICS <sub>ZZ</sub> (-1) | NICS <sub>ZZ</sub> (avg) |
|---------------------------|------|-------------------------|-------------------------|--------------------------|
| Singlet (S <sub>0</sub> ) | A    | -9.5                    | -14.6                   | -12.0                    |
|                           | B    | -17.1                   | -14.7                   | -15.9                    |
|                           | C    | -0.1                    | +0.3                    | +0.1                     |
|                           | D    | +25.6                   | +25.6                   | +25.6                    |
|                           | E    | +0.3                    | -0.1                    | +0.1                     |
|                           | F    | -14.7                   | -17.1                   | -15.9                    |
|                           | G    | -14.6                   | -9.5                    | -12.0                    |
| Triplet (T <sub>1</sub> ) | A    | -6.8                    | -11.3                   | -9.1                     |
|                           | B    | -10.7                   | -8.1                    | -9.4                     |
|                           | C    | -11.6                   | -11.7                   | -11.6                    |
|                           | D    | -0.5                    | -0.5                    | -0.5                     |
|                           | E    | -11.7                   | -11.6                   | -11.6                    |
|                           | F    | -8.1                    | -10.7                   | -9.4                     |
|                           | G    | -11.3                   | -6.8                    | -9.0                     |

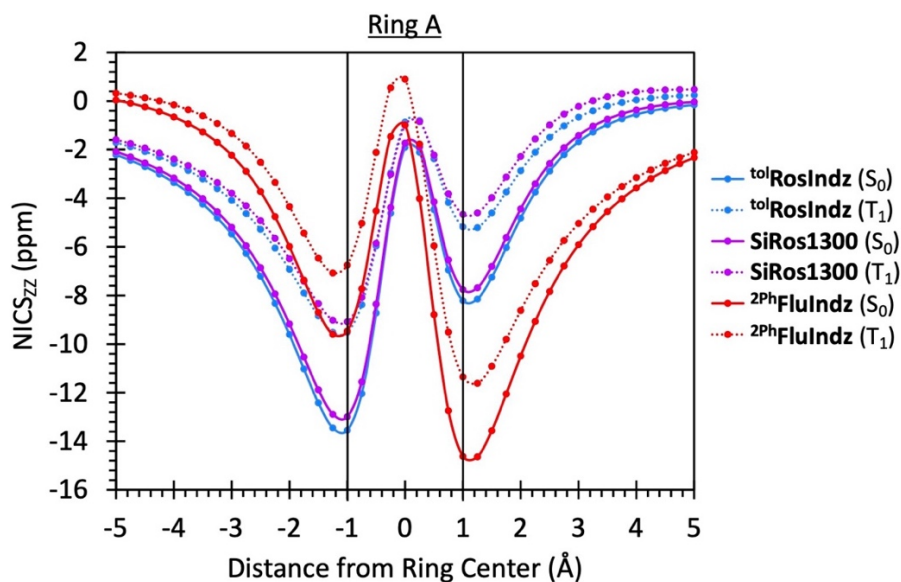

**Figure S14.** NICS<sub>ZZ</sub> (in ppm) versus distance from the center of ring A (in Å) of <sup>to1</sup>RosIndz, SiRos1300, and <sup>2Ph</sup>FluIndz. The S<sub>0</sub> (singlet ground state) calculations are shown as solid lines and the T<sub>1</sub> (first triplet state) calculations are shown as dashed lines. Vertical lines at +1 and -1 Å indicate the source of the values given in Figure 4 and the tables above. Note that the data curves are not symmetric about the y-axis because the two faces of the ring are not symmetry equivalent.

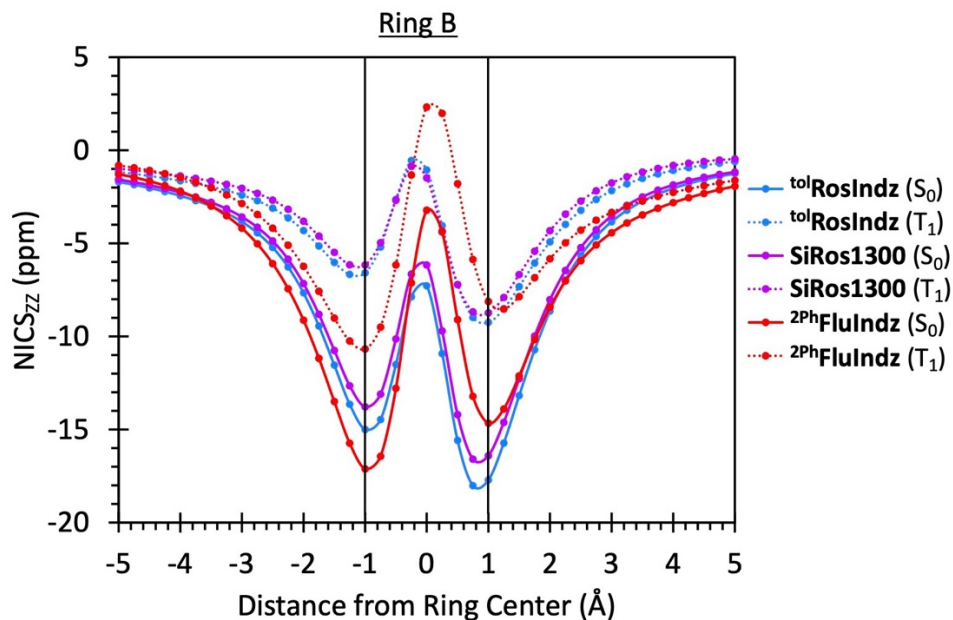

**Figure S15.** NICS<sub>ZZ</sub> (in ppm) versus distance from the center of ring B (in Å) of <sup>to1</sup>RosIndz, SiRos1300, and <sup>2Ph</sup>FluIndz. The S<sub>0</sub> (singlet ground state) calculations are shown as solid lines and the T<sub>1</sub> (first triplet state) calculations are shown as dashed lines. Vertical lines at +1 and -1 Å indicate the source of the values given in Figure 4 and the tables above. Note that the data curves are not symmetric about the y-axis because the two faces of the ring are not symmetry equivalent.

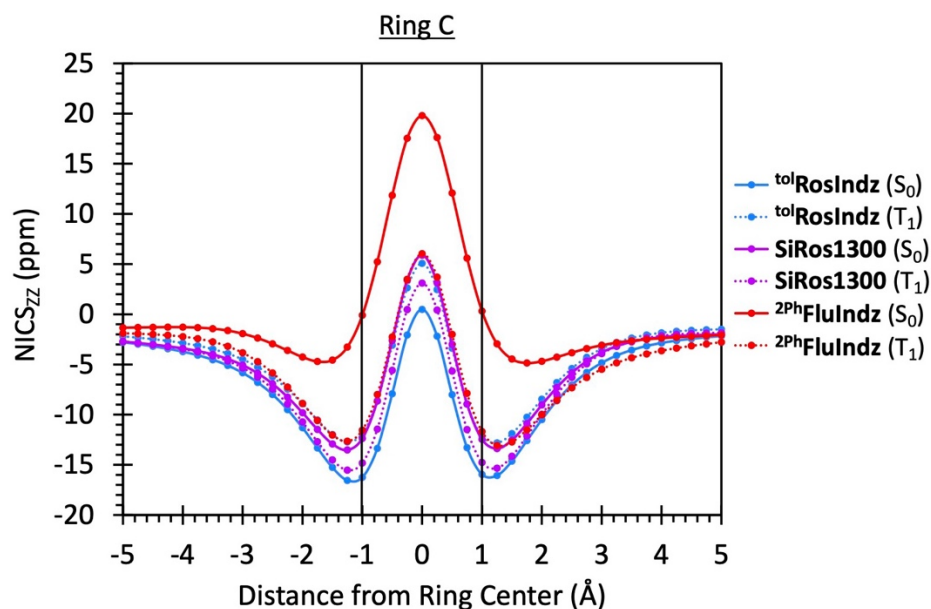

**Figure S16.** NICS<sub>ZZ</sub> (in ppm) versus distance from the center of ring C (in Å) of <sup>tol</sup>RosIndz, SiRos1300, and <sup>2Ph</sup>FluIndz. The S<sub>0</sub> (singlet ground state) calculations are shown as solid lines and the T<sub>1</sub> (first triplet state) calculations are shown as dashed lines. Vertical lines at +1 and -1 Å indicate the source of the values given in Figure 4 and the tables above.

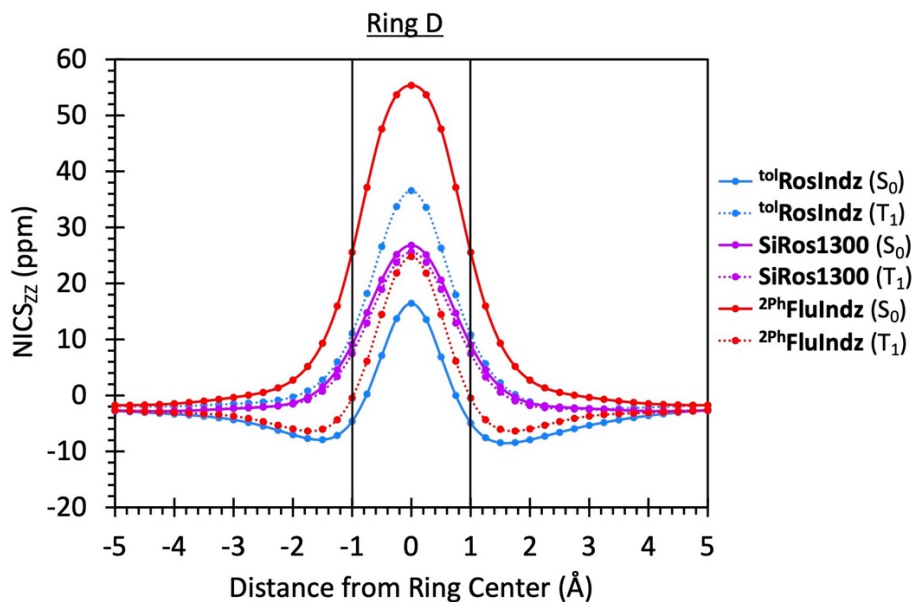

**Figure S17.** NICS<sub>ZZ</sub> (in ppm) versus distance from the center of ring D (in Å) of <sup>tol</sup>RosIndz, SiRos1300, and <sup>2Ph</sup>FluIndz. The S<sub>0</sub> (singlet ground state) calculations are shown as solid lines and the T<sub>1</sub> (first triplet state) calculations are shown as dashed lines. Vertical lines at +1 and -1 Å indicate the source of the values given in Figure 4 and the tables above.

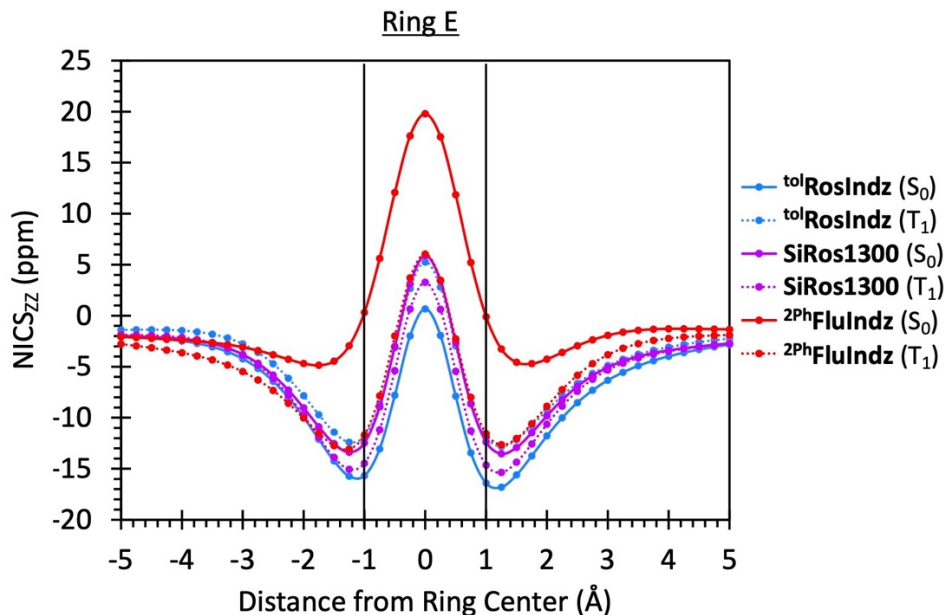

**Figure S18.** NICS<sub>ZZ</sub> (in ppm) versus distance from the center of ring E (in Å) of <sup>tol</sup>RosIndz, SiRos1300, and <sup>2Ph</sup>FluIndz. The S<sub>0</sub> (singlet ground state) calculations are shown as solid lines and the T<sub>1</sub> (first triplet state) calculations are shown as dashed lines. Vertical lines at +1 and -1 Å indicate the source of the values given in Figure 4 and the tables above.

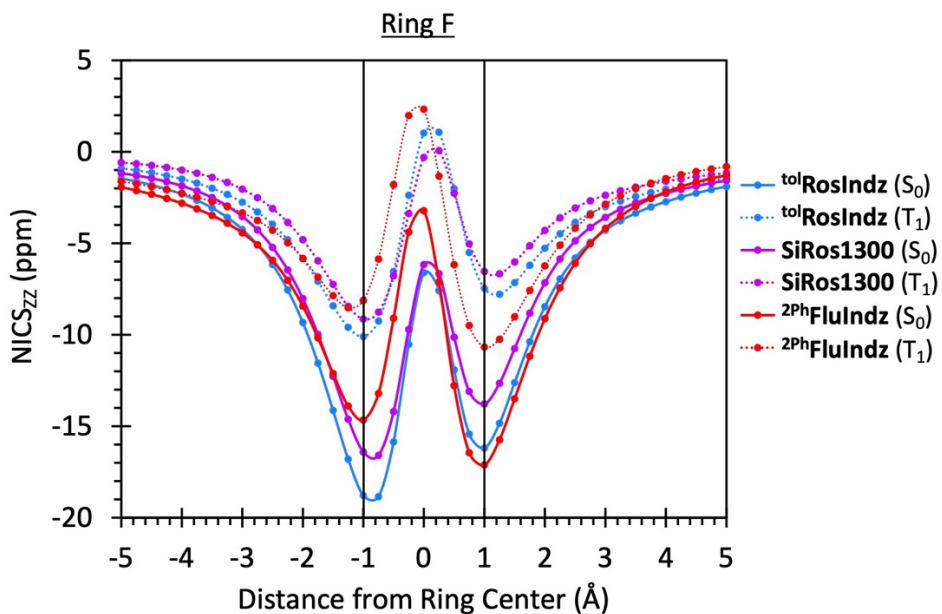

**Figure S19.** NICS<sub>ZZ</sub> (in ppm) versus distance from the center of ring F (in Å) of <sup>tol</sup>RosIndz, SiRos1300, and <sup>2Ph</sup>FluIndz. The S<sub>0</sub> (singlet ground state) calculations are shown as solid lines and the T<sub>1</sub> (first triplet state) calculations are shown as dashed lines. Vertical lines at +1 and -1 Å indicate the source of the values given in Figure 4 and the tables above. Note that the data curves are not symmetric about the y-axis because the two faces of the ring are not symmetry equivalent.



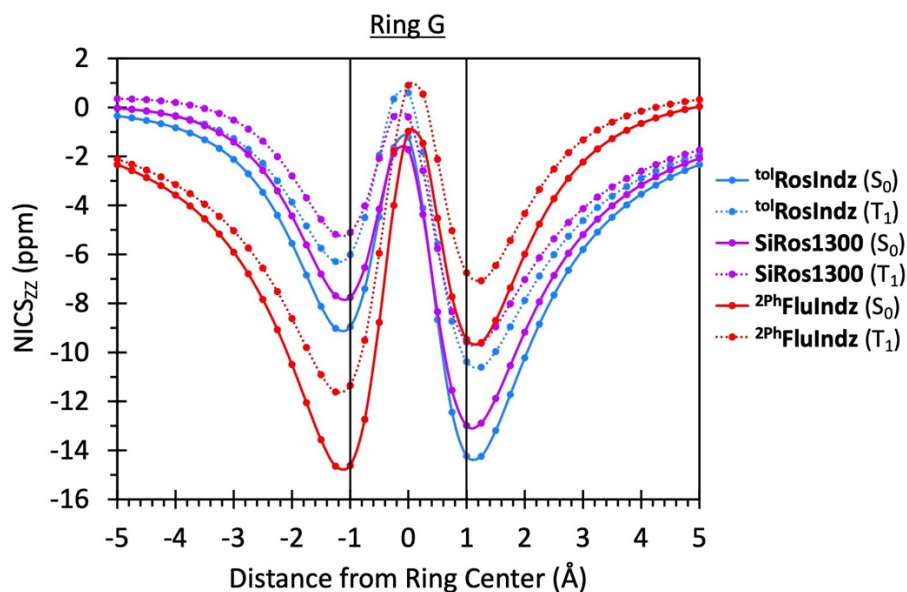

**Figure S20.** NICS<sub>ZZ</sub> (in ppm) versus distance from the center of ring G (in Å) of <sup>4l</sup>RosIndz, SiRos1300, and <sup>2Ph</sup>FluIndz. The S<sub>0</sub> (singlet ground state) calculations are shown as solid lines and the T<sub>1</sub> (first triplet state) calculations are shown as dashed lines. Vertical lines at +1 and -1 Å indicate the source of the values given in Figure 4 and the tables above. Note that the data curves are not symmetric about the y-axis because the two faces of the ring are not symmetry equivalent.

## CRYSTALLOGRAPHIC DATA

The obtained <sup>1</sup>Ph**FluIndz** crystals were thin, splintered shards. While diffraction with MoK(alpha) was observed to be weak, diffraction with CuK(alpha) provided sufficient, identifiable reflections at high enough resolution to allow for data collection. The structure was readily solved with the organic portion being well resolved. One PF<sub>6</sub><sup>-</sup> anion is observed to sit on a crystallographic inversion, meaning only half of the anion is present in each asymmetric unit and that another half anionic charge must be located elsewhere. In the remaining difference density, another PF<sub>6</sub><sup>-</sup> anion was observed, which must be present at half occupancy for the charges to match. The rest of the time this site is observed to be occupied by a disordered superposition of acetonitrile and diethyl ether. This unusual combination elucidated a deeper examination of reciprocal space to see if any cell doubling had been missed, however, no sensible doubling of the unit cell was discovered, so the partial anion/solvent overlap is not clearly resolved herein. This information is provided for full disclosure due to the uniqueness of the solved structure. However, it is emphasized that the chemically important part, the cation structure of <sup>1</sup>Ph**FluIndz**, is in agreement with the predicted structure and makes good chemical sense.

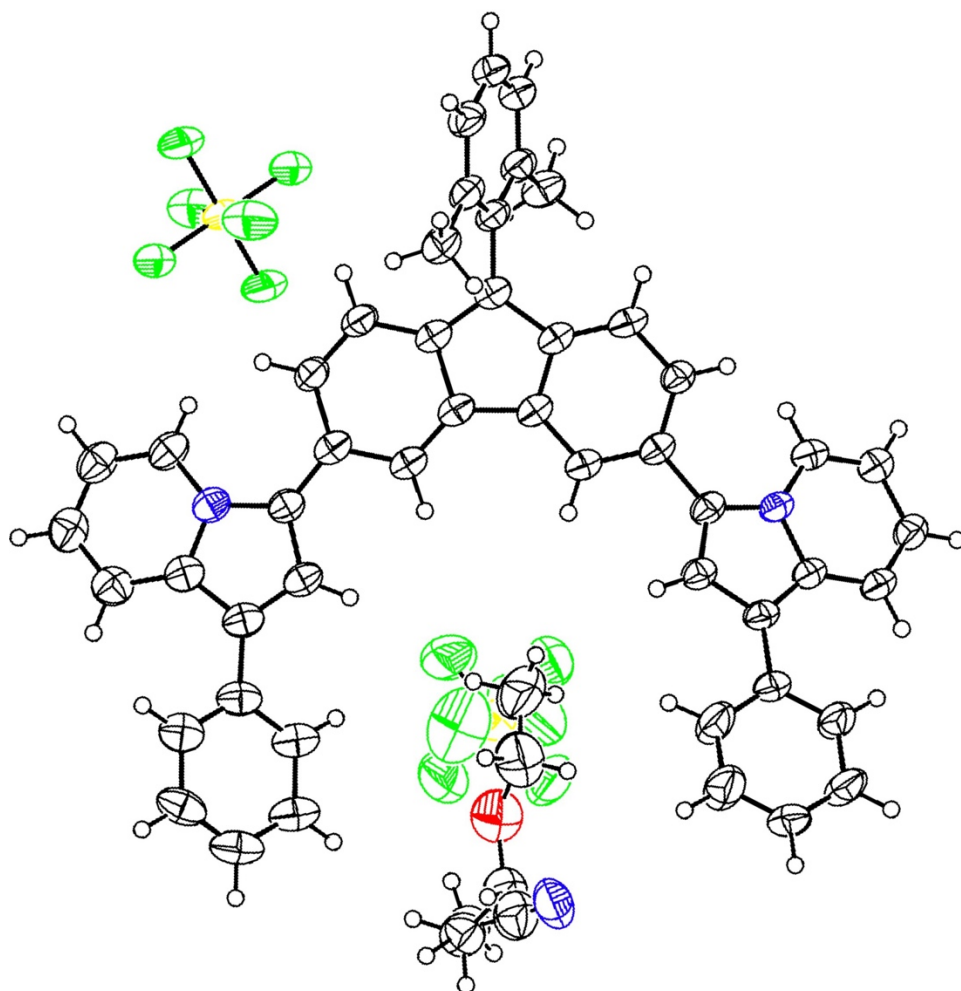

**Figure S21.** Thermal ellipsoid plot at 50% probability for a single <sup>1</sup>PhFluIndz molecule with added hydrogens, anions, and solvent molecules.

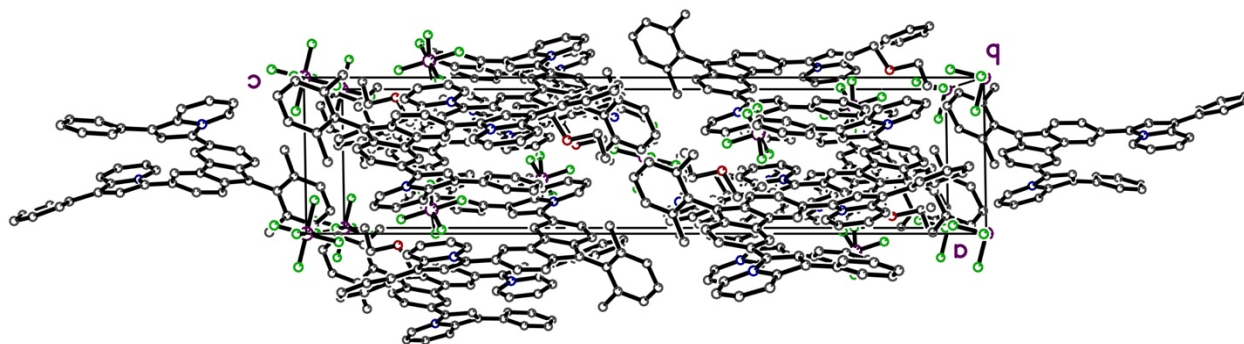

**Figure S22.** Perspective of the crystal packing structure for  $1^{\text{Ph}}\text{FluIndz}$ .

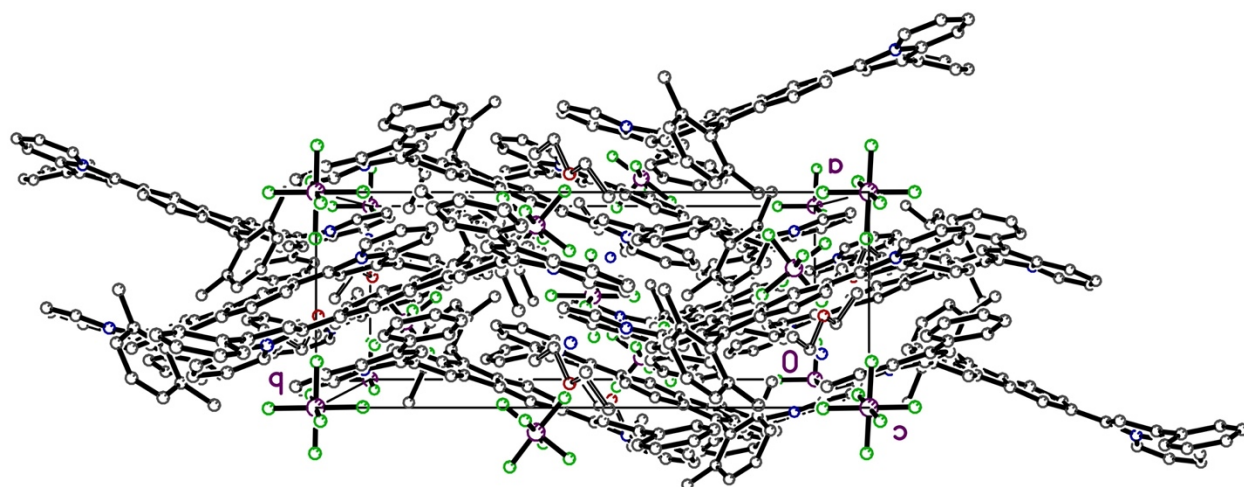

**Figure S23.** Perspective of the crystal packing structure for  $1^{\text{Ph}}\text{FluIndz}$ .

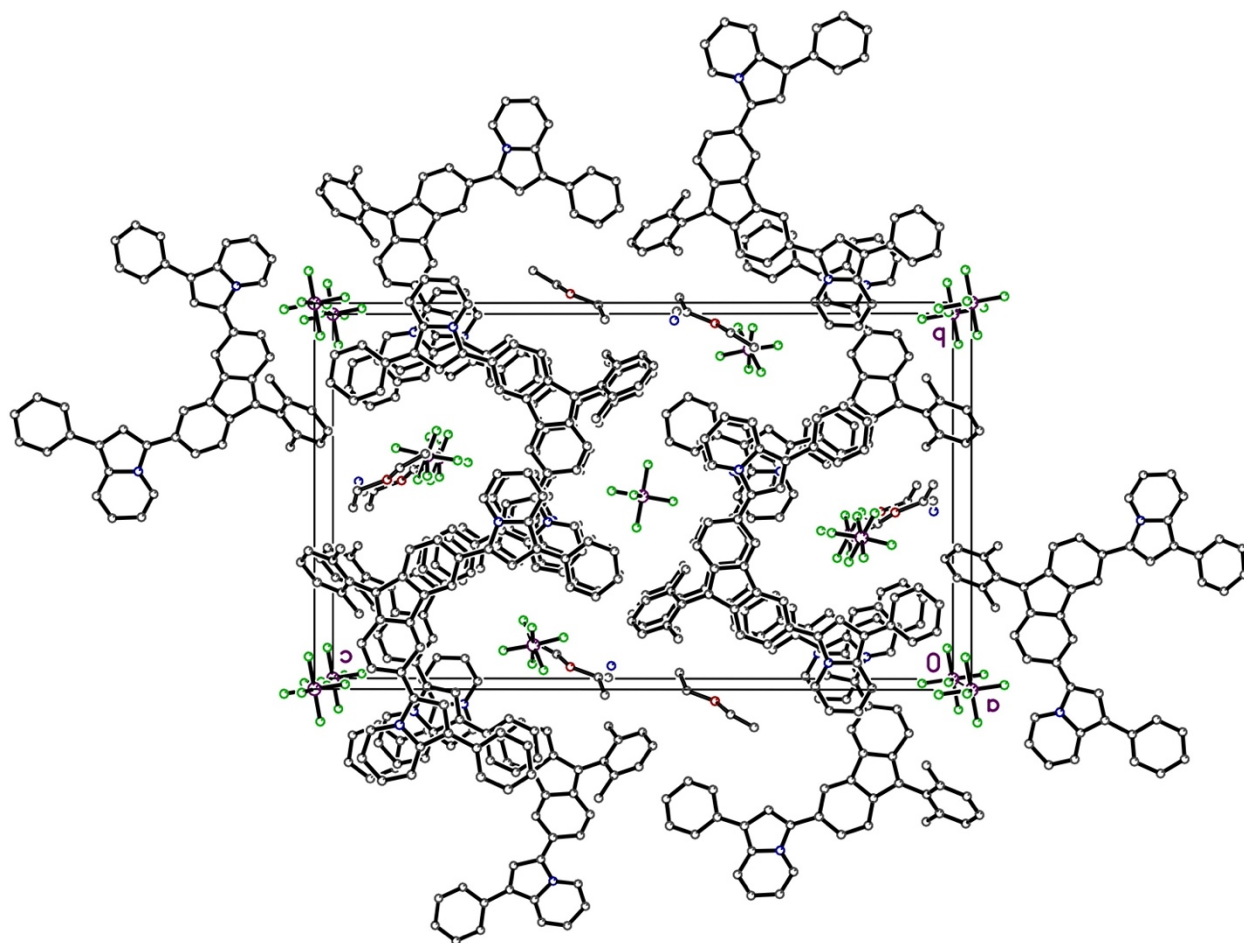

**Figure S24.** Perspective of the crystal packing structure for <sup>1</sup>PhFluIndz.

**Table S10.** Atomic coordinates for crystallography of <sup>1</sup>PhFluIndz.

| Number | Label | Xfrac + ESD | Yfrac + ESD | Zfrac + ESD | Symm. op. |
|--------|-------|-------------|-------------|-------------|-----------|
| 1      | N1    | 0.8485(3)   | 0.06539(16) | 0.21431(8)  | x,y,z     |
| 2      | N3    | 1.1971(4)   | 0.56761(17) | 0.35457(9)  | x,y,z     |
| 3      | C1    | 0.8399(5)   | 0.2438(2)   | 0.39787(10) | x,y,z     |
| 4      | C2    | 0.8269(4)   | 0.2047(2)   | 0.35804(9)  | x,y,z     |
| 5      | C3    | 0.7615(4)   | 0.1360(2)   | 0.34885(9)  | x,y,z     |
| 6      | H3    | 0.71754     | 0.105647    | 0.370793    | x,y,z     |
| 7      | C4    | 0.7610(4)   | 0.1120(2)   | 0.30702(9)  | x,y,z     |
| 8      | H4    | 0.717864    | 0.0647      | 0.300714    | x,y,z     |
| 9      | C5    | 0.8228(4)   | 0.15606(19) | 0.27396(9)  | x,y,z     |
| 10     | C6    | 0.8888(4)   | 0.2266(2)   | 0.28362(9)  | x,y,z     |
| 11     | H6    | 0.930469    | 0.257518    | 0.261719    | x,y,z     |
| 12     | C7    | 0.8914(4)   | 0.24941(19) | 0.32491(9)  | x,y,z     |
| 13     | C8    | 0.9522(4)   | 0.3180(2)   | 0.34453(9)  | x,y,z     |
| 14     | C9    | 1.0236(4)   | 0.3791(2)   | 0.32804(10) | x,y,z     |
| 15     | H9    | 1.045091    | 0.381985    | 0.298461    | x,y,z     |
| 16     | C10   | 1.0676(4)   | 0.4402(2)   | 0.35508(10) | x,y,z     |
| 17     | C11   | 1.0338(5)   | 0.4321(2)   | 0.39966(10) | x,y,z     |
| 18     | H11   | 1.0645      | 0.470829    | 0.418222    | x,y,z     |
| 19     | C12   | 0.9595(5)   | 0.3709(2)   | 0.41623(10) | x,y,z     |
| 20     | H12   | 0.93623     | 0.368148    | 0.445737    | x,y,z     |
| 21     | C13   | 0.9167(4)   | 0.3114(2)   | 0.38960(9)  | x,y,z     |
| 22     | C14   | 0.7719(5)   | 0.2175(2)   | 0.43922(9)  | x,y,z     |
| 23     | C15   | 0.8680(5)   | 0.1627(2)   | 0.46142(10) | x,y,z     |
| 24     | C16   | 0.8005(6)   | 0.1396(2)   | 0.50026(11) | x,y,z     |
| 25     | H16   | 0.864232    | 0.103024    | 0.515775    | x,y,z     |
| 26     | C17   | 0.6396(6)   | 0.1701(2)   | 0.51642(11) | x,y,z     |
| 27     | H17   | 0.594645    | 0.154028    | 0.542944    | x,y,z     |
| 28     | C18   | 0.5459(5)   | 0.2228(2)   | 0.49448(11) | x,y,z     |
| 29     | H18   | 0.436286    | 0.242705    | 0.505987    | x,y,z     |
| 30     | C19   | 0.6087(5)   | 0.2480(2)   | 0.45533(10) | x,y,z     |
| 31     | C20   | 1.0461(5)   | 0.1320(2)   | 0.44545(12) | x,y,z     |
| 32     | H20A  | 1.094832    | 0.096595    | 0.465888    | x,y,z     |
| 33     | H20B  | 1.13636     | 0.170927    | 0.441954    | x,y,z     |
| 34     | H20C  | 1.023216    | 0.108225    | 0.418086    | x,y,z     |
| 35     | C21   | 0.5011(5)   | 0.3048(2)   | 0.43175(11) | x,y,z     |
| 36     | H21A  | 0.375953    | 0.307911    | 0.443165    | x,y,z     |
| 37     | H21B  | 0.493469    | 0.292021    | 0.401618    | x,y,z     |

|    |      |            |             |             |       |
|----|------|------------|-------------|-------------|-------|
| 38 | H21C | 0.563442   | 0.351501    | 0.435036    | x,y,z |
| 39 | C22  | 0.8128(4)  | 0.1343(2)   | 0.22942(9)  | x,y,z |
| 40 | C23  | 0.7595(4)  | 0.1759(2)   | 0.19512(9)  | x,y,z |
| 41 | H23  | 0.72666    | 0.2255      | 0.196457    | x,y,z |
| 42 | C24  | 0.7609(4)  | 0.1343(2)   | 0.15787(9)  | x,y,z |
| 43 | C25  | 0.8209(4)  | 0.06497(19) | 0.16979(9)  | x,y,z |
| 44 | C26  | 0.8645(4)  | 0.0002(2)   | 0.14821(10) | x,y,z |
| 45 | H26  | 0.850984   | -0.001868   | 0.118223    | x,y,z |
| 46 | C27  | 0.9253(5)  | -0.0588(2)  | 0.1698(1)   | x,y,z |
| 47 | H27  | 0.952488   | -0.101994   | 0.154926    | x,y,z |
| 48 | C28  | 0.9485(5)  | -0.0561(2)  | 0.21468(10) | x,y,z |
| 49 | H28  | 0.990195   | -0.097552   | 0.229783    | x,y,z |
| 50 | C29  | 0.9113(5)  | 0.0053(2)   | 0.23561(10) | x,y,z |
| 51 | H29  | 0.928704   | 0.007169    | 0.26551     | x,y,z |
| 52 | C30  | 0.7007(4)  | 0.1602(2)   | 0.11562(9)  | x,y,z |
| 53 | C31  | 0.6742(7)  | 0.1162(2)   | 0.08129(12) | x,y,z |
| 54 | H31  | 0.699661   | 0.066096    | 0.08423     | x,y,z |
| 55 | C32  | 0.6110(6)  | 0.1420(3)   | 0.04197(12) | x,y,z |
| 56 | H32  | 0.595269   | 0.109632    | 0.018838    | x,y,z |
| 57 | C33  | 0.5719(5)  | 0.2134(2)   | 0.03670(11) | x,y,z |
| 58 | H33  | 0.525666   | 0.231335    | 0.010364    | x,y,z |
| 59 | C34  | 0.6009(10) | 0.2583(3)   | 0.07032(15) | x,y,z |
| 60 | H34  | 0.57514    | 0.308316    | 0.067199    | x,y,z |
| 61 | C35  | 0.6666(9)  | 0.2330(3)   | 0.10865(14) | x,y,z |
| 62 | H35  | 0.689361   | 0.266405    | 0.131029    | x,y,z |
| 63 | C36  | 1.1266(4)  | 0.5036(2)   | 0.3352(1)   | x,y,z |
| 64 | C37  | 1.1132(5)  | 0.5204(2)   | 0.29107(10) | x,y,z |
| 65 | H37  | 1.075099   | 0.487234    | 0.269653    | x,y,z |
| 66 | C38  | 1.1622(4)  | 0.5898(2)   | 0.28382(11) | x,y,z |
| 67 | C39  | 1.2164(5)  | 0.6208(2)   | 0.32386(11) | x,y,z |
| 68 | C40  | 1.2869(5)  | 0.6876(2)   | 0.33521(13) | x,y,z |
| 69 | H40  | 1.300475   | 0.724322    | 0.314469    | x,y,z |
| 70 | C41  | 1.3374(5)  | 0.7005(3)   | 0.37689(13) | x,y,z |
| 71 | H41  | 1.380027   | 0.746952    | 0.385267    | x,y,z |
| 72 | C42  | 1.3258(5)  | 0.6454(2)   | 0.40654(12) | x,y,z |
| 73 | H42  | 1.364074   | 0.653955    | 0.435065    | x,y,z |
| 74 | C43  | 1.2600(5)  | 0.5791(2)   | 0.39506(11) | x,y,z |
| 75 | H43  | 1.257924   | 0.540938    | 0.415195    | x,y,z |
| 76 | C44  | 1.1685(5)  | 0.6266(2)   | 0.24219(11) | x,y,z |

|     |      |             |             |             |             |
|-----|------|-------------|-------------|-------------|-------------|
| 77  | C45  | 1.1283(5)   | 0.6997(2)   | 0.23680(13) | x,y,z       |
| 78  | H45  | 1.094426    | 0.728349    | 0.260409    | x,y,z       |
| 79  | C46  | 1.1380(5)   | 0.7303(3)   | 0.19673(14) | x,y,z       |
| 80  | H46  | 1.110563    | 0.78021     | 0.193312    | x,y,z       |
| 81  | C47  | 1.1861(5)   | 0.6906(3)   | 0.16205(13) | x,y,z       |
| 82  | H47  | 1.193293    | 0.71264     | 0.134926    | x,y,z       |
| 83  | C48  | 1.2240(5)   | 0.6181(3)   | 0.16704(12) | x,y,z       |
| 84  | H48  | 1.256287    | 0.589813    | 0.143141    | x,y,z       |
| 85  | C49  | 1.2154(5)   | 0.5863(3)   | 0.20665(11) | x,y,z       |
| 86  | H49  | 1.241814    | 0.536232    | 0.209658    | x,y,z       |
| 87  | P1   | 0.5         | 0.5         | 0.5         | x,y,z       |
| 88  | F1   | 0.5526(6)   | 0.48597(16) | 0.45188(7)  | x,y,z       |
| 89  | F2   | 0.5019(5)   | 0.58408(15) | 0.49103(8)  | x,y,z       |
| 90  | F3   | 0.2857(5)   | 0.49692(19) | 0.48721(10) | x,y,z       |
| 91  | F1   | 0.4474(6)   | 0.51403(16) | 0.54812(7)  | 1-x,1-y,1-z |
| 92  | F2   | 0.4981(5)   | 0.41592(15) | 0.50897(8)  | 1-x,1-y,1-z |
| 93  | F3   | 0.7143(5)   | 0.50308(19) | 0.51279(10) | 1-x,1-y,1-z |
| 94  | P2   | 0.1454(4)   | 0.39384(15) | 0.16934(8)  | x,y,z       |
| 95  | F4   | -0.0196(12) | 0.4475(6)   | 0.1728(3)   | x,y,z       |
| 96  | F5   | 0.2079(12)  | 0.4064(4)   | 0.2154(2)   | x,y,z       |
| 97  | F6   | 0.0137(9)   | 0.3304(3)   | 0.1863(2)   | x,y,z       |
| 98  | F7   | 0.3133(11)  | 0.3443(5)   | 0.1698(4)   | x,y,z       |
| 99  | F8   | 0.081(2)    | 0.3748(4)   | 0.1227(2)   | x,y,z       |
| 100 | F9   | 0.2698(15)  | 0.4565(4)   | 0.1525(3)   | x,y,z       |
| 101 | C1E  | 0.800(3)    | 0.3916(8)   | 0.1733(4)   | x,y,z       |
| 102 | H1EA | 0.694652    | 0.371894    | 0.188611    | x,y,z       |
| 103 | H1EB | 0.883113    | 0.352126    | 0.165269    | x,y,z       |
| 104 | H1EC | 0.867788    | 0.425736    | 0.191578    | x,y,z       |
| 105 | C2E  | 0.736(2)    | 0.4278(8)   | 0.1363(5)   | x,y,z       |
| 106 | H2EA | 0.651357    | 0.467641    | 0.144041    | x,y,z       |
| 107 | H2EB | 0.666739    | 0.393755    | 0.117635    | x,y,z       |
| 108 | O1E  | 0.9031(13)  | 0.4575(5)   | 0.1134(2)   | x,y,z       |
| 109 | C3E  | 0.860(3)    | 0.4863(12)  | 0.0693(4)   | x,y,z       |
| 110 | H3EA | 0.84434     | 0.446066    | 0.048845    | x,y,z       |
| 111 | H3EB | 0.745856    | 0.515654    | 0.069147    | x,y,z       |
| 112 | C4E  | 1.016(5)    | 0.530(2)    | 0.0585(12)  | x,y,z       |
| 113 | H4EA | 0.99668     | 0.54987     | 0.030058    | x,y,z       |
| 114 | H4EB | 1.030123    | 0.568885    | 0.079084    | x,y,z       |
| 115 | H4EC | 1.128044    | 0.499695    | 0.058898    | x,y,z       |



|     |      |            |            |            |       |
|-----|------|------------|------------|------------|-------|
| 116 | C1S  | 1.030(5)   | 0.521(2)   | 0.0614(12) | x,y,z |
| 117 | H1SA | 1.068003   | 0.512642   | 0.090962   | x,y,z |
| 118 | H1SB | 1.023767   | 0.572663   | 0.055712   | x,y,z |
| 119 | H1SC | 1.119402   | 0.498166   | 0.042542   | x,y,z |
| 120 | C2S  | 0.842(3)   | 0.4877(12) | 0.0537(5)  | x,y,z |
| 121 | N1S  | 0.7037(13) | 0.4599(5)  | 0.0493(3)  | x,y,z |

**Table S11.** Bond lengths for crystallography of <sup>1</sup>PhFluIndz.

| Number | Atom1 | Atom2 | Type    | Polymeric | Cyclicity | Length   | SybylType |
|--------|-------|-------|---------|-----------|-----------|----------|-----------|
| 1      | N1    | C22   | Unknown | no        | cyclic    | 1.388(5) | 1         |
| 2      | N1    | C25   | Unknown | no        | cyclic    | 1.415(4) | 1         |
| 3      | N1    | C29   | Unknown | no        | cyclic    | 1.373(5) | 1         |
| 4      | N3    | C36   | Unknown | no        | cyclic    | 1.423(5) | 1         |
| 5      | N3    | C39   | Unknown | no        | cyclic    | 1.390(5) | 1         |
| 6      | N3    | C43   | Unknown | no        | cyclic    | 1.365(4) | 1         |
| 7      | C1    | C2    | Unknown | no        | cyclic    | 1.452(5) | un        |
| 8      | C1    | C13   | Unknown | no        | cyclic    | 1.395(5) | un        |
| 9      | C1    | C14   | Unknown | no        | acyclic   | 1.483(4) | un        |
| 10     | C2    | C3    | Unknown | no        | cyclic    | 1.386(5) | un        |
| 11     | C2    | C7    | Unknown | no        | cyclic    | 1.418(4) | un        |
| 12     | C3    | H3    | Unknown | no        | acyclic   | 0.95     | 1         |
| 13     | C3    | C4    | Unknown | no        | cyclic    | 1.392(4) | un        |
| 14     | C4    | H4    | Unknown | no        | acyclic   | 0.949    | 1         |
| 15     | C4    | C5    | Unknown | no        | cyclic    | 1.403(4) | un        |
| 16     | C5    | C6    | Unknown | no        | cyclic    | 1.421(5) | un        |
| 17     | C5    | C22   | Unknown | no        | acyclic   | 1.462(4) | un        |
| 18     | C6    | H6    | Unknown | no        | acyclic   | 0.95     | 1         |
| 19     | C6    | C7    | Unknown | no        | cyclic    | 1.369(4) | un        |
| 20     | C7    | C8    | Unknown | no        | cyclic    | 1.476(5) | un        |
| 21     | C8    | C9    | Unknown | no        | cyclic    | 1.351(5) | un        |
| 22     | C8    | C13   | Unknown | no        | cyclic    | 1.454(4) | un        |
| 23     | C9    | H9    | Unknown | no        | acyclic   | 0.95     | 1         |
| 24     | C9    | C10   | Unknown | no        | cyclic    | 1.449(5) | un        |
| 25     | C10   | C11   | Unknown | no        | cyclic    | 1.439(4) | un        |
| 26     | C10   | C36   | Unknown | no        | acyclic   | 1.400(5) | un        |
| 27     | C11   | H11   | Unknown | no        | acyclic   | 0.95     | 1         |
| 28     | C11   | C12   | Unknown | no        | cyclic    | 1.362(5) | un        |
| 29     | C12   | H12   | Unknown | no        | acyclic   | 0.95     | 1         |
| 30     | C12   | C13   | Unknown | no        | cyclic    | 1.416(5) | un        |

|    |     |      |         |    |         |          |    |
|----|-----|------|---------|----|---------|----------|----|
| 31 | C14 | C15  | Unknown | no | cyclic  | 1.409(5) | un |
| 32 | C14 | C19  | Unknown | no | cyclic  | 1.409(5) | un |
| 33 | C15 | C16  | Unknown | no | cyclic  | 1.393(5) | un |
| 34 | C15 | C20  | Unknown | no | acyclic | 1.501(5) | 1  |
| 35 | C16 | H16  | Unknown | no | acyclic | 0.95     | 1  |
| 36 | C16 | C17  | Unknown | no | cyclic  | 1.396(6) | un |
| 37 | C17 | H17  | Unknown | no | acyclic | 0.95     | 1  |
| 38 | C17 | C18  | Unknown | no | cyclic  | 1.369(5) | un |
| 39 | C18 | H18  | Unknown | no | acyclic | 0.951    | 1  |
| 40 | C18 | C19  | Unknown | no | cyclic  | 1.402(5) | un |
| 41 | C19 | C21  | Unknown | no | acyclic | 1.498(5) | 1  |
| 42 | C20 | H20A | Unknown | no | acyclic | 0.981    | 1  |
| 43 | C20 | H20B | Unknown | no | acyclic | 0.979    | 1  |
| 44 | C20 | H20C | Unknown | no | acyclic | 0.98     | 1  |
| 45 | C21 | H21A | Unknown | no | acyclic | 0.98     | 1  |
| 46 | C21 | H21B | Unknown | no | acyclic | 0.98     | 1  |
| 47 | C21 | H21C | Unknown | no | acyclic | 0.979    | 1  |
| 48 | C22 | C23  | Unknown | no | cyclic  | 1.378(4) | un |
| 49 | C23 | H23  | Unknown | no | acyclic | 0.949    | 1  |
| 50 | C23 | C24  | Unknown | no | cyclic  | 1.405(4) | un |
| 51 | C24 | C25  | Unknown | no | cyclic  | 1.404(5) | un |
| 52 | C24 | C30  | Unknown | no | acyclic | 1.475(4) | un |
| 53 | C25 | C26  | Unknown | no | cyclic  | 1.417(5) | un |
| 54 | C26 | H26  | Unknown | no | acyclic | 0.95     | 1  |
| 55 | C26 | C27  | Unknown | no | cyclic  | 1.356(5) | un |
| 56 | C27 | H27  | Unknown | no | acyclic | 0.949    | 1  |
| 57 | C27 | C28  | Unknown | no | cyclic  | 1.424(4) | un |
| 58 | C28 | H28  | Unknown | no | acyclic | 0.95     | 1  |
| 59 | C28 | C29  | Unknown | no | cyclic  | 1.344(5) | un |
| 60 | C29 | H29  | Unknown | no | acyclic | 0.95     | 1  |
| 61 | C30 | C31  | Unknown | no | cyclic  | 1.366(5) | un |
| 62 | C30 | C35  | Unknown | no | cyclic  | 1.387(7) | un |
| 63 | C31 | H31  | Unknown | no | acyclic | 0.95     | 1  |
| 64 | C31 | C32  | Unknown | no | cyclic  | 1.398(6) | un |
| 65 | C32 | H32  | Unknown | no | acyclic | 0.95     | 1  |
| 66 | C32 | C33  | Unknown | no | cyclic  | 1.361(7) | un |
| 67 | C33 | H33  | Unknown | no | acyclic | 0.95     | 1  |
| 68 | C33 | C34  | Unknown | no | cyclic  | 1.361(6) | un |
| 69 | C34 | H34  | Unknown | no | acyclic | 0.949    | 1  |

|    |     |     |         |    |         |          |    |
|----|-----|-----|---------|----|---------|----------|----|
| 70 | C34 | C35 | Unknown | no | cyclic  | 1.374(7) | un |
| 71 | C35 | H35 | Unknown | no | acyclic | 0.951    | 1  |
| 72 | C36 | C37 | Unknown | no | cyclic  | 1.428(4) | un |
| 73 | C37 | H37 | Unknown | no | acyclic | 0.95     | 1  |
| 74 | C37 | C38 | Unknown | no | cyclic  | 1.353(5) | un |
| 75 | C38 | C39 | Unknown | no | cyclic  | 1.436(5) | un |
| 76 | C38 | C44 | Unknown | no | acyclic | 1.481(5) | un |
| 77 | C39 | C40 | Unknown | no | cyclic  | 1.382(5) | un |
| 78 | C40 | H40 | Unknown | no | acyclic | 0.95     | 1  |
| 79 | C40 | C41 | Unknown | no | cyclic  | 1.379(6) | un |
| 80 | C41 | H41 | Unknown | no | acyclic | 0.949    | 1  |
| 81 | C41 | C42 | Unknown | no | cyclic  | 1.387(6) | un |
| 82 | C42 | H42 | Unknown | no | acyclic | 0.95     | 1  |
| 83 | C42 | C43 | Unknown | no | cyclic  | 1.363(5) | un |
| 84 | C43 | H43 | Unknown | no | acyclic | 0.95     | 1  |
| 85 | C44 | C45 | Unknown | no | cyclic  | 1.394(5) | un |
| 86 | C44 | C49 | Unknown | no | cyclic  | 1.393(5) | un |
| 87 | C45 | H45 | Unknown | no | acyclic | 0.95     | 1  |
| 88 | C45 | C46 | Unknown | no | cyclic  | 1.388(6) | un |
| 89 | C46 | H46 | Unknown | no | acyclic | 0.951    | 1  |
| 90 | C46 | C47 | Unknown | no | cyclic  | 1.368(7) | un |
| 91 | C47 | H47 | Unknown | no | acyclic | 0.95     | 1  |
| 92 | C47 | C48 | Unknown | no | cyclic  | 1.378(8) | un |
| 93 | C48 | H48 | Unknown | no | acyclic | 0.95     | 1  |
| 94 | C48 | C49 | Unknown | no | cyclic  | 1.383(6) | un |
| 95 | C49 | H49 | Unknown | no | acyclic | 0.951    | 1  |

**Table S12.** Bond angles for crystallography of <sup>1</sup>PhFluIndz.

| Number | Atom1 | Atom2 | Atom3 | Angle    |
|--------|-------|-------|-------|----------|
| 1      | C22   | N1    | C25   | 108.8(2) |
| 2      | C22   | N1    | C29   | 129.7(3) |
| 3      | C25   | N1    | C29   | 121.4(3) |
| 4      | C36   | N3    | C39   | 109.3(3) |
| 5      | C36   | N3    | C43   | 130.0(3) |
| 6      | C39   | N3    | C43   | 120.4(3) |
| 7      | C2    | C1    | C13   | 107.8(3) |
| 8      | C2    | C1    | C14   | 125.4(3) |
| 9      | C13   | C1    | C14   | 126.7(3) |
| 10     | C1    | C2    | C3    | 131.0(3) |

|    |     |     |     |          |
|----|-----|-----|-----|----------|
| 11 | C1  | C2  | C7  | 109.2(3) |
| 12 | C3  | C2  | C7  | 119.8(3) |
| 13 | C2  | C3  | H3  | 120.5    |
| 14 | C2  | C3  | C4  | 119.1(3) |
| 15 | H3  | C3  | C4  | 120.4    |
| 16 | C3  | C4  | H4  | 119.2    |
| 17 | C3  | C4  | C5  | 121.5(3) |
| 18 | H4  | C4  | C5  | 119.2    |
| 19 | C4  | C5  | C6  | 119.0(3) |
| 20 | C4  | C5  | C22 | 122.9(3) |
| 21 | C6  | C5  | C22 | 118.0(3) |
| 22 | C5  | C6  | H6  | 120.5    |
| 23 | C5  | C6  | C7  | 119.1(3) |
| 24 | H6  | C6  | C7  | 120.4    |
| 25 | C2  | C7  | C6  | 121.4(3) |
| 26 | C2  | C7  | C8  | 107.0(3) |
| 27 | C6  | C7  | C8  | 131.6(3) |
| 28 | C7  | C8  | C9  | 132.2(3) |
| 29 | C7  | C8  | C13 | 106.4(3) |
| 30 | C9  | C8  | C13 | 121.4(3) |
| 31 | C8  | C9  | H9  | 119.7    |
| 32 | C8  | C9  | C10 | 120.6(3) |
| 33 | H9  | C9  | C10 | 119.8    |
| 34 | C9  | C10 | C11 | 117.1(3) |
| 35 | C9  | C10 | C36 | 117.1(3) |
| 36 | C11 | C10 | C36 | 125.6(3) |
| 37 | C10 | C11 | H11 | 118.8    |
| 38 | C10 | C11 | C12 | 122.4(3) |
| 39 | H11 | C11 | C12 | 118.8    |
| 40 | C11 | C12 | H12 | 119.9    |
| 41 | C11 | C12 | C13 | 120.2(3) |
| 42 | H12 | C12 | C13 | 119.9    |
| 43 | C1  | C13 | C8  | 109.6(3) |
| 44 | C1  | C13 | C12 | 132.1(3) |
| 45 | C8  | C13 | C12 | 118.3(3) |
| 46 | C1  | C14 | C15 | 120.4(3) |
| 47 | C1  | C14 | C19 | 118.5(3) |
| 48 | C15 | C14 | C19 | 121.1(3) |
| 49 | C14 | C15 | C16 | 118.8(3) |

|    |      |     |      |          |
|----|------|-----|------|----------|
| 50 | C14  | C15 | C20  | 121.6(3) |
| 51 | C16  | C15 | C20  | 119.6(3) |
| 52 | C15  | C16 | H16  | 119.9    |
| 53 | C15  | C16 | C17  | 120.2(3) |
| 54 | H16  | C16 | C17  | 120      |
| 55 | C16  | C17 | H17  | 119.6    |
| 56 | C16  | C17 | C18  | 120.7(4) |
| 57 | H17  | C17 | C18  | 119.7    |
| 58 | C17  | C18 | H18  | 119.4    |
| 59 | C17  | C18 | C19  | 121.2(3) |
| 60 | H18  | C18 | C19  | 119.4    |
| 61 | C14  | C19 | C18  | 118.0(3) |
| 62 | C14  | C19 | C21  | 122.2(3) |
| 63 | C18  | C19 | C21  | 119.9(3) |
| 64 | C15  | C20 | H20A | 109.4    |
| 65 | C15  | C20 | H20B | 109.6    |
| 66 | C15  | C20 | H20C | 109.4    |
| 67 | H20A | C20 | H20B | 109.5    |
| 68 | H20A | C20 | H20C | 109.4    |
| 69 | H20B | C20 | H20C | 109.5    |
| 70 | C19  | C21 | H21A | 109.4    |
| 71 | C19  | C21 | H21B | 109.4    |
| 72 | C19  | C21 | H21C | 109.5    |
| 73 | H21A | C21 | H21B | 109.5    |
| 74 | H21A | C21 | H21C | 109.5    |
| 75 | H21B | C21 | H21C | 109.5    |
| 76 | N1   | C22 | C5   | 125.2(3) |
| 77 | N1   | C22 | C23  | 107.2(3) |
| 78 | C5   | C22 | C23  | 127.5(3) |
| 79 | C22  | C23 | H23  | 124.9    |
| 80 | C22  | C23 | C24  | 110.2(3) |
| 81 | H23  | C23 | C24  | 124.9    |
| 82 | C23  | C24 | C25  | 106.5(3) |
| 83 | C23  | C24 | C30  | 124.8(3) |
| 84 | C25  | C24 | C30  | 128.6(3) |
| 85 | N1   | C25 | C24  | 107.4(3) |
| 86 | N1   | C25 | C26  | 116.9(3) |
| 87 | C24  | C25 | C26  | 135.7(3) |
| 88 | C25  | C26 | H26  | 119.5    |

|     |     |     |     |          |
|-----|-----|-----|-----|----------|
| 89  | C25 | C26 | C27 | 120.9(3) |
| 90  | H26 | C26 | C27 | 119.6    |
| 91  | C26 | C27 | H27 | 119.9    |
| 92  | C26 | C27 | C28 | 120.2(3) |
| 93  | H27 | C27 | C28 | 119.9    |
| 94  | C27 | C28 | H28 | 120.1    |
| 95  | C27 | C28 | C29 | 119.8(3) |
| 96  | H28 | C28 | C29 | 120.1    |
| 97  | N1  | C29 | C28 | 120.8(3) |
| 98  | N1  | C29 | H29 | 119.6    |
| 99  | C28 | C29 | H29 | 119.6    |
| 100 | C24 | C30 | C31 | 123.9(3) |
| 101 | C24 | C30 | C35 | 120.5(3) |
| 102 | C31 | C30 | C35 | 115.6(4) |
| 103 | C30 | C31 | H31 | 118.7    |
| 104 | C30 | C31 | C32 | 122.6(4) |
| 105 | H31 | C31 | C32 | 118.7    |
| 106 | C31 | C32 | H32 | 119.9    |
| 107 | C31 | C32 | C33 | 120.3(4) |
| 108 | H32 | C32 | C33 | 119.8    |
| 109 | C32 | C33 | H33 | 121      |
| 110 | C32 | C33 | C34 | 118.0(4) |
| 111 | H33 | C33 | C34 | 121      |
| 112 | C33 | C34 | H34 | 119.2    |
| 113 | C33 | C34 | C35 | 121.6(5) |
| 114 | H34 | C34 | C35 | 119.2    |
| 115 | C30 | C35 | C34 | 121.9(5) |
| 116 | C30 | C35 | H35 | 119.1    |
| 117 | C34 | C35 | H35 | 119      |
| 118 | N3  | C36 | C10 | 127.9(3) |
| 119 | N3  | C36 | C37 | 104.8(3) |
| 120 | C10 | C36 | C37 | 127.1(3) |
| 121 | C36 | C37 | H37 | 124.5    |
| 122 | C36 | C37 | C38 | 111.0(3) |
| 123 | H37 | C37 | C38 | 124.5    |
| 124 | C37 | C38 | C39 | 107.4(3) |
| 125 | C37 | C38 | C44 | 126.8(3) |
| 126 | C39 | C38 | C44 | 125.8(3) |
| 127 | N3  | C39 | C38 | 107.5(3) |

|     |     |     |     |          |
|-----|-----|-----|-----|----------|
| 128 | N3  | C39 | C40 | 119.6(3) |
| 129 | C38 | C39 | C40 | 132.8(3) |
| 130 | C39 | C40 | H40 | 120.3    |
| 131 | C39 | C40 | C41 | 119.5(4) |
| 132 | H40 | C40 | C41 | 120.3    |
| 133 | C40 | C41 | H41 | 120.1    |
| 134 | C40 | C41 | C42 | 119.8(4) |
| 135 | H41 | C41 | C42 | 120.1    |
| 136 | C41 | C42 | H42 | 119.7    |
| 137 | C41 | C42 | C43 | 120.5(4) |
| 138 | H42 | C42 | C43 | 119.8    |
| 139 | N3  | C43 | C42 | 119.9(3) |
| 140 | N3  | C43 | H43 | 120      |
| 141 | C42 | C43 | H43 | 120.1    |
| 142 | C38 | C44 | C45 | 123.1(3) |
| 143 | C38 | C44 | C49 | 118.6(3) |
| 144 | C45 | C44 | C49 | 118.3(3) |
| 145 | C44 | C45 | H45 | 120.2    |
| 146 | C44 | C45 | C46 | 119.6(4) |
| 147 | H45 | C45 | C46 | 120.2    |
| 148 | C45 | C46 | H46 | 119.1    |
| 149 | C45 | C46 | C47 | 121.8(4) |
| 150 | H46 | C46 | C47 | 119.1    |
| 151 | C46 | C47 | H47 | 120.5    |
| 152 | C46 | C47 | C48 | 119.0(4) |
| 153 | H47 | C47 | C48 | 120.5    |
| 154 | C47 | C48 | H48 | 119.8    |
| 155 | C47 | C48 | C49 | 120.4(4) |
| 156 | H48 | C48 | C49 | 119.8    |
| 157 | C44 | C49 | C48 | 120.9(4) |
| 158 | C44 | C49 | H49 | 119.5    |
| 159 | C48 | C49 | H49 | 119.5    |
| 160 | F1  | P1  | F2  | 89.3     |
| 161 | F1  | P1  | F3  | 89.9     |
| 162 | F1  | P1  | F1  | 180      |
| 163 | F1  | P1  | F2  | 90.7     |
| 164 | F1  | P1  | F3  | 90.1     |
| 165 | F2  | P1  | F3  | 90.1     |
| 166 | F2  | P1  | F1  | 90.7     |

|     |    |    |    |          |
|-----|----|----|----|----------|
| 167 | F2 | P1 | F2 | 180      |
| 168 | F2 | P1 | F3 | 89.9     |
| 169 | F3 | P1 | F1 | 90.1     |
| 170 | F3 | P1 | F2 | 89.9     |
| 171 | F3 | P1 | F3 | 180      |
| 172 | F1 | P1 | F2 | 89.3     |
| 173 | F1 | P1 | F3 | 89.9     |
| 174 | F2 | P1 | F3 | 90.1     |
| 175 | F4 | P2 | F5 | 92.9(5)  |
| 176 | F4 | P2 | F6 | 89.2(4)  |
| 177 | F4 | P2 | F7 | 174.7(6) |
| 178 | F4 | P2 | F8 | 89.7(5)  |
| 179 | F4 | P2 | F9 | 89.7(5)  |
| 180 | F5 | P2 | F6 | 87.8(4)  |
| 181 | F5 | P2 | F7 | 82.0(5)  |
| 182 | F5 | P2 | F8 | 175.8(5) |
| 183 | F5 | P2 | F9 | 92.7(5)  |
| 184 | F6 | P2 | F7 | 91.8(5)  |
| 185 | F6 | P2 | F8 | 88.9(4)  |
| 186 | F6 | P2 | F9 | 178.8(4) |
| 187 | F7 | P2 | F8 | 95.6(5)  |
| 188 | F7 | P2 | F9 | 89.3(5)  |
| 189 | F8 | P2 | F9 | 90.6(5)  |



## PARAMAGNETIC EXPERIMENTS

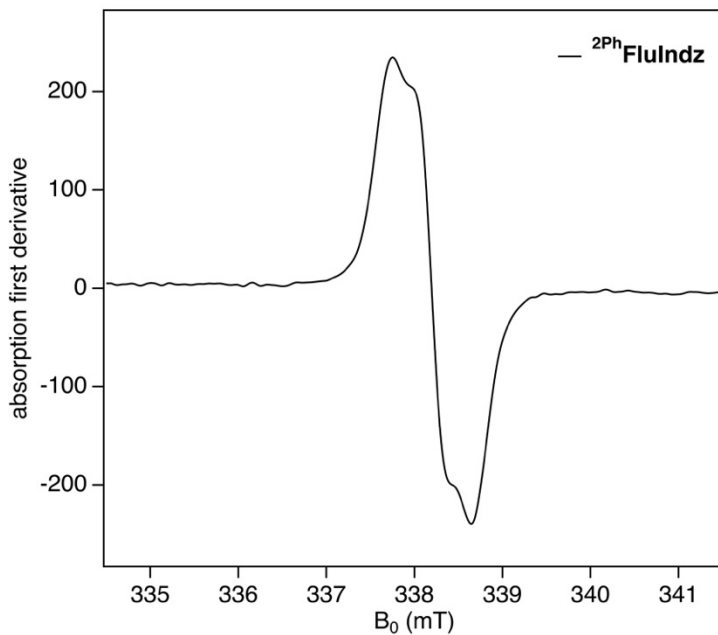

**Figure S25.** X-band (9.5 GHz) EPR spectrum of  $^{2\text{Ph}}\text{FluIndz}$  collected in DCM solution at room temperature,  $g = 1.9991$ .

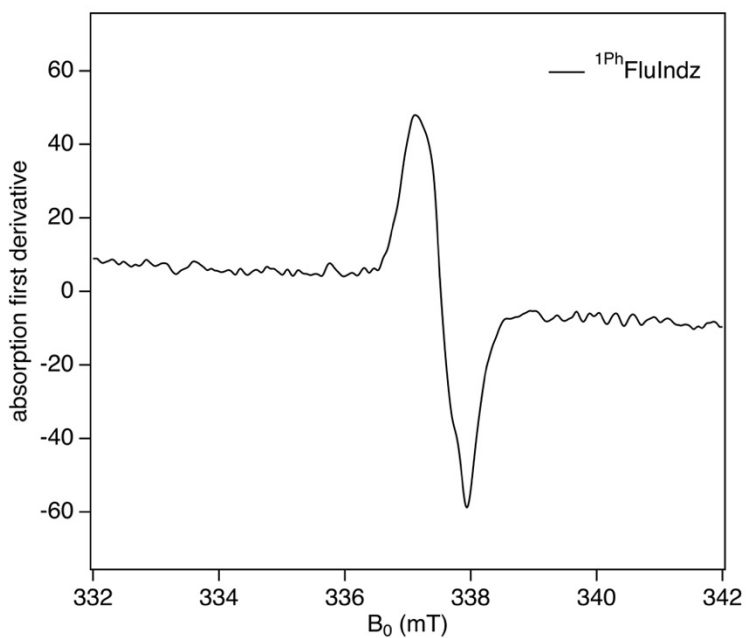

**Figure S26.** X-band (9.5 GHz) EPR spectrum of  $^{1\text{Ph}}\text{FluIndz}$  collected in DCM solution at room temperature,  $g = 2.0035$ .

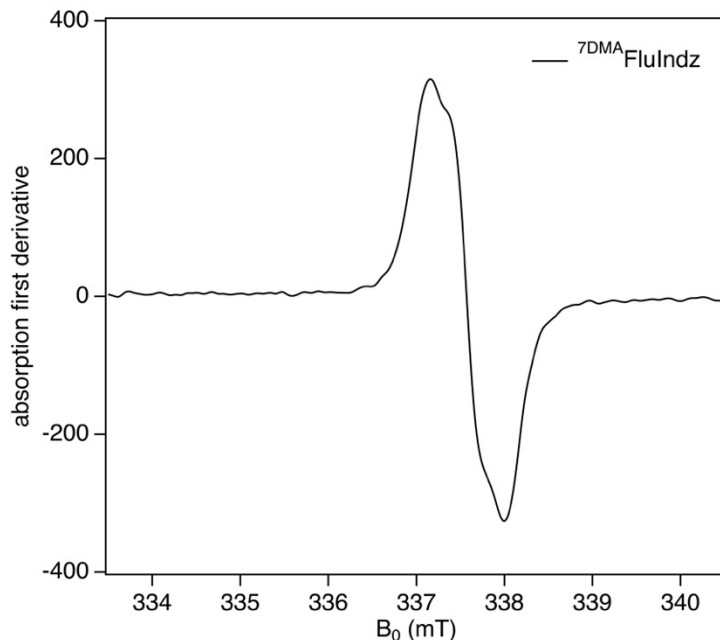

**Figure S27.** X-band (9.5 GHz) EPR spectrum of  ${}^7\text{DMAFluIndz}$  collected in DCM solution at room temperature,  $g = 2.0034$ .

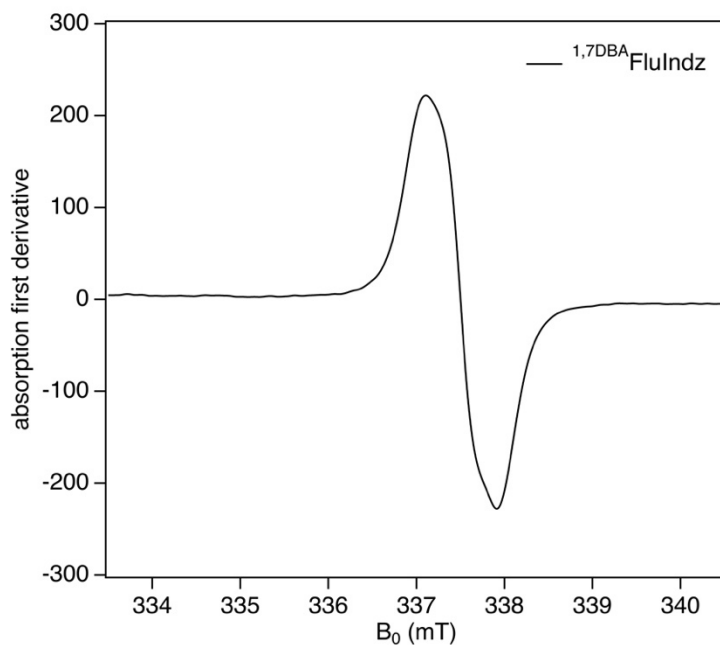

**Figure S28.** X-band (9.5 GHz) EPR spectrum of  ${}^1,7\text{DBAFluIndz}$  collected in DCM solution at room temperature,  $g = 2.0035$ .

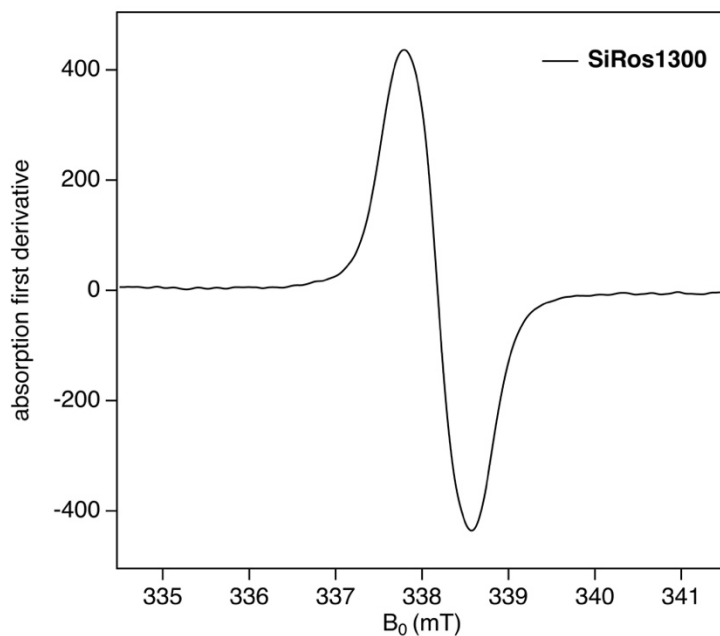

**Figure S29.** X-band (9.5 GHz) EPR spectrum of **SiRos1300** collected in DCM solution at room temperature,  $g = 2.0036$ .

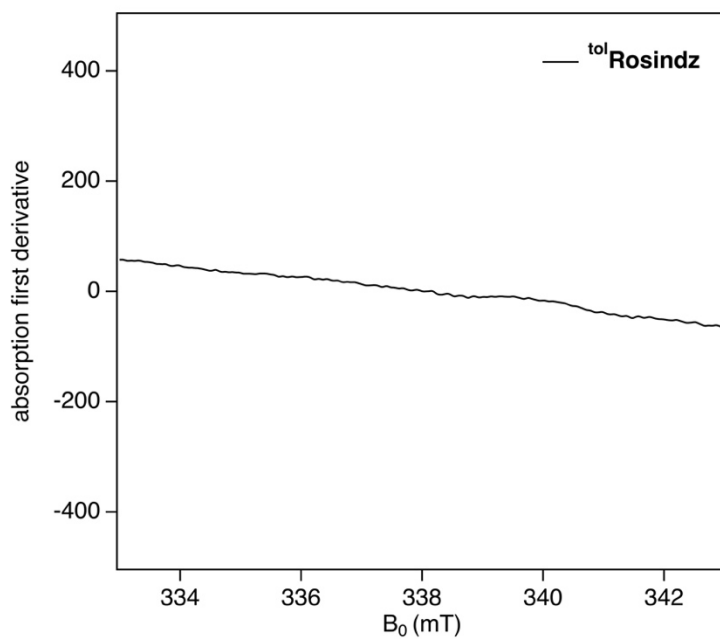

**Figure S30.** X-band (9.5 GHz) EPR spectrum of <sup>tol</sup>**RosIndz** collected in DCM solution at room temperature showing no EPR activity.

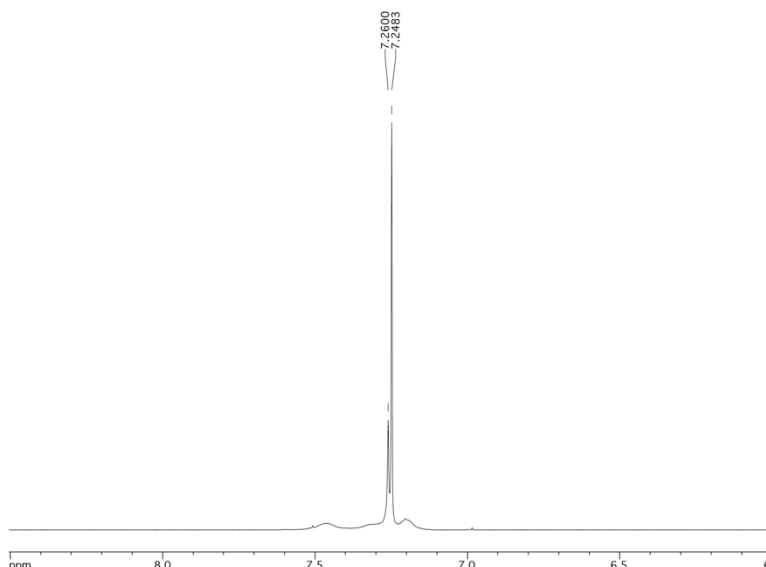

**Figure S31.** Evans method NMR spectrum for **<sup>2</sup>PhFluIndz** in CDCl<sub>3</sub> solution. Parameters: T = 298 K, spectrometer frequency = 400 MHz, concentration =  $1.71 \times 10^{-2}$  M. Paramagnetic values calculated:  $\chi_m$  (magnetic susceptibility) =  $2.053 \times 10^{-9}$  m<sup>3</sup>/mol,  $\mu_{\text{eff}}$  (effective magnetic moment) =  $0.624 \mu_B$ , n (number of unpaired electrons per molecule for spin-only  $\mu_{\text{eff}}$ ) = 0.179.

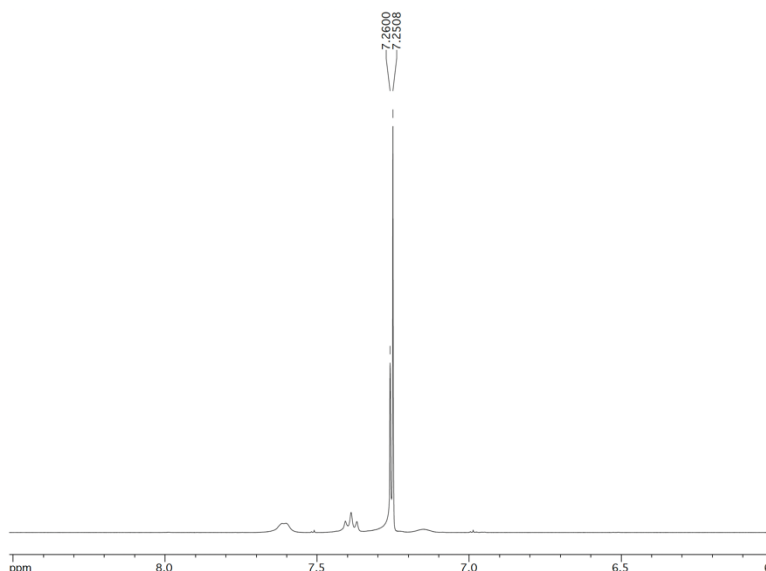

**Figure S32.** Evans method NMR spectrum for **<sup>1</sup>PhFluIndz** in CDCl<sub>3</sub> solution. Parameters: T = 298 K, spectrometer frequency = 400 MHz, concentration =  $9.94 \times 10^{-3}$  M. Paramagnetic values calculated:  $\chi_m$  (magnetic susceptibility) =  $2.777 \times 10^{-9}$  m<sup>3</sup>/mol,  $\mu_{\text{eff}}$  (effective magnetic moment) =  $0.726 \mu_B$ , n (number of unpaired electrons per molecule for spin-only  $\mu_{\text{eff}}$ ) = 0.236.

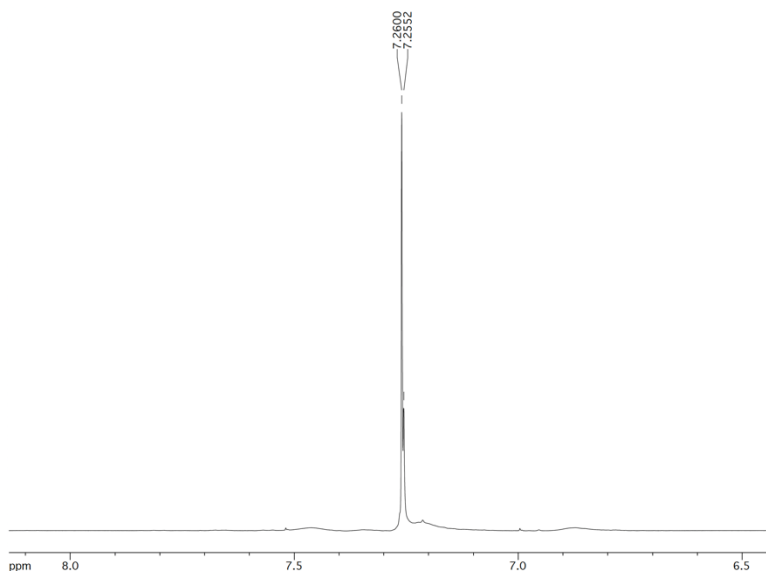

**Figure S33.** Evans method NMR spectrum for **<sup>7</sup>DMAFluIndz** in CDCl<sub>3</sub> solution. Parameters: T = 298 K, spectrometer frequency = 400 MHz, concentration =  $1.662 \times 10^{-2}$  M. Paramagnetic values calculated:  $\chi_m$  (magnetic susceptibility) =  $8.659 \times 10^{-10}$  m<sup>3</sup>/mol,  $\mu_{\text{eff}}$  (effective magnetic moment) = 0.405  $\mu_B$ , n (number of unpaired electrons per molecule for spin-only  $\mu_{\text{eff}}$ ) = 0.079.

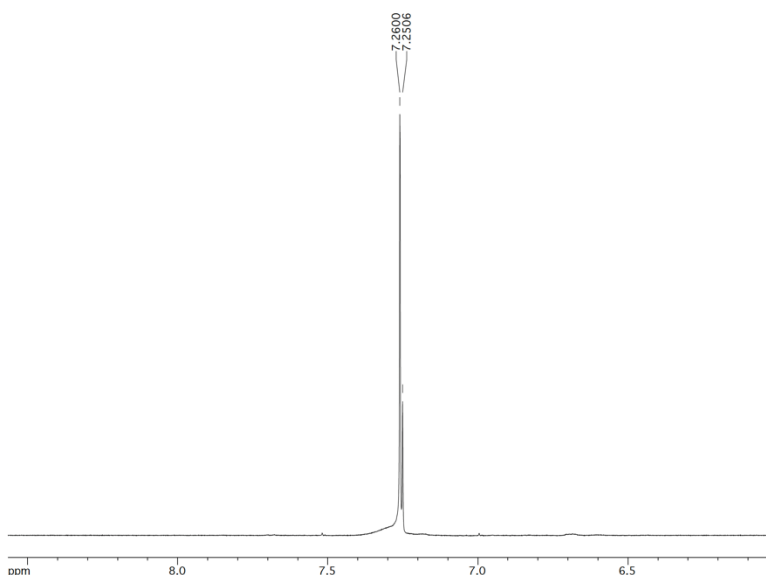

**Figure S34.** Evans method NMR spectrum for **<sup>1,7</sup>DBAFluIndz** in CDCl<sub>3</sub> solution. Parameters: T = 298 K, spectrometer frequency = 400 MHz, concentration =  $8.535 \times 10^{-3}$  M. Paramagnetic values calculated:  $\chi_m$  (magnetic susceptibility) =  $3.304 \times 10^{-9}$  m<sup>3</sup>/mol,  $\mu_{\text{eff}}$  (effective magnetic moment) = 0.792  $\mu_B$ , n (number of unpaired electrons per molecule for spin-only  $\mu_{\text{eff}}$ ) = 0.275.

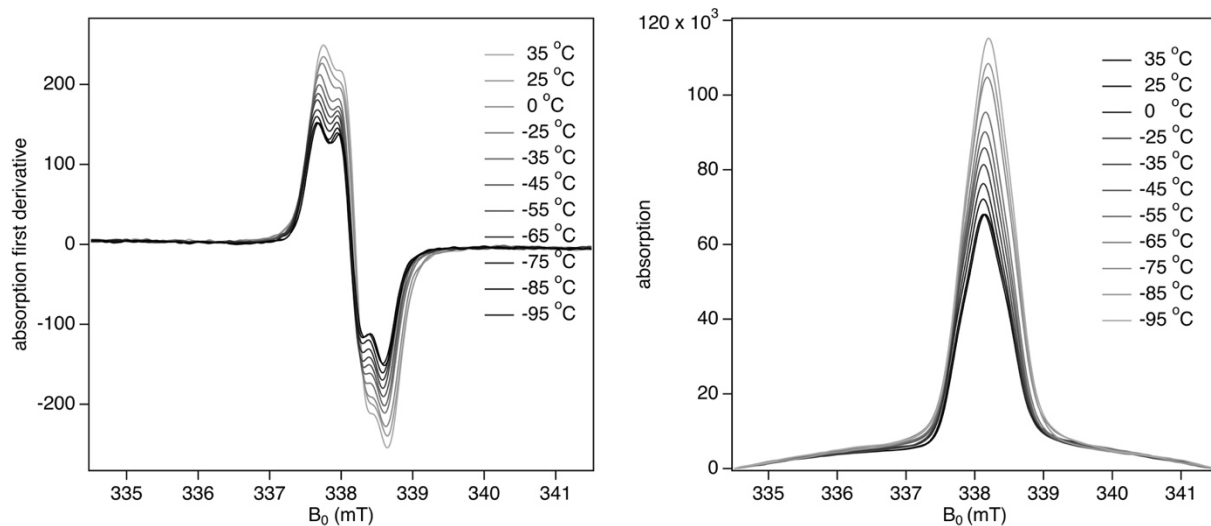

**Figure S35.** Variable temperature EPR experiment including the first derivative and integrated absorption of  $^{2\text{Ph}}\text{FluIndz}$  in DCM solution from 30 °C down to -95 °C.

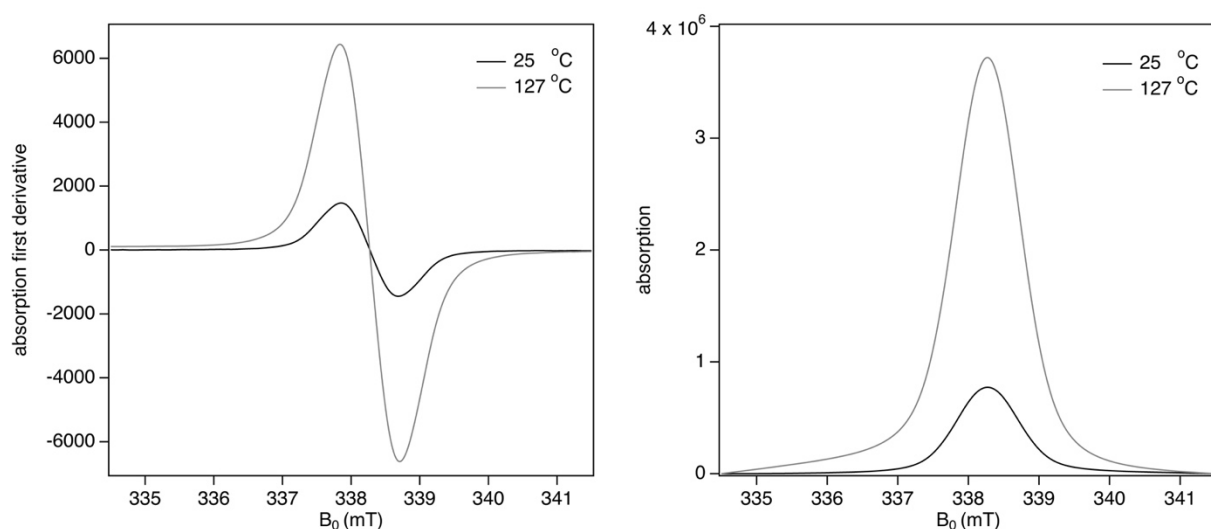

**Figure S36.** Variable temperature EPR experiment including the first derivative and integrated absorption of  $^{2\text{Ph}}\text{FluIndz}$  in PhCl solution from 25 °C ( $g = 2.0034$ ) up to 127 °C ( $g = 2.0035$ ).

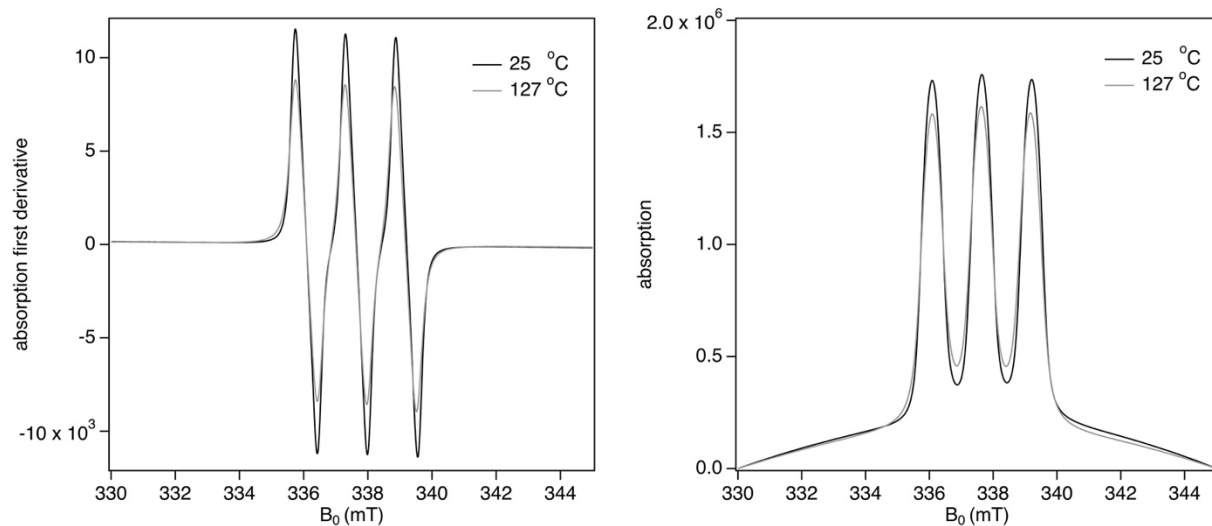

**Figure S37.** Variable temperature EPR experiment including the first derivative and integrated absorption of TEMPO in PhCl solution from 25 °C up to 127°C as an example of a temperature independent radical EPR response.

## SYNTHESIS

*3,6-bis(1-methyl-2-phenylindolizin-3-yl)-9H-fluoren-9-one (6)*: To a flame dried pressure flask under N<sub>2</sub> was added 1-methyl-2-phenylindolizine (**2**, 1.30 g, 6.27 mmol), 3,6-dibromo-9H-fluoren-9-one (**1**, 0.922 g, 2.73 mmol), Pd(OAc)<sub>2</sub> (61.4 mg, 0.273 mmol), PCy<sub>3</sub>HBF<sub>4</sub> (201 mg, 0.546 mmol), Cs<sub>2</sub>CO<sub>3</sub> (5.34 g, 16.4 mmol), and anhydrous toluene (11.0 mL). The reaction was degassed with N<sub>2</sub> for ~15 minutes before sealing and heating to 120°C for 16 hours. At this point, the reaction was observed to be complete via <sup>1</sup>H NMR monitoring. The reaction was cooled to room temperature and transferred to a separatory funnel containing water and DCM, shaken vigorously, and the organic layer collected. The aqueous layer was washed three more times with DCM. The organic layers were combined, dried over Na<sub>2</sub>SO<sub>4</sub>, and concentrated to dryness to yield the crude product. The crude was subjected to silica gel chromatography using 1:1 DCM:hexanes and the product was observed to elute as a red solution and yielded a matte red solid when concentrated (0.944 g, 1.60 mmol, 59%). <sup>1</sup>H-NMR (400 MHz; CDCl<sub>3</sub>): δ 8.13 (d, *J* = 6.8 Hz, 2H), 7.58 (d, *J* = 7.7 Hz, 2H), 7.42 (d, *J* = 9.0 Hz, 2H), 7.33-7.28 (ms, 8H), 7.24-7.22 (ms, 4H), 7.16 (dd, *J* = 7.7, 1.3 Hz, 2H), 6.75 (t, *J* = 7.6 Hz, 2H), 6.51 (t, *J* = 6.7 Hz, 2H), 2.34 (s, 6H). <sup>13</sup>C NMR were taken in both DMSO-*d*<sub>6</sub> and CDCl<sub>3</sub> due to insufficient resolution in a single solvent despite both samples being saturated and run for 16 hours. In DMSO-*d*<sub>6</sub> all of the aromatic carbon signals are observed, however, the ketone carbon signal is not observed. In CDCl<sub>3</sub> the ketone carbon signal is observed, but not all of the aromatic carbon signals are observed. <sup>13</sup>C NMR (101 MHz; DMSO-*d*<sub>6</sub>): δ 143.9, 137.5, 134.7, 131.7, 130.9, 130.8, 130.3, 128.7, 128.2, 126.6, 124.2, 122.4, 121.9, 120.1, 117.7, 117.5, 111.4, 107.5, 9.0. <sup>13</sup>C NMR (101 MHz; CDCl<sub>3</sub>): δ 192.4, 144.5, 138.2, 135.1, 132.9, 130.7, 130.6, 130.6, 128.4, 126.9, 126.9, 124.8, 121.3, 118.1, 9.4. HRMS *m/z* calculated for C<sub>43</sub>H<sub>30</sub>N<sub>2</sub>O [M]<sup>+</sup> 590.2358, found 590.2330. IR (cm<sup>-1</sup>) 3107, 3054, 2921, 2855, 1701, 1606, 1524, 1495, 1446, 1422, 1394, 1350, 1323, 1295, 1264, 1248, 1234, 1195, 1154, 1124, 1105, 1065, 1032, 1014, 1003.

*3,6-bis(1-phenylindolizin-3-yl)-9H-fluoren-9-one (7)*: To a flame dried pressure flask under N<sub>2</sub> was added 1-phenylindolizine (**3**, 0.72 g, 3.73 mmol), 3,6-dibromo-9H-fluoren-9-one (**1**, 0.504 g, 1.49 mmol), Pd(OAc)<sub>2</sub> (33.3 mg, 0.149 mmol), PCy<sub>3</sub>HBF<sub>4</sub> (110 mg, 0.298 mmol), Cs<sub>2</sub>CO<sub>3</sub> (2.91 g, 8.94 mmol), and anhydrous toluene (11.9 mL). The reaction was degassed with N<sub>2</sub> for ~15 minutes before sealing and heating to 120°C for 16 hours. At this point, the reaction was observed to be complete via <sup>1</sup>H NMR monitoring. The reaction was cooled to room temperature and transferred to a separatory funnel containing water and DCM, shaken vigorously, and the organic layer collected. The aqueous layer was washed three more times with DCM. The organic layers were combined, dried over Na<sub>2</sub>SO<sub>4</sub>, and concentrated to dryness to yield the crude. The crude was subjected to silica gel chromatography using 70:30 DCM:hexanes and the product was observed to elute as a red solution and yielded a red solid when concentrated (0.148 g, 0.263 mmol, 18%). <sup>1</sup>H NMR (400 MHz, CDCl<sub>3</sub>) δ 8.43 (d, *J* = 7.2 Hz, 2H), 7.84 – 7.80 (m, 6H), 7.63 (m, 6H), 7.46 (t, *J* = 7.7 Hz, 4H), 7.29 (t, *J* = 7.4 Hz, 2H), 7.21 (s, 2H), 6.84 (t, *J* = 6.6 Hz, 2H), 6.64 (t, *J* = 6.8 Hz, 2H) ppm. <sup>13</sup>C NMR (101 MHz, CDCl<sub>3</sub>) δ 192.3, 145.0, 138.5, 135.8, 133.1, 131.9, 129.0, 127.8, 127.7, 126.0, 125.2, 125.1, 123.2, 119.4, 119.3, 119.0, 116.6, 115.3, 112.2 ppm. HRMS *m/z* calculated for C<sub>43</sub>H<sub>30</sub>N<sub>2</sub>O [M + H]<sup>+</sup> 563.2123, found 563.2097. IR (cm<sup>-1</sup>) 3054, 3028, 2953, 2925, 2854, 2360, 2340, 1700, 1599, 1545, 1511, 1489, 1469, 1441, 1418, 1398, 1365, 1341, 1326, 1299, 1253, 1208, 1139, 1110, 1072, 1031, 1014.



*3,6-bis(7-(4-(dimethylamino)phenyl)-1-(2-ethylhexyl)-2-phenylindolizin-3-yl)-9H-fluoren-9-one* (**8**): To a flame dried pressure flask under N<sub>2</sub> was added 4-(1-(2-ethylhexyl)-2-phenylindolizin-7-yl)-*N,N*-dimethylaniline (**4**, 0.500 g, 1.18 mmol), 3,6-dibromo-9*H*-fluoren-9-one (**1**, 0.181 g, 0.536 mmol), Pd(OAc)<sub>2</sub> (12.0 mg, 0.0536 mmol), PCy<sub>3</sub>HBF<sub>4</sub> (39.4 mg, 0.107 mmol), Cs<sub>2</sub>CO<sub>3</sub> (1.05 g, 3.22 mmol), and anhydrous toluene (4.3 mL). The reaction was degassed with N<sub>2</sub> for ~15 minutes before sealing and heating to 130°C for 60 hours. At this point, the reaction was observed to be complete via <sup>1</sup>H NMR monitoring. The reaction was cooled to room temperature and transferred to a separatory funnel containing water and Et<sub>2</sub>O, shaken vigorously, and the organic layer collected. The aqueous layer was washed three more times with Et<sub>2</sub>O. All the organic layers were combined, dried over Na<sub>2</sub>SO<sub>4</sub>, and concentrated to dryness to yield the crude material. The crude was subjected to silica gel chromatography using 100% hexanes and increasing to 80% DCM/hexanes where the product was observed to elute as a purple solution and yielded a purple solid when concentrated (0.181 g, 0.177 mmol, 33%). <sup>1</sup>H-NMR (400 MHz; C<sub>6</sub>D<sub>6</sub>): δ 7.96 (d, *J* = 7.4 Hz, 2H), 7.89 (s, 2H), 7.73 (d, *J* = 8.7 Hz, 4H), 7.49 (d, *J* = 7.7 Hz, 2H), 7.42 (d, *J* = 7.2 Hz, 4H), 7.26 (s, 2H), 7.21 (t, *J* = 7.5 Hz, 4H), 7.12 (t, *J* = 7.5 Hz, 2H), 6.93 (d, *J* = 7.8 Hz, 2H), 6.78 (d, *J* = 7.4 Hz, 2H), 6.73 (d, *J* = 8.8 Hz, 4H), 2.95 (m, 4H), 2.57 (s, 12H), 1.65 (m, 2H), 1.35 (ms, 8H), 1.19 - 1.14 (ms, 8H), 0.85 - 0.79 (ms, 14H). <sup>13</sup>C-NMR (101 MHz; C<sub>6</sub>D<sub>6</sub>): δ 150.4, 144.8, 137.9, 136.6, 133.2, 133.2, 131.2, 131.0, 130.9, 130.8, 128.6, 127.4, 127.3, 126.9, 124.7, 123.0, 121.3, 121.2, 113.6, 113.4, 113.4, 111.1, 41.6, 40.2, 33.3, 29.2, 28.7, 26.3, 23.5, 14.4, 11.2. HRMS *m/z* calculated for C<sub>73</sub>H<sub>77</sub>N<sub>4</sub>O [M]<sup>+</sup> 1025.6097, found 1025.6110. IR (cm<sup>-1</sup>) 3055, 3028, 2954, 2924, 2869, 2854, 2800, 1702, 1607, 1523, 1496, 1480, 1465, 1444, 1422, 1379, 1356, 1297, 1233, 1198, 1167, 1127, 1107, 1059, 1029, 1001.

*(4-bromopyridin-2-yl)(4-(dibutylamino)phenyl)methanol* (**12**): To a flame dried round bottom flask under N<sub>2</sub> was added THF (50 mL) and magnesium turnings (0.62 g, 25.3 mmol) followed by a flake of iodine. 4-bromo-*N,N*-dibutylaniline (5.60 g, 19.7 mmol) was then added to the solution and the reaction flask was adapted to a flame dried reflux condenser under N<sub>2</sub>. The reaction was heated to reflux overnight, approximately 16 hours. The next morning the reaction was cooled to room temperature. To a separate flame dried round bottom flask under N<sub>2</sub> was added 4-bromopicolinaldehyde (**10**, 2.62 g, 14.1 mmol) and THF (35 mL). The Grignard reaction was added to the aldehyde solution at 0 °C via canula over ~10 minutes. The reaction was allowed to stir at 0 °C for 1 hour and was allowed to come to room temperature over an additional hour. At this time the reaction was quenched with water and extracted with sat. NH<sub>4</sub>Cl<sub>(aq)</sub> and Et<sub>2</sub>O three times. The Et<sub>2</sub>O layer was dried with Na<sub>2</sub>SO<sub>4</sub> and concentrated to yield a dark brown oil as the crude product. The oil was subjected to silica gel chromatography beginning with 100% hexanes and gradually increasing to 20% EtOAc/hexanes to yield the pure product as a yellow oil (3.22 g, 8.23 mmol, 58%). <sup>1</sup>H-NMR (300 MHz; C<sub>6</sub>D<sub>6</sub>): δ 7.86 (d, *J* = 5.3 Hz, 1H), 7.35 (d, *J* = 1.9 Hz, 1H), 7.29 (d, *J* = 8.6 Hz, 2H), 6.69 (dd, *J* = 5.3, 1.9 Hz, 1H), 6.59 (d, *J* = 8.9 Hz, 2H), 5.67 (d, *J* = 4.2 Hz, 1H), 4.52 (d, *J* = 4.3 Hz, 1H), 3.00 (t, *J* = 7.6 Hz, 4H), 1.37 (p, *J* = 7.6 Hz, 4H), 1.12 (sext, *J* = 7.4 Hz, 4H), 0.81 (t, *J* = 7.3 Hz, 6H). <sup>13</sup>C NMR (75 MHz; C<sub>6</sub>D<sub>6</sub>): δ 165.2, 148.9, 148.3, 133.4, 130.4, 128.6, 125.3, 124.6, 112.3, 75.3, 51.0, 29.7, 20.6, 14.2. HRMS *m/z* calculated for C<sub>20</sub>H<sub>28</sub>BrN<sub>2</sub>O [M + H]<sup>+</sup> 391.1380, found 391.1379. IR (cm<sup>-1</sup>) 3310 br, 3095, 3074, 3047, 2955, 2929, 2870, 1611, 1570, 1553, 1518, 1461, 1396, 1367, 1285, 1252, 1217, 1181, 1148, 1101, 1088, 1046.

*4-((4-bromopyridin-2-yl)methyl)-N,N-dibutylaniline (13)*: To a flame dried round bottom flask under N<sub>2</sub> was added **12** (3.22 g, 8.23 mmol), AcOH (35 mL), and HI<sub>(aq)</sub> (2.7 mL, 57% w/w, 20.6 mmol) and the reaction degassed with N<sub>2</sub> for 10 minutes. At this time the reaction was heated to reflux for 1.5 hours upon which the starting material was observed to be consumed via <sup>1</sup>H NMR monitoring. The reaction was cooled to room temperature and quenched with 100 mL of saturated Na<sub>2</sub>SO<sub>3(aq)</sub> and allowed to stir for 10 minutes. Sufficient Na<sub>2</sub>CO<sub>3</sub> was then added to neutralize the reaction, which was extracted with DCM three times, dried over Na<sub>2</sub>SO<sub>4</sub>, and concentrated to yield a dark brown oil. The reaction was purified via silica gel chromatography using 100% hexanes and gradually increasing to 20% Et<sub>2</sub>O/hexanes to elute the product as a yellow oil. (2.08g, 5.55 mmol, 67%). Note that the product coeluted with an inseparable impurity and was isolated and used in the subsequent reaction as an impure material. The calculated yield herein is estimated from <sup>1</sup>H-NMR integrations. <sup>1</sup>H-NMR (300 MHz; C<sub>6</sub>D<sub>6</sub>): δ 7.92 (d, *J* = 5.2 Hz, 1H), 7.41 (d, *J* = 1.4 Hz, 1H), 7.14 (d, *J* = 8.8 Hz, 2H), 6.96 (dd, *J* = 5.2, 1.6 Hz, 1H), 6.60 (d, *J* = 8.8 Hz, 2H), 3.96 (s, 2H), 3.02 (t, *J* = 7.5 Hz, 4H), 1.40 (p, *J* = 7.6 Hz, 4H), 1.14 (sext, *J* = 7.4 Hz, 4H), 0.81 (t, *J* = 7.3 Hz, 6H). <sup>13</sup>C NMR (75 MHz; C<sub>6</sub>D<sub>6</sub>): δ 163.9, 149.9, 147.4, 132.2, 130.3, 126.2, 124.3, 112.8, 105.8, 51.1, 43.8, 29.8, 20.6, 14.2. HRMS *m/z* calculated for C<sub>20</sub>H<sub>28</sub>BrN<sub>2</sub> [M + H]<sup>+</sup> 375.1431, found 375.1429. IR (cm<sup>-1</sup>) 3092, 3067, 3037, 3010, 2955, 2929, 2870, 1614, 1591, 1561, 1543, 1518, 1462, 1430, 1376, 1368, 1285, 1254, 1216, 1188, 1148, 1109, 1083, 1008.

*N,N-dibutyl-4-(2-(4-(dibutylamino)benzyl)pyridin-4-yl)aniline (15)*: To a round bottom flask was added **13** (1.47 g, 3.91 mmol), *N,N*-dibutyl-4-(4,4,5,5-tetramethyl-1,3,2-dioxaborolan-2-yl)aniline (**14**, 2.76 g, 8.33 mmol), Pd(PPh<sub>3</sub>)<sub>4</sub> (0.411 g, 0.360 mmol), K<sub>2</sub>CO<sub>3</sub> (2.95 g, 21.3 mmol), 1,4-dioxane (23 mL), ethanol (10 mL), and water (3 mL). The solution was degassed with N<sub>2</sub> for 10 minutes, then set to reflux overnight until the starting materials were consumed as visualized *via* TLC and <sup>1</sup>H-NMR monitoring. The flask was cooled to room temperature and the reaction mixture was quenched with NH<sub>4</sub>Cl<sub>(aq)</sub> and extracted with DCM three times. The organic layers were combined and dried over Na<sub>2</sub>SO<sub>4</sub> and concentrated. The resulting crude oil was purified via silica gel chromatography using 100% hexanes and gradually increasing to 20% EtOAc/hexanes to elute the product as a red oil. (**15**, 2.65 g, 5.31 mmol, 96%). Note that the product coeluted with an inseparable impurity and was isolated and used in the subsequent reaction as an impure material. The calculated yield herein is estimated from <sup>1</sup>H-NMR integrations. A small amount of pure material was isolated and used for characterization shown herein. <sup>1</sup>H-NMR (300 MHz, CDCl<sub>3</sub>) δ 8.47 (d, *J* = 5.3 Hz, 1H), 7.48 (d, *J* = 9.0 Hz, 2H), 7.30 – 7.28 (m, 1H), 7.26 – 7.23 (m, 1H), 7.13 (d, *J* = 8.7 Hz, 2H), 6.67 (d, *J* = 9.0 Hz, 2H), 6.59 (d, *J* = 8.8 Hz, 2H), 4.06 (s, 2H), 3.35 – 3.26 (m, 4H), 3.26 – 3.14 (m, 4H), 1.63 – 1.46 (m, 8H), 1.46 – 1.19 (m, 8H), 1.09 – 0.82 (m, 12H). <sup>13</sup>C-NMR (75 MHz, CDCl<sub>3</sub>) δ 162.2, 149.4, 148.7, 146.8, 129.8, 127.8, 126.3, 124.3, 119.5, 117.7, 112.1, 111.7, 50.9, 50.8, 43.9, 29.5, 29.4, 20.4, 20.4, 14.1, 14.0. HRMS (ESI) *m/z* calculated for C<sub>34</sub>H<sub>50</sub>N<sub>3</sub> [M + H]<sup>+</sup> 500.4005, found: 500.4009. IR (cm<sup>-1</sup>) 2955, 2929, 2870, 1611, 1594.

*4,4'-(2-phenylindolizine-1,7-diyl)bis(N,N-dibutylaniline) (5)*: To a round bottom flask was added **15** (2.65 g, 5.31 mmol), 2-bromoacetophenone (**16**, 1.32 g, 6.63 mmol), and acetone (27 mL). The reaction was then set to reflux for 48 hours until the starting materials were consumed as visualized *via* TLC and <sup>1</sup>H-NMR monitoring, at which point the flask was cooled to room temperature and the acetone was removed *via* constant flow of air. To the flask was then added NaHCO<sub>3</sub> (2.23 g, 26.5 mmol), 1,4-dioxane (14 mL), ethanol (28 mL), and water (8 mL). The reaction mixture was degassed with N<sub>2</sub> for 10 minutes and set to reflux overnight until the intermediate was consumed

by TLC and <sup>1</sup>H-NMR monitoring. The flask was cooled to room temperature, water was added, and the reaction extracted with DCM three times. The organic layers were combined and dried over Na<sub>2</sub>SO<sub>4</sub> and concentrated. The resulting crude oil was purified via neutral alumina chromatography using 100% hexanes and gradually increasing to 20% DCM/hexanes to elute the product as a brown oil (2.36 g, 3.94 mmol, 74%). <sup>1</sup>H-NMR (400 MHz, CD<sub>3</sub>CN) δ 8.01 (d, *J* = 7.2 Hz, 1H), 7.48 (s, 1H), 7.46 (s, 1H), 7.42 (d, *J* = 8.6 Hz, 2H), 7.35–7.17 (m, 5H), 7.08 (d, *J* = 8.4 Hz, 2H), 6.81 (d, *J* = 6.8 Hz, 1H), 6.68 (d, *J* = 8.7 Hz, 2H), 6.64 (d, *J* = 8.6 Hz, 2H), 3.34–3.21 (m, 8H), 1.60–1.47 (m, 8H), 1.40–1.25 (m, 8H), 0.93 (t, *J* = 7.3 Hz, 12H). <sup>13</sup>C-NMR (101 MHz, CD<sub>3</sub>CN) δ 148.6, 147.5, 136.9, 132.2, 131.9, 131.0, 129.7, 129.1, 129.0, 127.5, 127.1, 126.5, 126.3, 122.6, 113.3, 112.9, 112.7, 112.5, 111.7, 110.9, 51.3, 51.2, 30.2, 30.1, 20.9, 20.9, 14.3, 14.2. HRMS (ESI) *m/z* calculated for C<sub>42</sub>H<sub>54</sub>N<sub>3</sub> [M + H]<sup>+</sup> 600.4318, found: 600.4315. IR (cm<sup>-1</sup>) 3043, 2954, 2928, 2869, 1608.

*3,6-bis(1,7-bis(4-(dibutylamino)phenyl)-2-phenylindolizin-3-yl)-9H-fluoren-9-one (9)*: To a flame dried pressure flask under N<sub>2</sub> was added 4,4'-(2-phenylindolizine-1,7-diyl)bis(*N,N*-dibutylaniline) (**5**, 0.75 g, 1.25 mmol), 3,6-dibromo-9*H*-fluoren-9-one (**1**, 0.192 g, 0.568 mmol), Pd(OAc)<sub>2</sub> (12.7 mg, 0.057 mmol), PCy<sub>3</sub>HBF<sub>4</sub> (41.8 mg, 0.114 mmol), Cs<sub>2</sub>CO<sub>3</sub> (1.11 g, 3.41 mmol), and anhydrous toluene (4.5 mL). The reaction was degassed with N<sub>2</sub> for ~15 minutes before sealing and heating to 130°C for 22 hours. At this point, the reaction was observed to be complete via <sup>1</sup>H-NMR monitoring due to complete consumption of the dibromo starting material. The reaction was cooled to room temperature and transferred to a separatory funnel containing water and DCM, shaken vigorously, and the organic layer collected. The aqueous layer was washed three more times with DCM. All of the organic layers were combined, dried over Na<sub>2</sub>SO<sub>4</sub>, and concentrated to dryness to yield the crude material. The crude was subjected to silica gel chromatography using 100% hexanes and increasing to 20% EtOAc/hexanes where the product was observed to elute as a purple-colored solution and yielded a green solid when concentrated (171 mg, 0.124 mmol, 22%). <sup>1</sup>H-NMR (300 MHz; C<sub>6</sub>D<sub>6</sub>): δ 8.15 (d, *J* = 1.1 Hz, 2H), 7.94 (d, *J* = 7.3 Hz, 2H), 7.57-7.50 (ms, 10H), 7.44 (dd, *J* = 8.0, 1.3 Hz, 4H), 7.27 (d, *J* = 0.6 Hz, 2H), 7.09-7.01 (ms, 6H), 6.96 (dd, *J* = 7.7, 1.3 Hz, 2H), 6.86 (dd, *J* = 7.5, 1.9 Hz, 2H), 6.70 (d, *J* = 8.9 Hz, 4H), 6.65 (d, *J* = 8.9 Hz, 4H), 3.07 (q, *J* = 7.7 Hz, 16H), 1.52-1.40 (m, 16H), 1.27-1.08 (m, 16H), 0.87 (t, *J* = 7.3 Hz, 12H), 0.80 (t, *J* = 7.3 Hz, 12H). <sup>13</sup>C-NMR (75 MHz; C<sub>6</sub>D<sub>6</sub>): δ 191.7, 147.9, 147.0, 144.9, 138.2, 136.0, 133.5, 132.8, 131.8, 131.8, 131.7, 131.6, 128.9, 128.9, 127.4, 127.18, 127.03, 126.7, 124.8, 122.8, 122.5, 121.9, 121.5, 116.0, 113.7, 112.9, 112.5, 111.2, 51.1, 29.9, 29.9, 20.7, 14.2, 14.2. HRMS *m/z* calculated for C<sub>97</sub>H<sub>110</sub>N<sub>6</sub>O [M]<sup>+</sup> 1375.8770, found 1375.8759. IR (cm<sup>-1</sup>) 3079, 3051, 2955, 2929, 2870, 1704, 1608, 1524, 1512, 1491, 1465, 1423, 1396, 1367, 1293, 1250, 1220, 1198, 1150, 1111, 1051.

*9-(2,6-dimethylphenyl)-3,6-bis(1-methyl-2-phenylindolizin-3-yl)-9H-fluoren-9-ylidene hexafluorophosphate (2<sup>Ph</sup>FluIndz)*: To a flame dried round bottom flask under N<sub>2</sub> was added THF (3.6 mL) followed by **6** (0.085 g, 0.144 mmol). 2,6-dimethylphenylmagnesium bromide (0.72 mL, 1.0 M in THF, 0.72 mmol) was then added dropwise and the reaction allowed to stir at room temperature overnight. The next morning the reaction was observed to be complete via <sup>1</sup>H-NMR monitoring and was quenched with H<sub>2</sub>O. The reaction was then extracted with DCM three times and the organic layer passed through a thin pad of silica gel, rinsing with DCM, and concentrated to yield the intermediate as an off red solid. The solid was added to a flame dried round bottom flask under N<sub>2</sub> followed by dichloroethane (5.0 mL) and POCl<sub>3</sub> (0.04 mL, 0.432 mmol) and heated

to reflux for 1 hour. At this point the reaction was observed to be complete as visualized *via* TLC monitoring for consumption of the intermediate. The reaction was added dropwise to ~100 mL of Et<sub>2</sub>O to precipitate the crude product. The crude product was filtered off, rinsed with Et<sub>2</sub>O, and redissolved into a clean round bottom flask using DCM. Then 5 mL of a saturated KPF<sub>6</sub> solution in MeCN was added dropwise to swap the existing anion for a PF<sub>6</sub><sup>-</sup> anion. The reaction was allowed to stir until the salt swap was complete by TLC (all the product moving off the baseline in 10% MeCN/DCM), approximately 1 hour. At this point, the solids were filtered off, rinsed with DCM, and the filtrate concentrated to yield the crude product. The crude was subjected to silica gel chromatography beginning with 100% DCM and gradually increasing to 10% MeCN/DCM to elute the product as a dark purple colored solution and a sparkly dark purple solid when concentrated (0.075 g, 0.091 mmol, 63%). <sup>1</sup>H- and <sup>13</sup>C-NMRs were not obtained due to insufficient resolution (broad peaks, no discernable aromatic signals) in a multitude of NMR solvents attempted, likely due to the presence of thermally accessible diradicals. Anal. Calcd for 8:1 dye (C<sub>51</sub>H<sub>39</sub>N<sub>2</sub>PF<sub>6</sub>):CH<sub>2</sub>Cl<sub>2</sub>: C, 73.50; H, 4.74; N, 3.35. Found: C, 73.49; H, 4.83; N, 3.37. Residual DCM is included in the formula herein as it was observed to be present in a <sup>1</sup>H-NMR of the sample, despite being placed on vacuum overnight. HRMS *m/z* calculated for C<sub>51</sub>H<sub>39</sub>N<sub>2</sub> [M – PF<sub>6</sub>]<sup>+</sup> 679.3108, found 679.3100. IR (cm<sup>-1</sup>) 3058, 2921, 2857, 1617, 1588, 1545, 1521, 1505, 1471, 1433, 1388, 1369, 1320, 1282, 1225, 1208, 1153, 1134, 1096, 1036, 1001.

*9-(2,6-dimethylphenyl)-3,6-bis(1-phenylindolin-3-yl)-9H-fluoren-9-ylum hexafluorophosphate (1<sup>Ph</sup>FluIndz)*: To a flame dried round bottom flask under N<sub>2</sub> was added THF (6.6 mL) followed by **7** (0.148 g, 0.264 mmol). 2,6-dimethylphenylmagnesium bromide (0.79 mL, 1.0 M in THF, 0.79 mmol) was then added dropwise and the reaction allowed to stir at room temperature overnight. The next morning the reaction was observed to be complete as visualized *via* <sup>1</sup>H-NMR monitoring and was quenched with H<sub>2</sub>O. The reaction was then extracted with DCM three times and the organic layer passed through a thin pad of silica gel, rinsing with DCM, and concentrated to yield the intermediate as an off red solid. The solid was added to a flame dried round bottom flask under N<sub>2</sub> followed by dichloroethane (13.2 mL) and POCl<sub>3</sub> (0.074 mL, 0.792 mmol) and heated to reflux for 2 hours. At this point the reaction was observed to be complete *via* TLC monitoring for consumption of the intermediate. The reaction was added dropwise to ~100 mL of Et<sub>2</sub>O to precipitate the crude product. The crude product was filtered off, rinsed with Et<sub>2</sub>O, and redissolved into a clean round bottom flask using DCM. Then 5 mL of a saturated KPF<sub>6</sub> solution in MeCN was added dropwise to swap the existing anion for a PF<sub>6</sub><sup>-</sup> anion. The reaction was allowed to stir until the salt swap was complete by TLC (all the product moving off the baseline in 10% MeCN/DCM), approximately 1 hour. At this point, the solids were filtered off, rinsed with DCM, and the filtrate concentrated to yield the crude product. The crude was subjected to silica gel chromatography beginning with 100% DCM and gradually increasing to 10% MeCN/DCM to elute the product as a dark brown colored solution and a sparkly dark brown solid when concentrated (0.069 g, 0.087 mmol, 32%). <sup>1</sup>H- and <sup>13</sup>C-NMRs were not obtained due to insufficient resolution (broad peaks, no discernable aromatic signals) in a multitude of NMR solvents attempted, likely due to the presence of thermally accessible diradicals. Anal. Calcd for C<sub>49</sub>H<sub>35</sub>N<sub>2</sub>PF<sub>6</sub>: C, 73.86; H, 4.43; N, 3.52. Found: C, 73.60; H, 4.45; N, 3.49. HRMS *m/z* calculated for C<sub>49</sub>H<sub>35</sub>N<sub>2</sub> [M – PF<sub>6</sub>]<sup>+</sup> 651.2795, found 651.2805. IR (cm<sup>-1</sup>) 3103, 3059, 2920, 2855, 1615, 1588, 1506, 1470, 1432, 1355, 1283, 1238, 1209, 1130, 1105, 1027, 1011.

*3,6-bis(7-(4-(dimethylamino)phenyl)-1-(2-ethylhexyl)-2-phenylindolizin-3-yl)-9-(2,6-dimethylphenyl)-9H-fluoren-9-ylidium hexafluorophosphate* (<sup>7DMA</sup>**FluIndz**): To a flame dried round bottom flask under N<sub>2</sub> was added THF (4.4 mL) followed by **8** (0.181 g, 0.177 mmol). 2,6-dimethylphenylmagnesium bromide (0.53 mL, 1.0 M in THF, 0.53 mmol) was then added dropwise and the reaction allowed to stir at room temperature overnight. The next morning the reaction was observed to be complete via <sup>1</sup>H-NMR monitoring and was quenched with H<sub>2</sub>O. The reaction was then extracted with DCM three times and the organic layer passed through a thin pad of silica, rinsing with DCM, and concentrated to yield the intermediate as an off yellow solid. The solid was added to a flame dried round bottom flask under N<sub>2</sub> followed by dichloroethane (8.9 mL) and POCl<sub>3</sub> (0.049 mL, 0.53 mmol) and heated to reflux for 2 hours. At this point the reaction was observed to be complete *via* TLC monitoring for consumption of the intermediate. The reaction was added dropwise to ~100 mL of Et<sub>2</sub>O to precipitate the crude product. The crude product was filtered off, rinsed with Et<sub>2</sub>O, and redissolved into a clean round bottom flask using DCM. Then 5 mL of a saturated KPF<sub>6</sub> solution in MeCN was added dropwise to swap the existing anion for a PF<sub>6</sub><sup>-</sup> anion. The reaction was allowed to stir until the salt swap was complete by TLC (all the product moving off the baseline in 10% MeCN/DCM), approximately 1 hour. At this point, the solids were filtered off, rinsed with DCM, and the filtrate concentrated to yield the crude product. The crude was subjected to silica gel chromatography beginning with 100% DCM and gradually increasing to 10% MeCN/DCM to elute the product as a dark brown colored solution and a sparkly dark brown solid when concentrated (0.127 g, 0.101 mmol, 57%). <sup>1</sup>H- and <sup>13</sup>C-NMRs were not obtained due to insufficient resolution (broad peaks, no discernable aromatic signals) in a multitude of NMR solvents attempted, likely due to the presence of thermally accessible diradicals. Anal. Calcd for C<sub>81</sub>H<sub>85</sub>N<sub>4</sub>PF<sub>6</sub>: C, 77.24; H, 6.80; N, 4.45. Found: C, 77.15; H, 6.85; N, 4.36. HRMS *m/z* calculated for C<sub>81</sub>H<sub>85</sub>N<sub>4</sub> [M – PF<sub>6</sub><sup>-</sup>]<sup>+</sup> 1113.6769, found 1113.6782. IR (cm<sup>-1</sup>) 3174, 3059, 2954, 2924, 2856, 2808, 1630, 1579, 1537, 1475, 1433, 1414, 1372, 1332, 1293, 1262, 1227, 1198, 1171, 1136, 1081, 1041, 1024, 1006.

*3,6-bis(1,7-bis(4-(dibutylamino)phenyl)-2-phenylindolizin-3-yl)-9-(2,6-dimethylphenyl)-9H-fluoren-9-ylidium hexafluorophosphate* (<sup>1,7DBA</sup>**FluIndz**): To a flame dried round bottom flask under N<sub>2</sub> was added THF (3.1 mL) followed by **9** (0.171 g, 0.124 mmol). 2,6-dimethylphenylmagnesium bromide (0.37 mL, 1.0 M in THF, 0.37 mmol) was then added dropwise and the reaction allowed to stir at room temperature for 4 hours. At this time the reaction was observed to be complete via <sup>1</sup>H-NMR monitoring and was quenched with H<sub>2</sub>O. The reaction was then extracted with DCM three times and the organic layer passed through a thin pad of silica, rinsing with DCM, and concentrated to yield the intermediate as a green solid. The solid was added to a flame dried round bottom flask under N<sub>2</sub> followed by dichloroethane (4.3 mL) and POCl<sub>3</sub> (0.024 mL, 0.259 mmol) and heated to reflux for 2 hours. At this point the reaction was observed to be complete via TLC monitoring for consumption of the intermediate. The reaction was added dropwise to ~100 mL of 1:1 hexanes/Et<sub>2</sub>O to precipitate the crude product. The crude product was filtered off, rinsed with Et<sub>2</sub>O, and redissolved into a clean round bottom flask using DCM. Then 5 mL of a saturated KPF<sub>6</sub> solution in MeCN was added dropwise to swap the existing anion for a PF<sub>6</sub><sup>-</sup> anion. The reaction was allowed to stir until the salt swap was complete by TLC (all the product moving off the baseline in 10% MeCN/DCM), approximately 1 hour. At this point, the solids were filtered off, rinsed with DCM, and the filtrate concentrated to yield the crude product. The crude was subjected to silica gel chromatography beginning with 100% DCM and gradually increasing to 10% MeCN/DCM to elute the product as a reddish-brown colored solution and a sparkly dark brown

solid when concentrated (72 mg, 0.047 mmol, 38%).  $^1\text{H}$ - and  $^{13}\text{C}$ -NMRs were not obtained due to insufficient resolution (broad peaks, no discernable aromatic signals) in a multitude of NMR solvents attempted, likely due to the presence of thermally accessible diradicals. Anal. Calcd for 7:1 dye ( $\text{C}_{105}\text{H}_{119}\text{N}_6\text{PF}_6$ ): $\text{CH}_2\text{Cl}_2$ : C, 77.84; H, 7.42; N, 5.18. Found: C, 77.87; H, 7.46; N, 5.14. Residual DCM is included in the formula herein as it was observed to be present in a  $^1\text{H}$  NMR of the sample, despite being placed on vacuum overnight. HRMS  $m/z$  calculated for  $\text{C}_{105}\text{H}_{119}\text{N}_6^+ [\text{M} - \text{PF}_6^-]^+$  1464.9525, found 1464.9496. IR ( $\text{cm}^{-1}$ ) 3186, 3053, 2954, 2929, 2870, 1576, 1534, 1510, 1460, 1403, 1365, 1347, 1314, 1286, 1259, 1192, 1128, 1108, 1054, 1003.

# NMR & HRMS SPECTRA

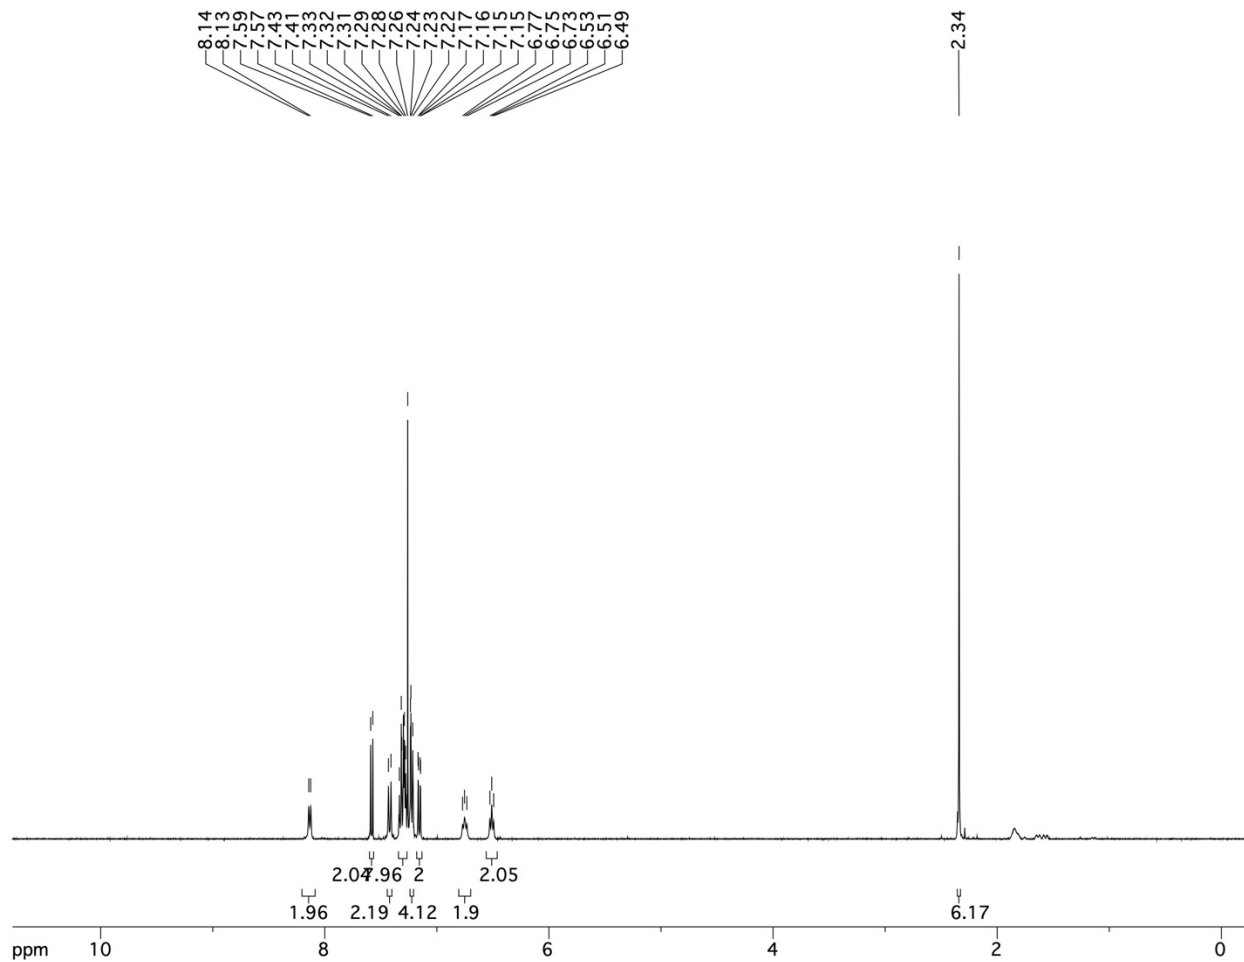

**Figure S38.** <sup>1</sup>H NMR (400 MHz) of **6** in CDCl<sub>3</sub>.

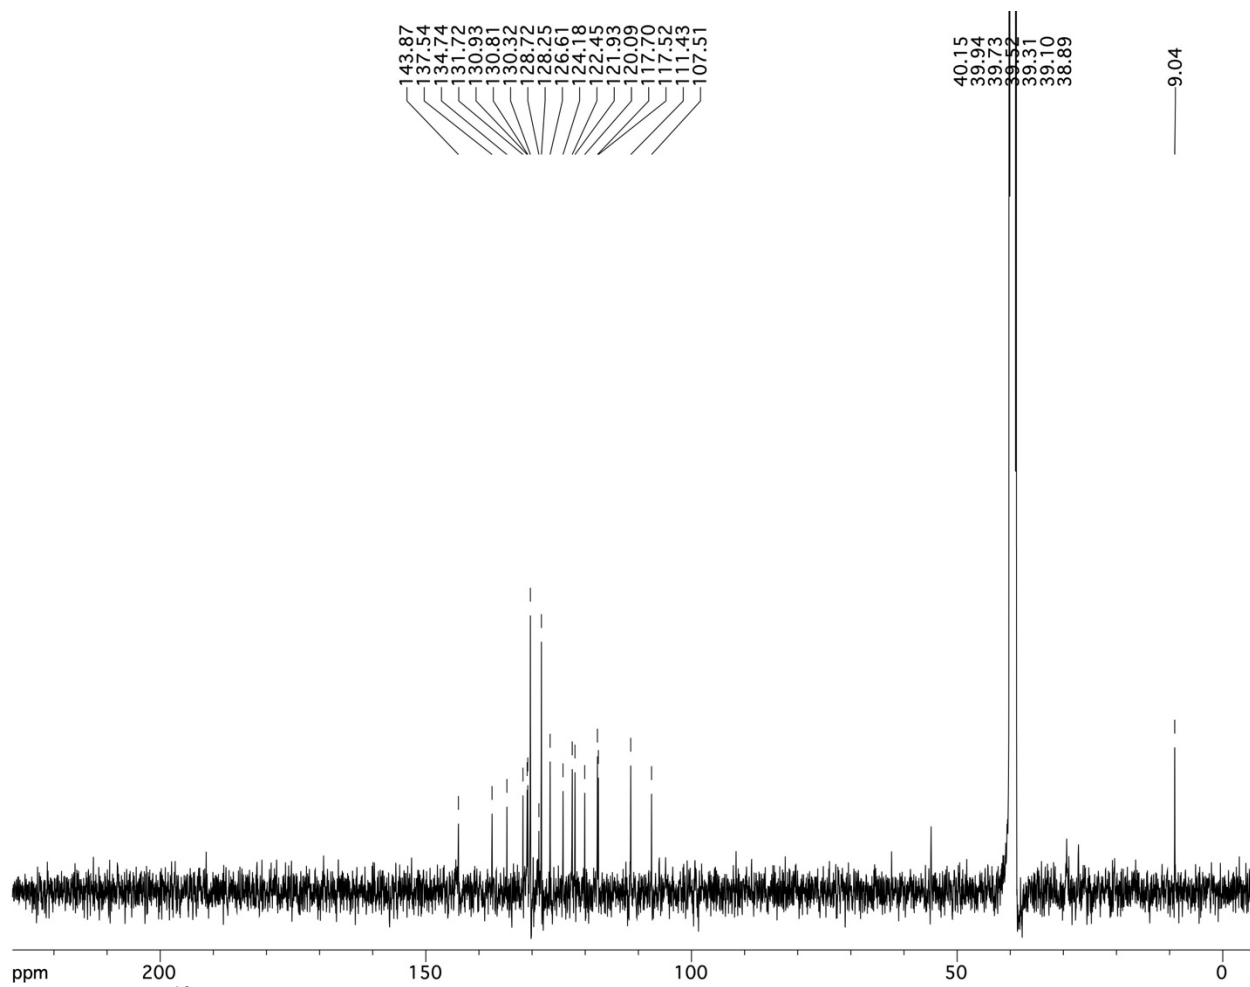

**Figure S39.**  $^{13}\text{C}$  NMR (101 MHz) of **6** in  $\text{DMSO-d}_6$ .



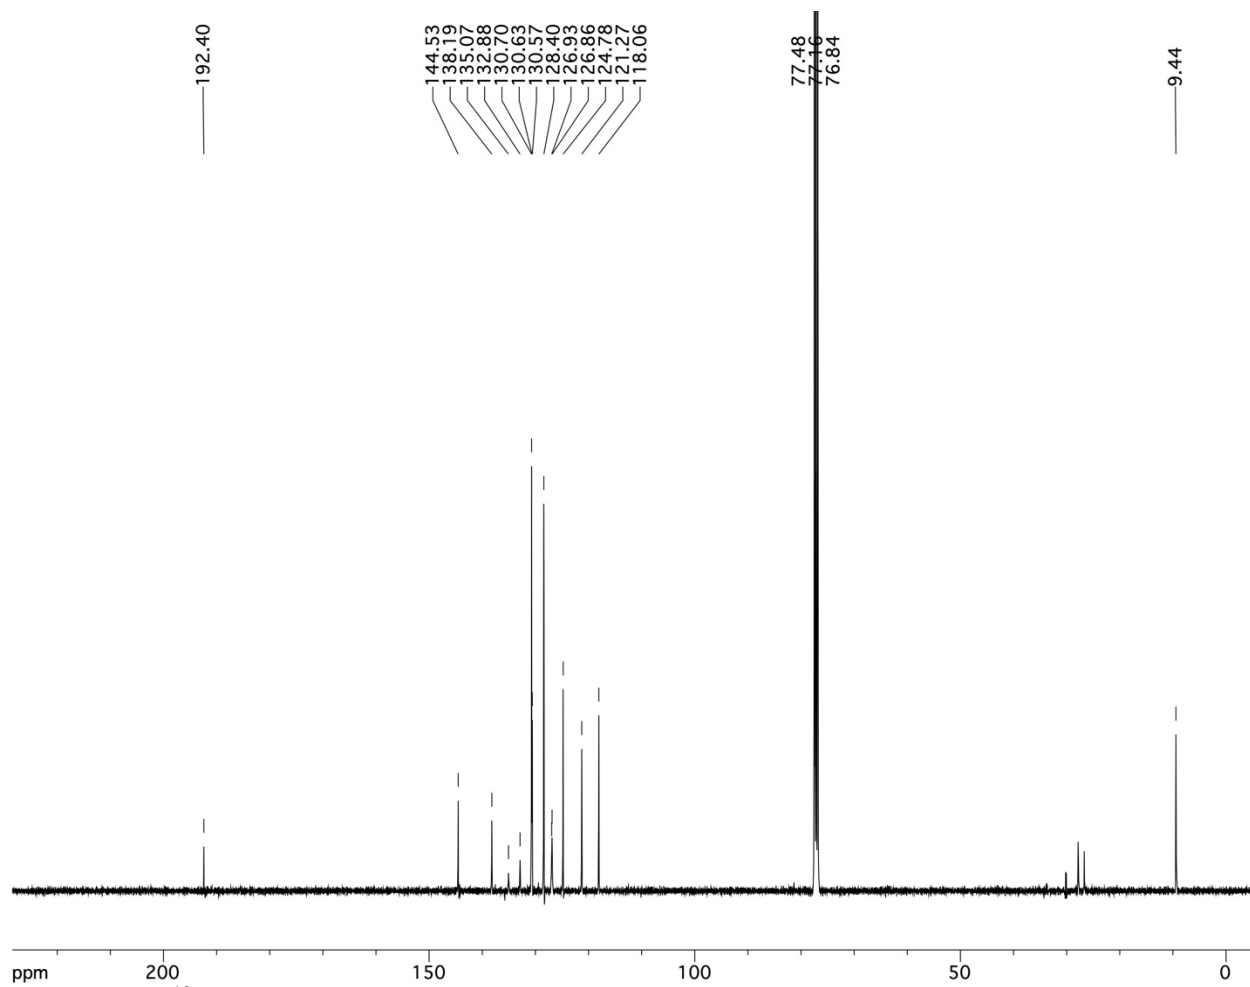

**Figure S40.**  $^{13}\text{C}$  NMR (101 MHz) of **6** in  $\text{CDCl}_3$ .

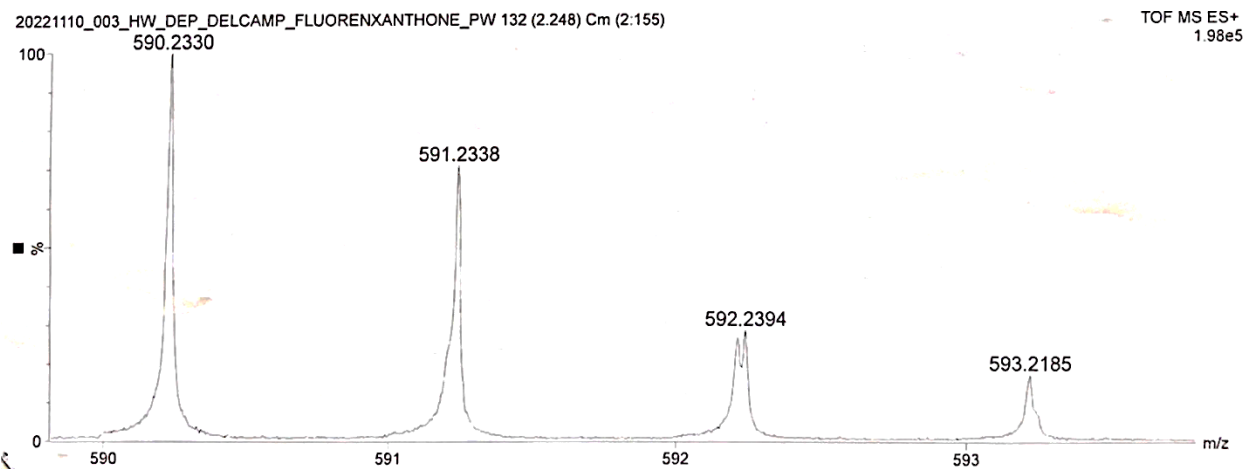

**Figure S41.** HRMS of **6**.

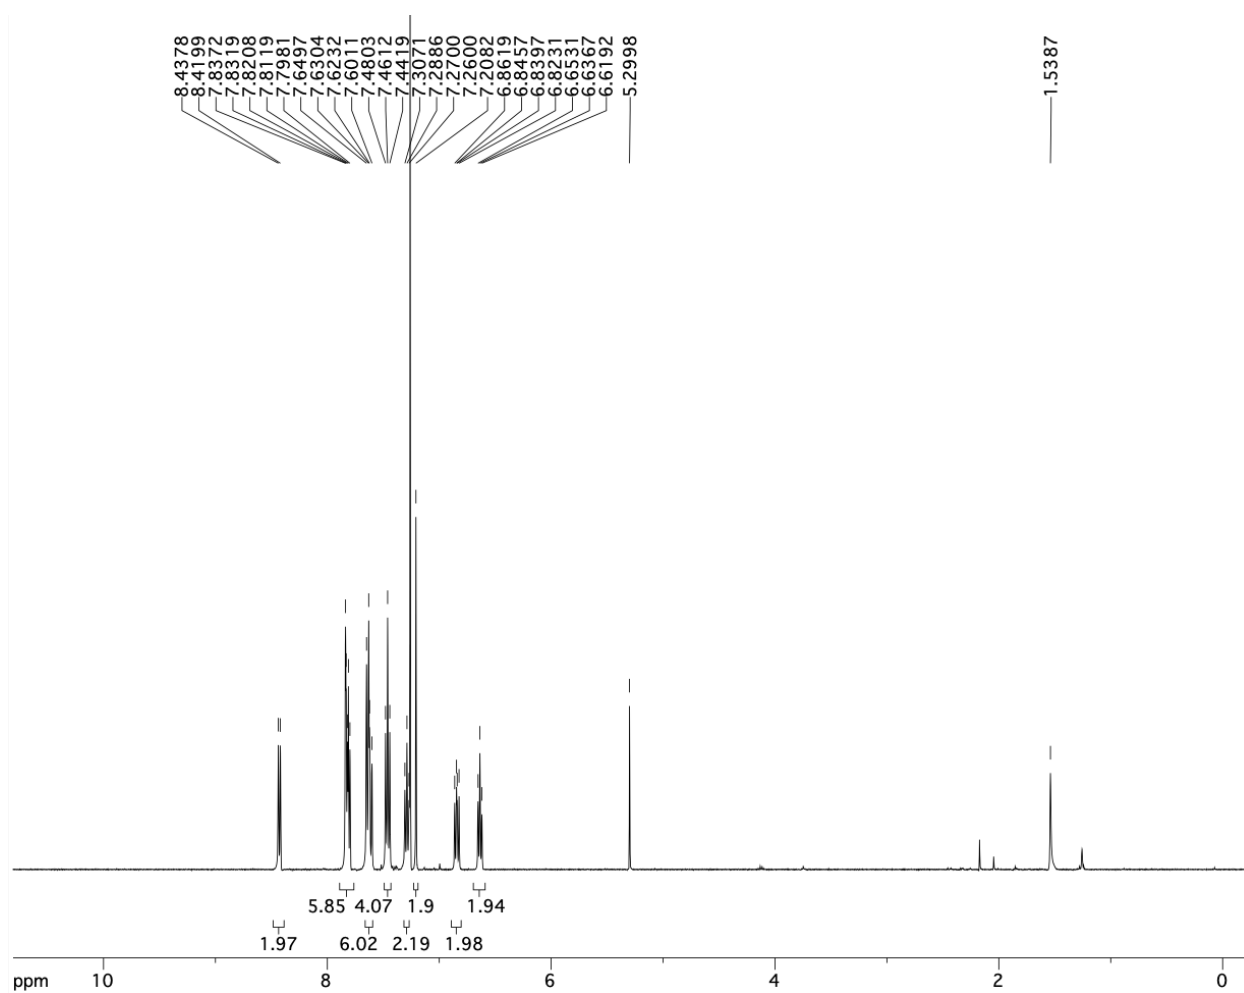

**Figure S42.**  $^1\text{H}$  NMR (400 MHz) of **7** in  $\text{CDCl}_3$ .

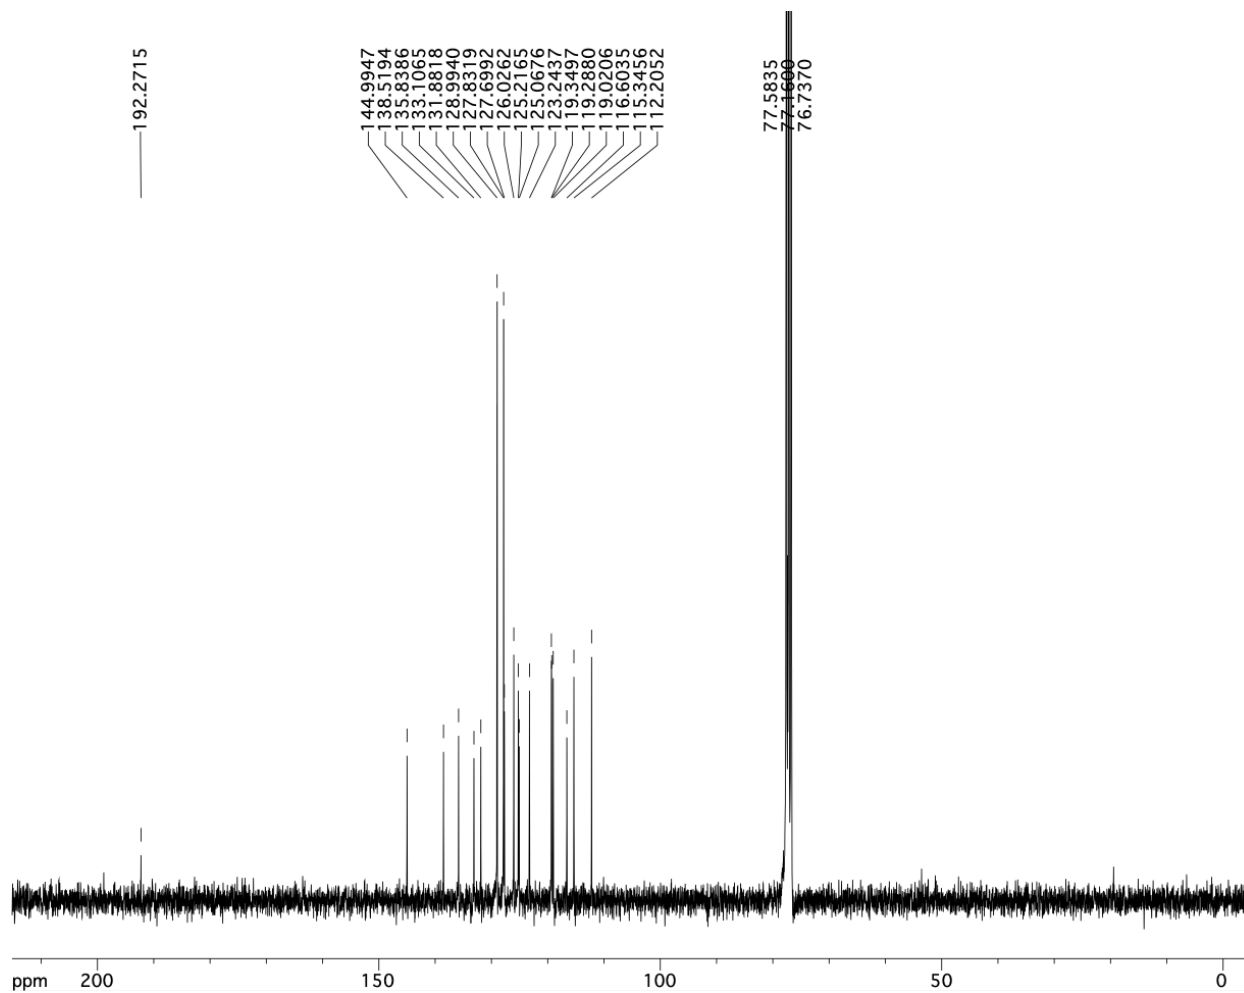

**Figure S43.**  $^{13}\text{C}$  NMR (101 MHz) of **7** in  $\text{CDCl}_3$ .

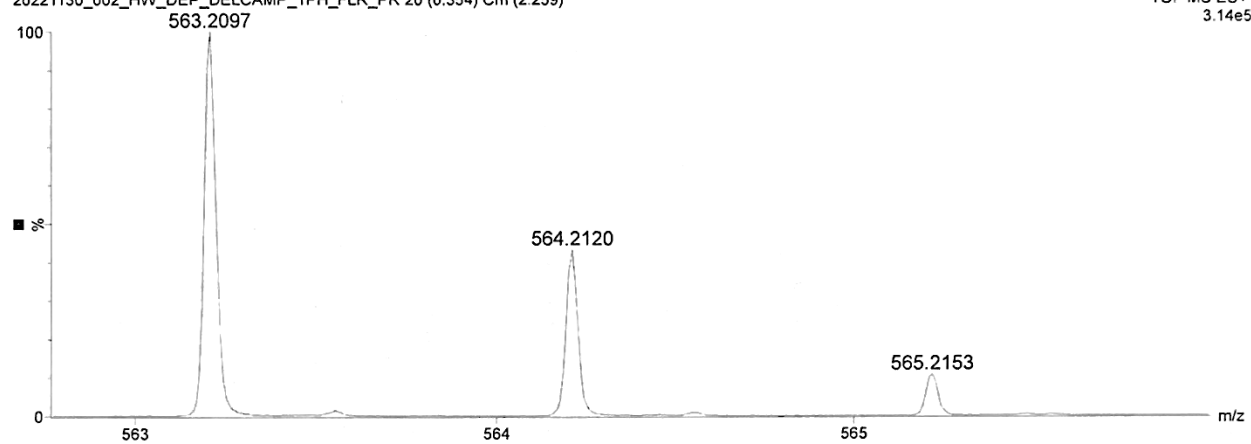

**Figure S44.** HRMS of 7.

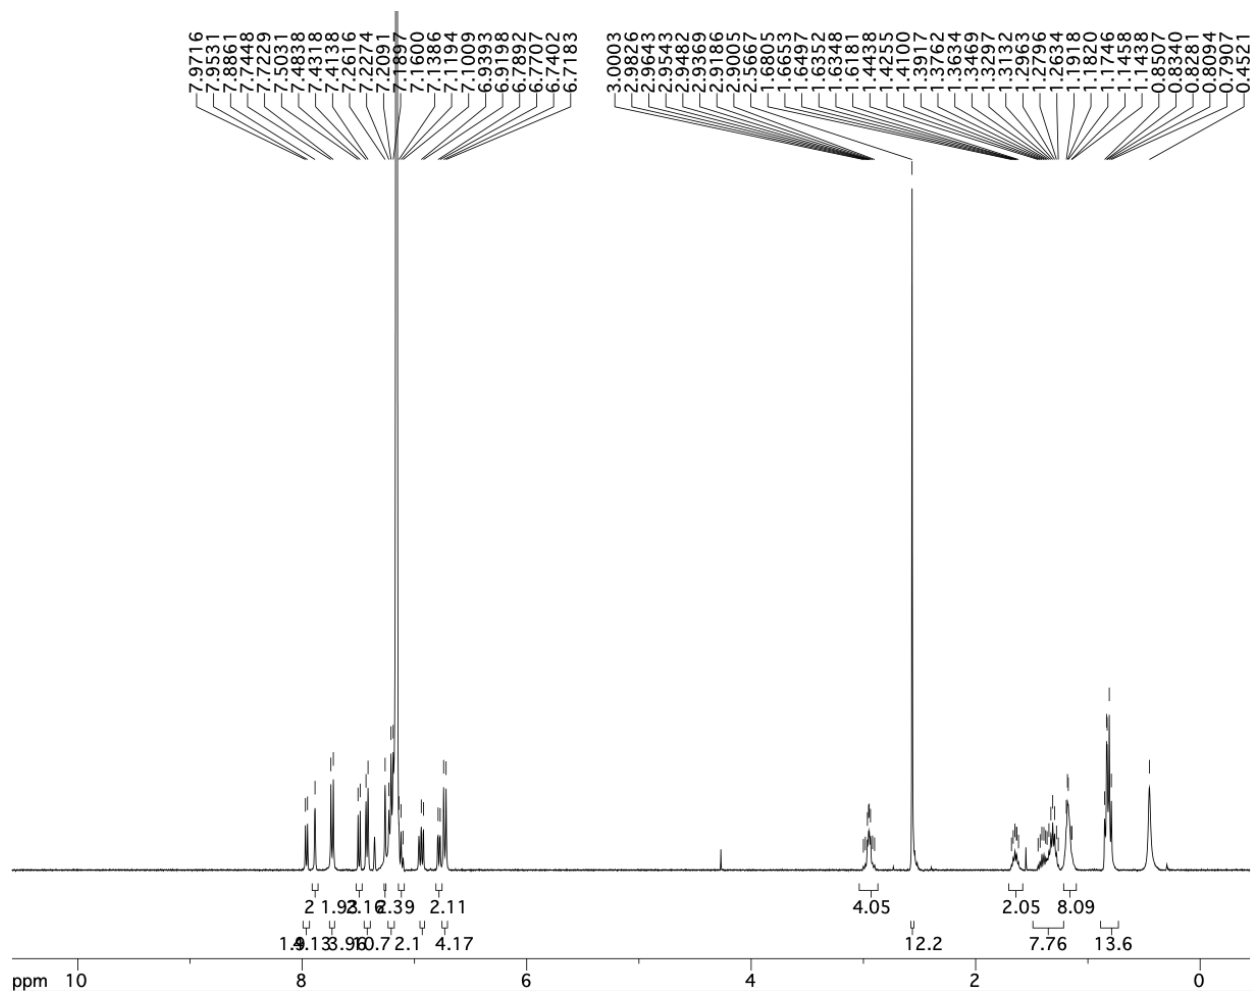

**Figure S45.**  $^1\text{H}$  NMR (400 MHz) of **8** in  $\text{C}_6\text{D}_6$ .

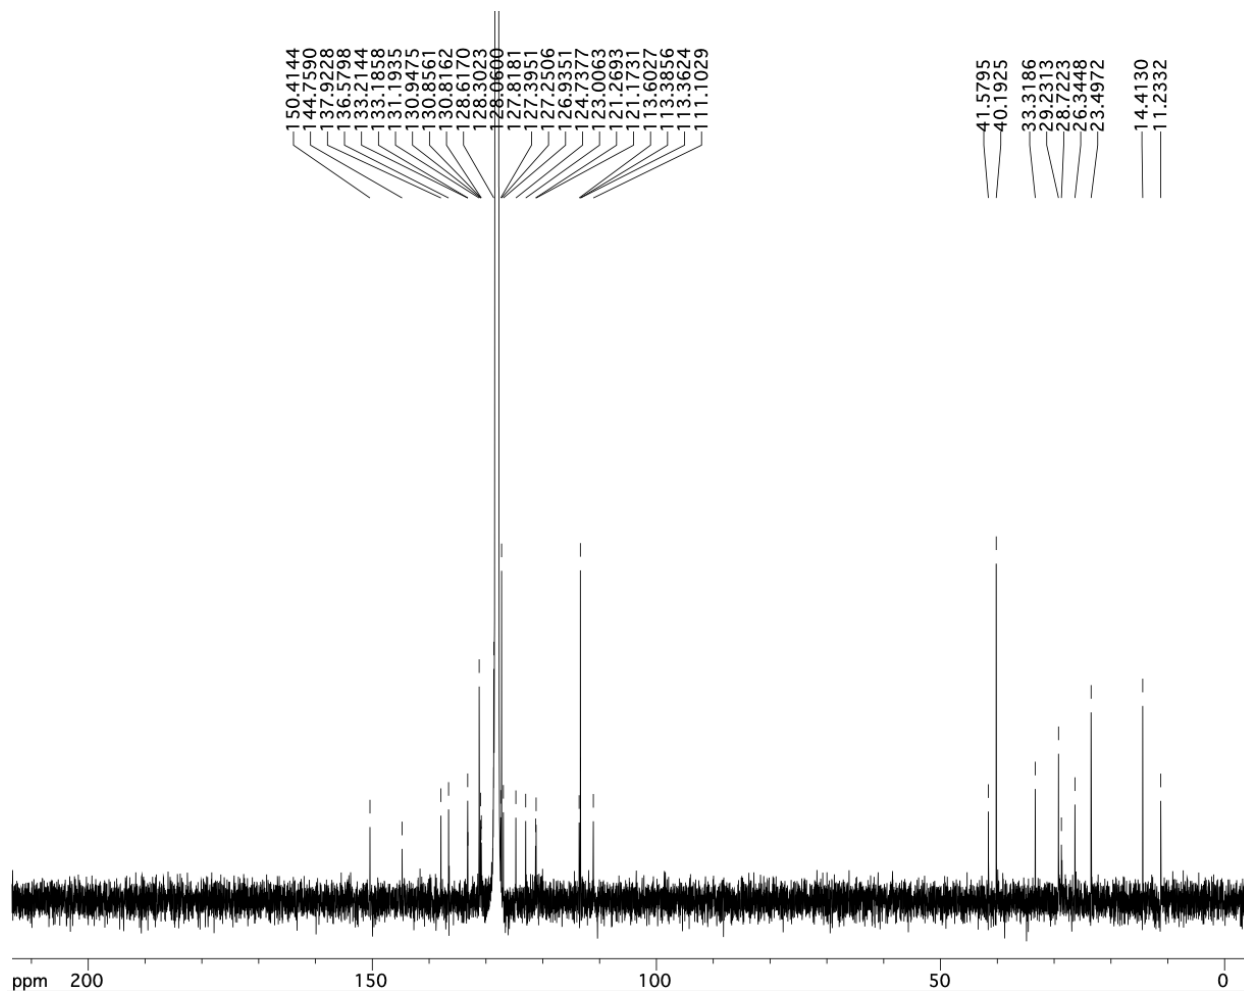

**Figure S46.**  $^{13}\text{C}$  NMR (101 MHz) of **8** in  $\text{C}_6\text{D}_6$ .

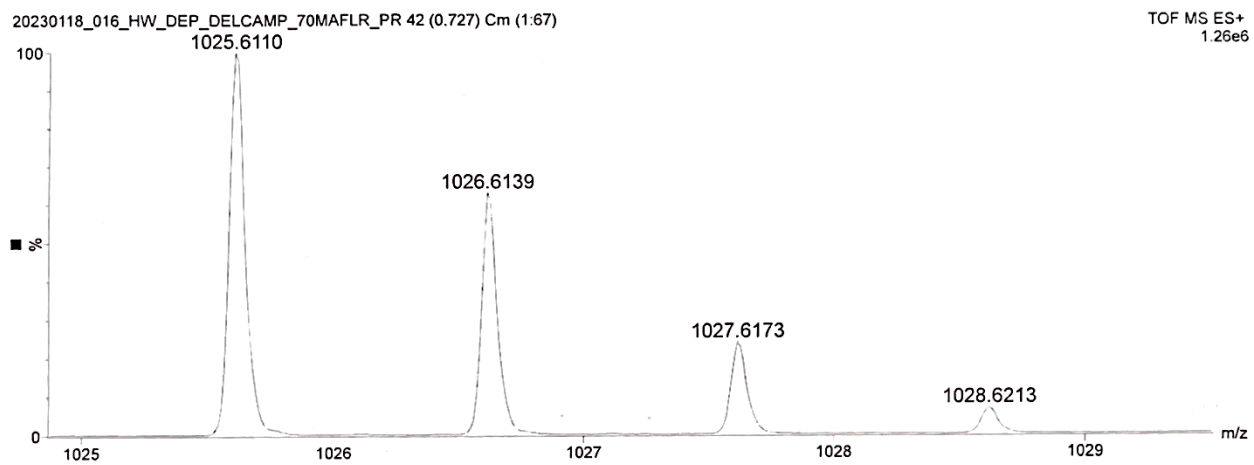

**Figure S47. HRMS of 8.**



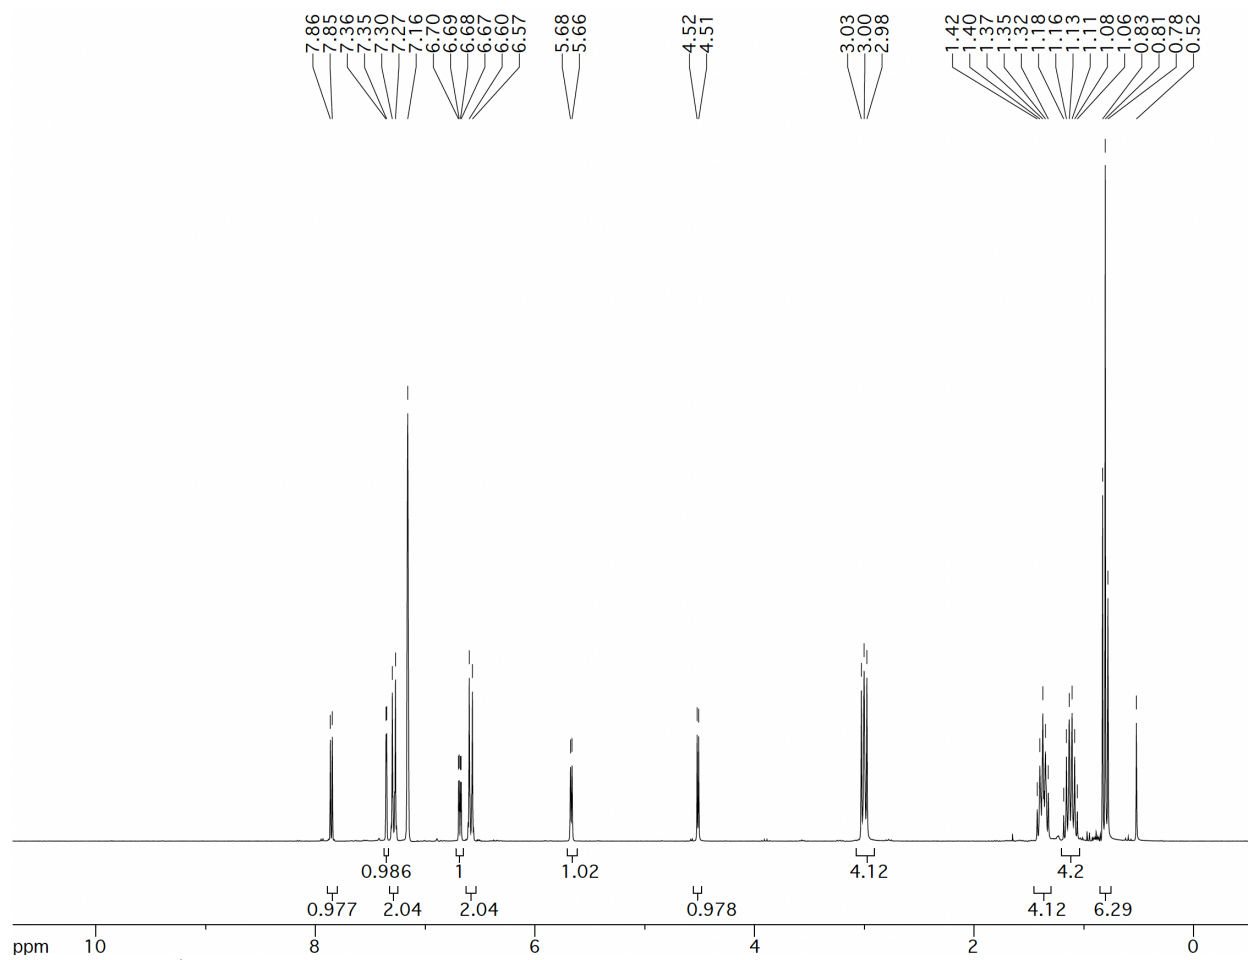

**Figure S48.**  $^1\text{H}$  NMR (300 MHz) of **12** in  $\text{C}_6\text{D}_6$ .

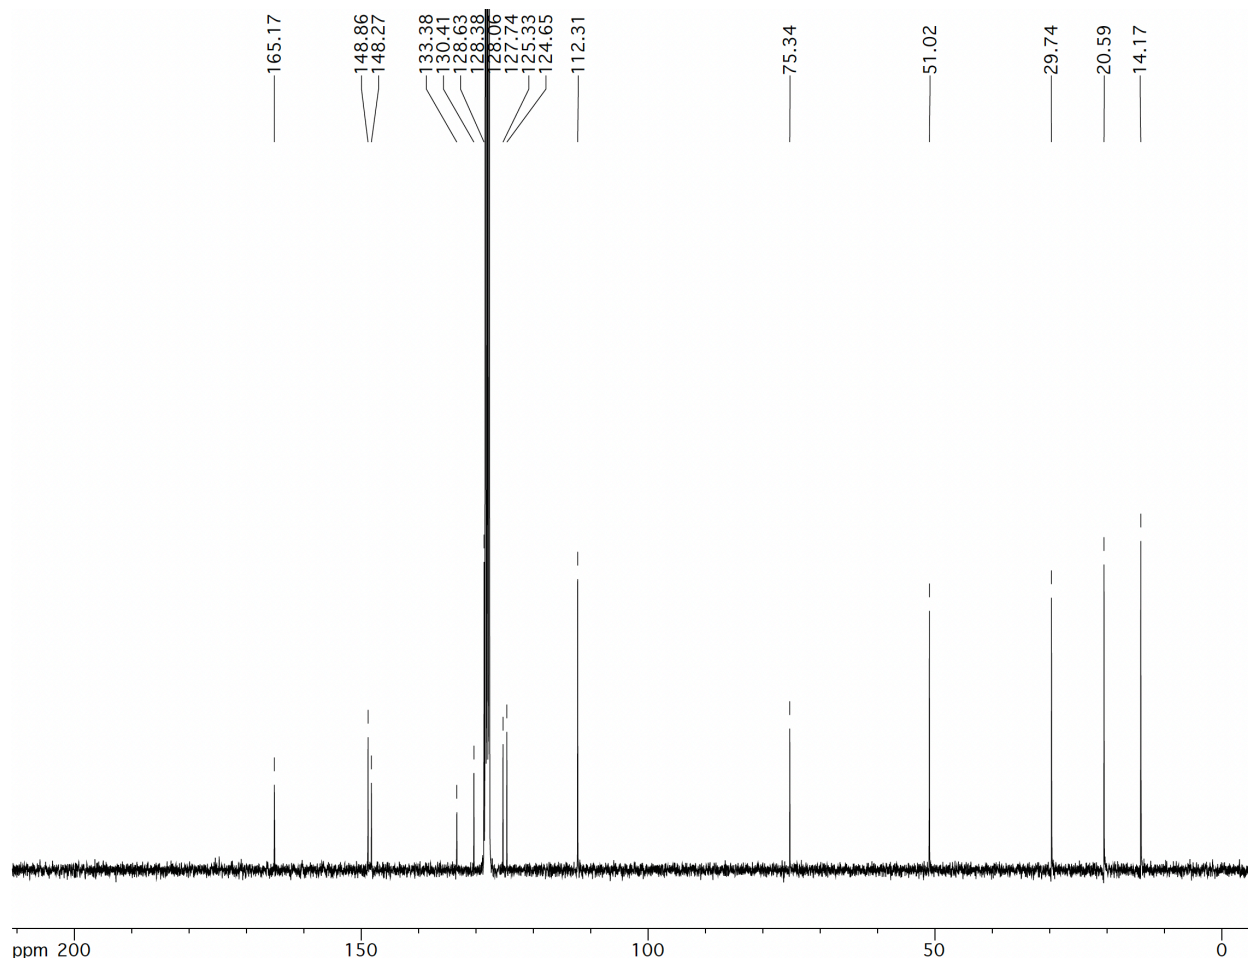

**Figure S49.**  $^{13}\text{C}$  NMR (75 MHz) of 12 in  $\text{C}_6\text{D}_6$ .

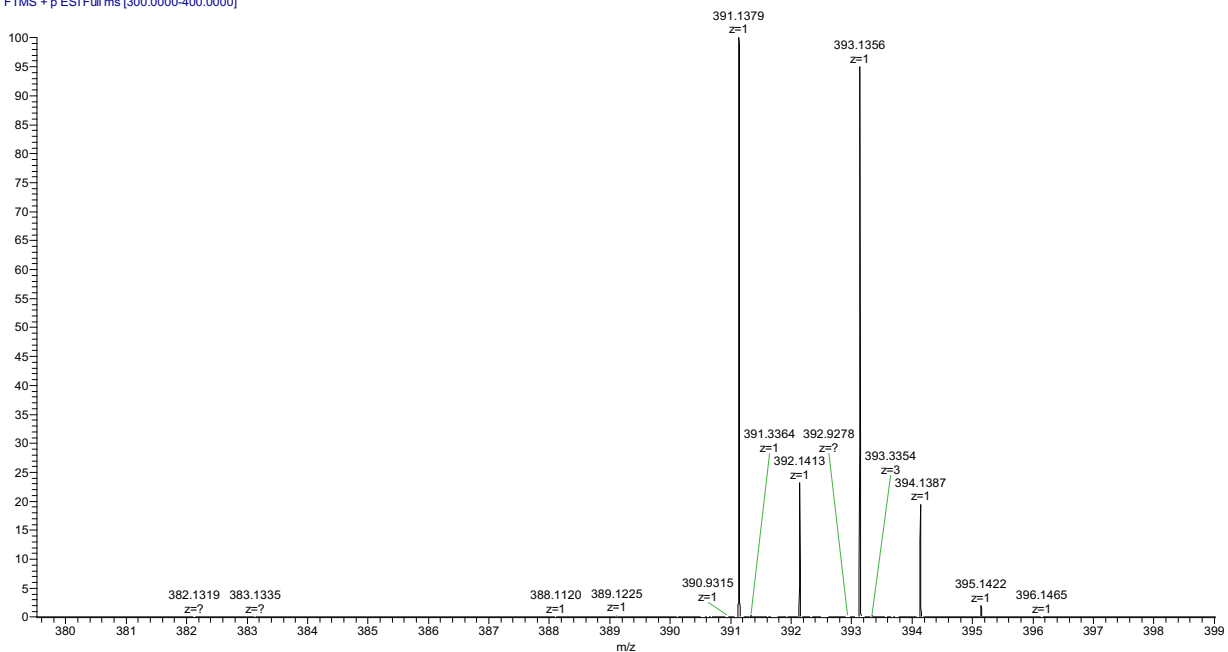

**Figure S50.** HRMS of 12.

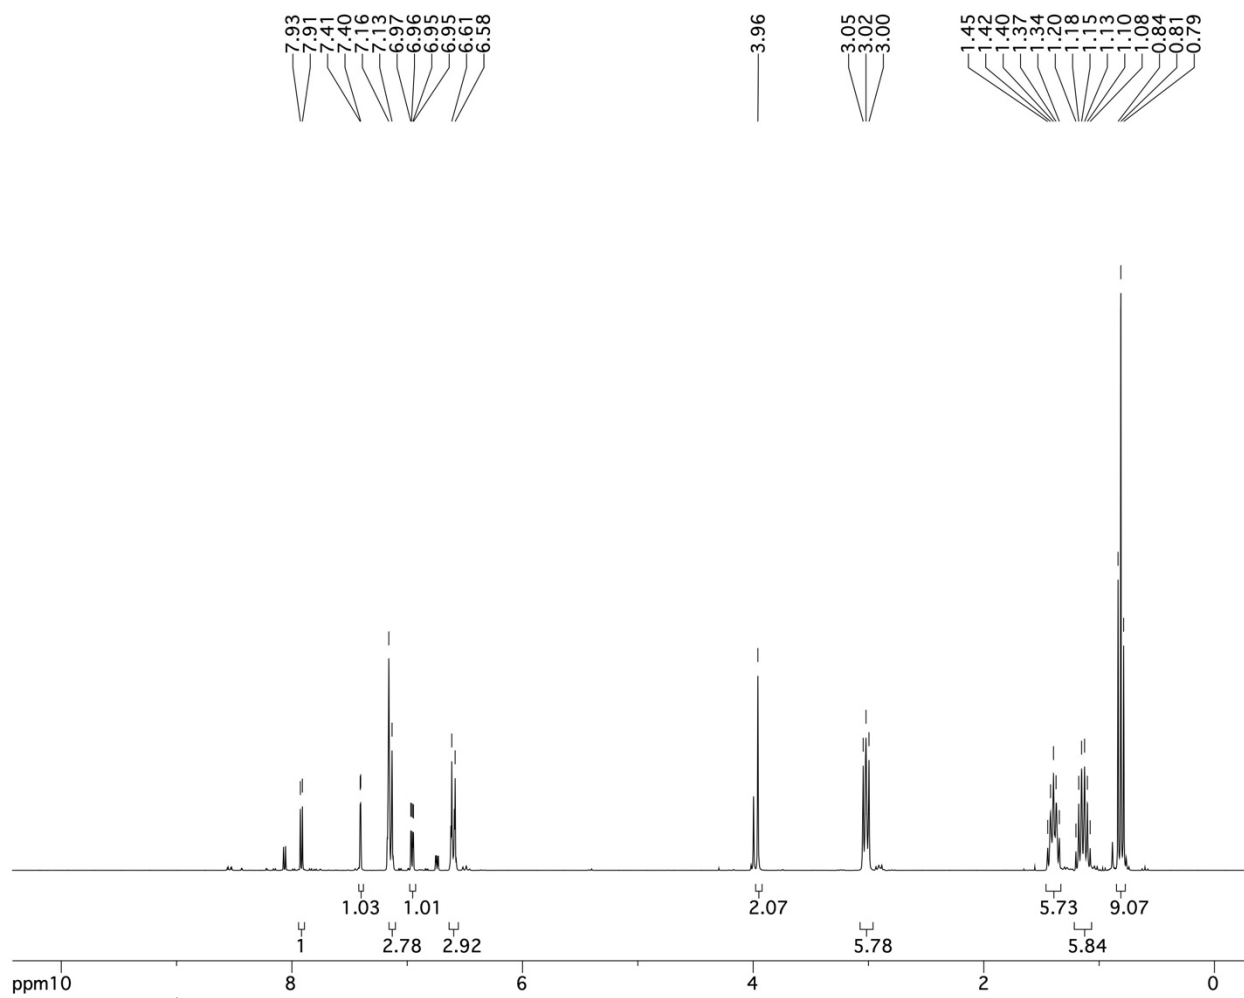

**Figure S51.**  $^1\text{H}$  NMR (300 MHz) of **13** in  $\text{C}_6\text{D}_6$ .

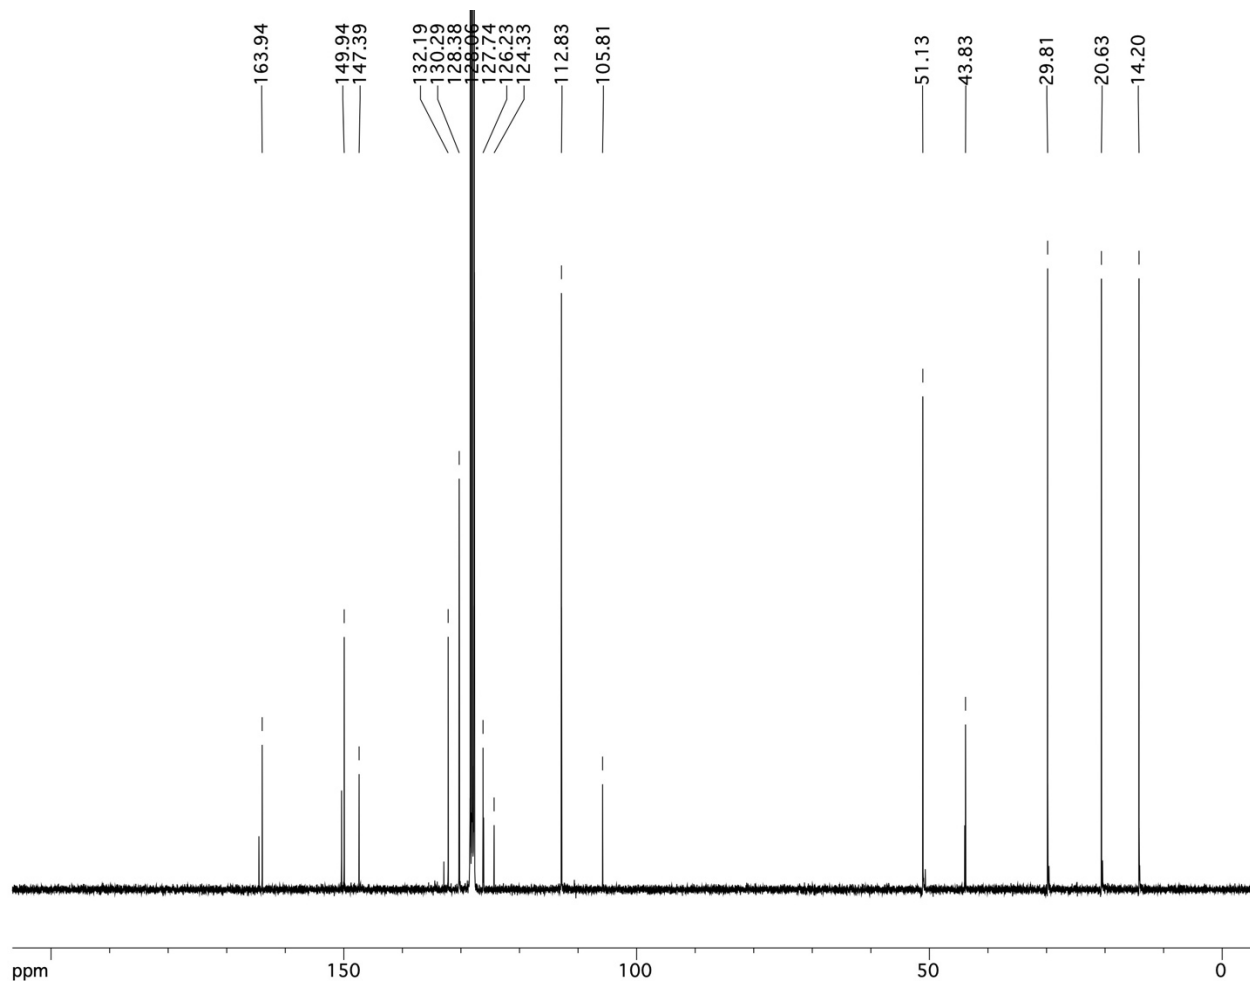

**Figure S52.**  $^{13}\text{C}$  NMR (75 MHz) of **13** in  $\text{C}_6\text{D}_6$ .

17DBA-Pyr-Deox #1 RT: 0.00 AV: 1 NL: 4.19E7  
T: FTMS + p ESI Full ms [300.0000-400.0000]

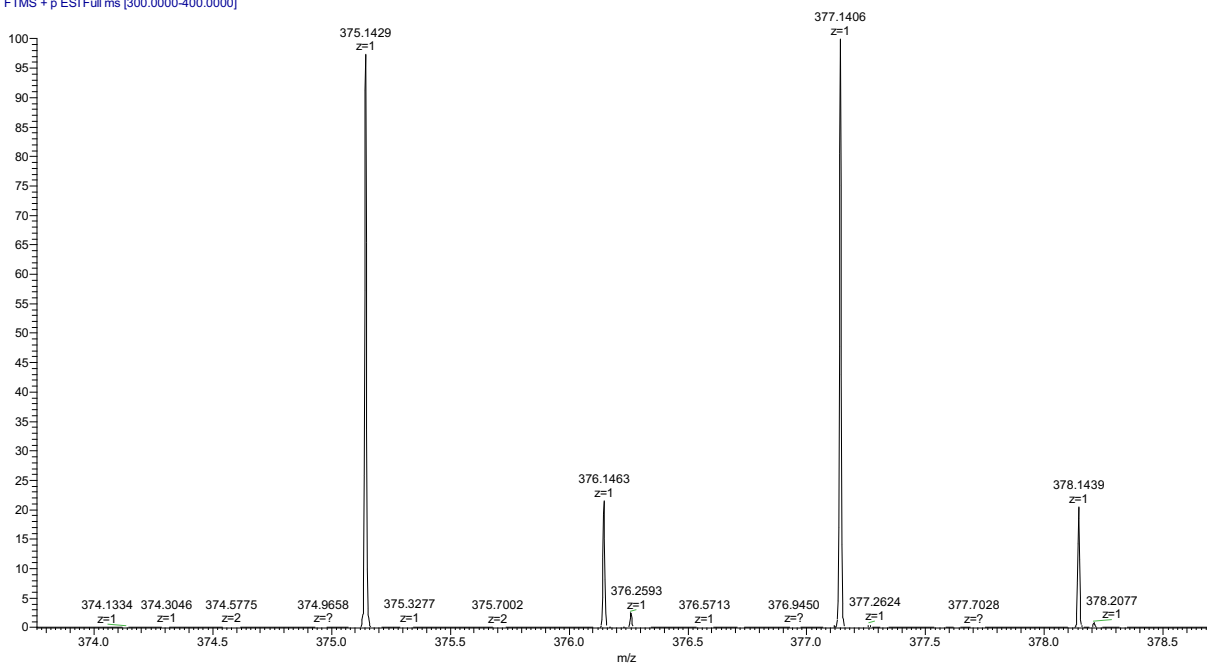

Figure S53. HRMS of 13.

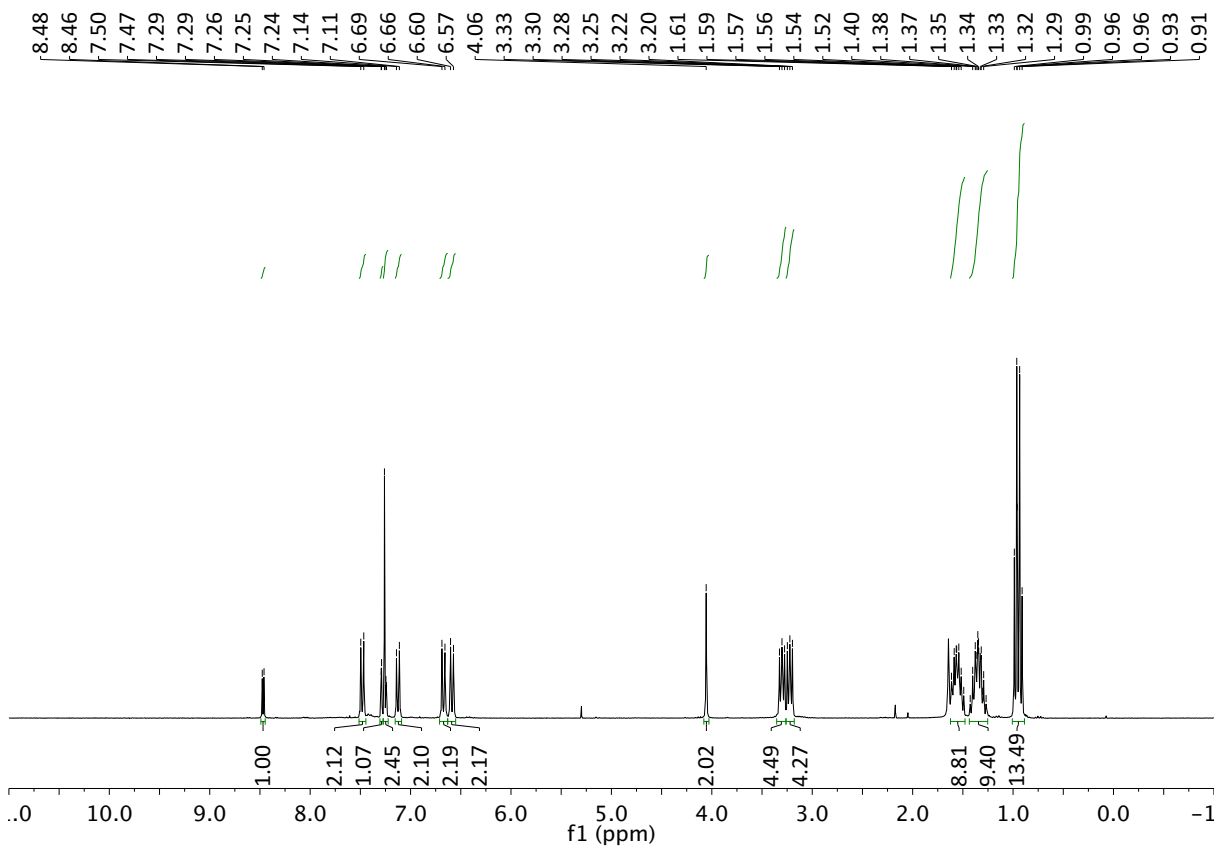

**Figure S54.**  $^1\text{H}$  NMR (300 MHz) of **15** in  $\text{CDCl}_3$ .

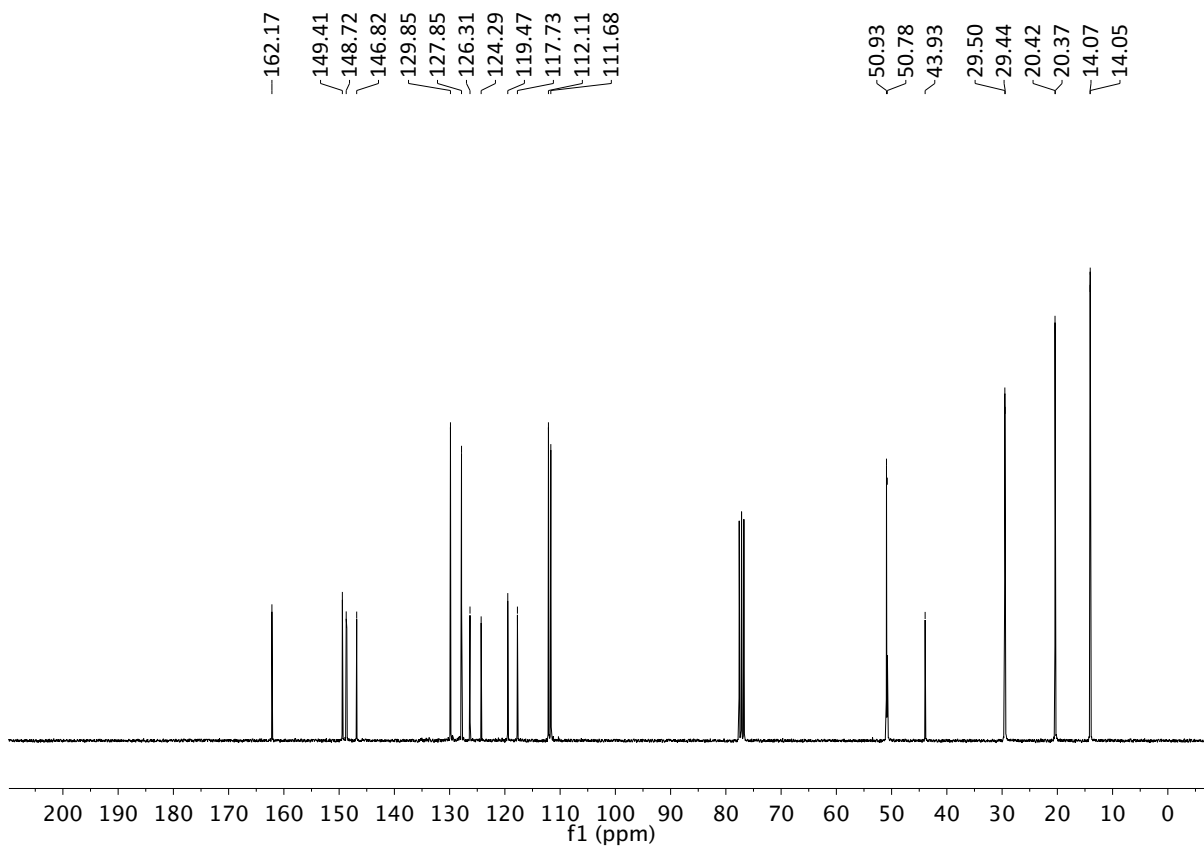

**Figure S55.**  $^{13}\text{C}$  NMR (75 MHz) of **15** in  $\text{CDCl}_3$ .



DBA-Pyridine #1 RT: 0.00 AV: 1 NL: 1.98E9  
T: FTMS + p ESI Full ms [400.0000-700.0000]

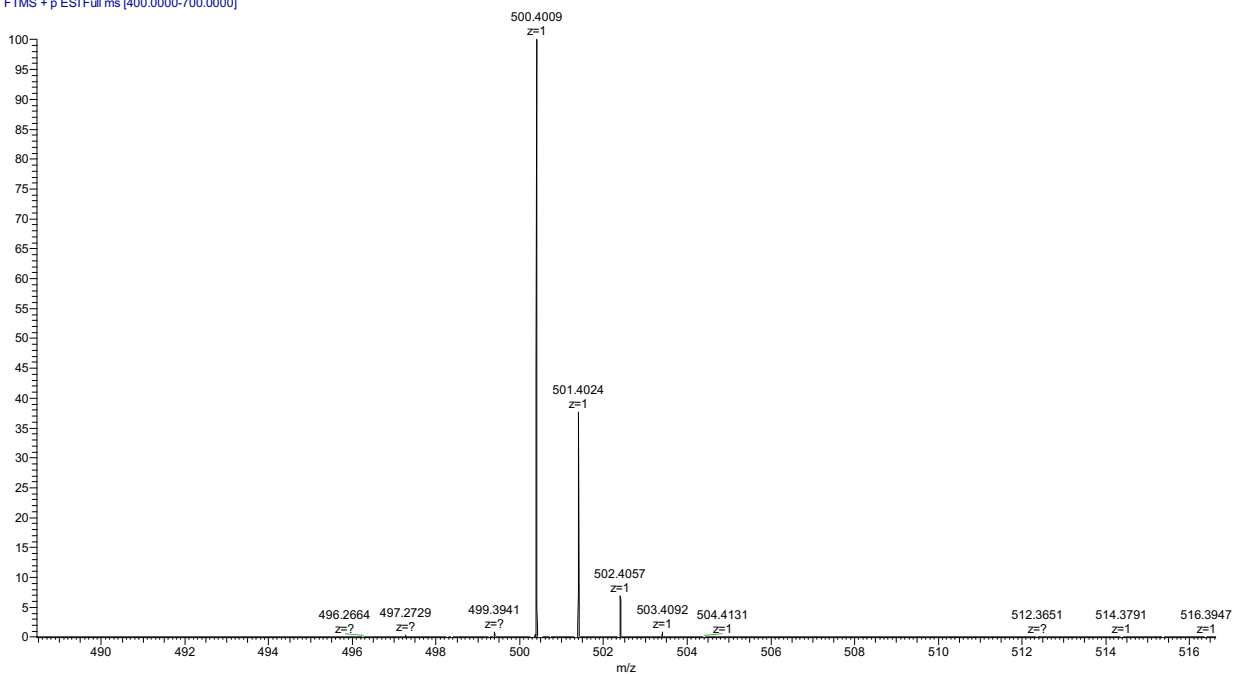

Figure S56. HRMS of 15.

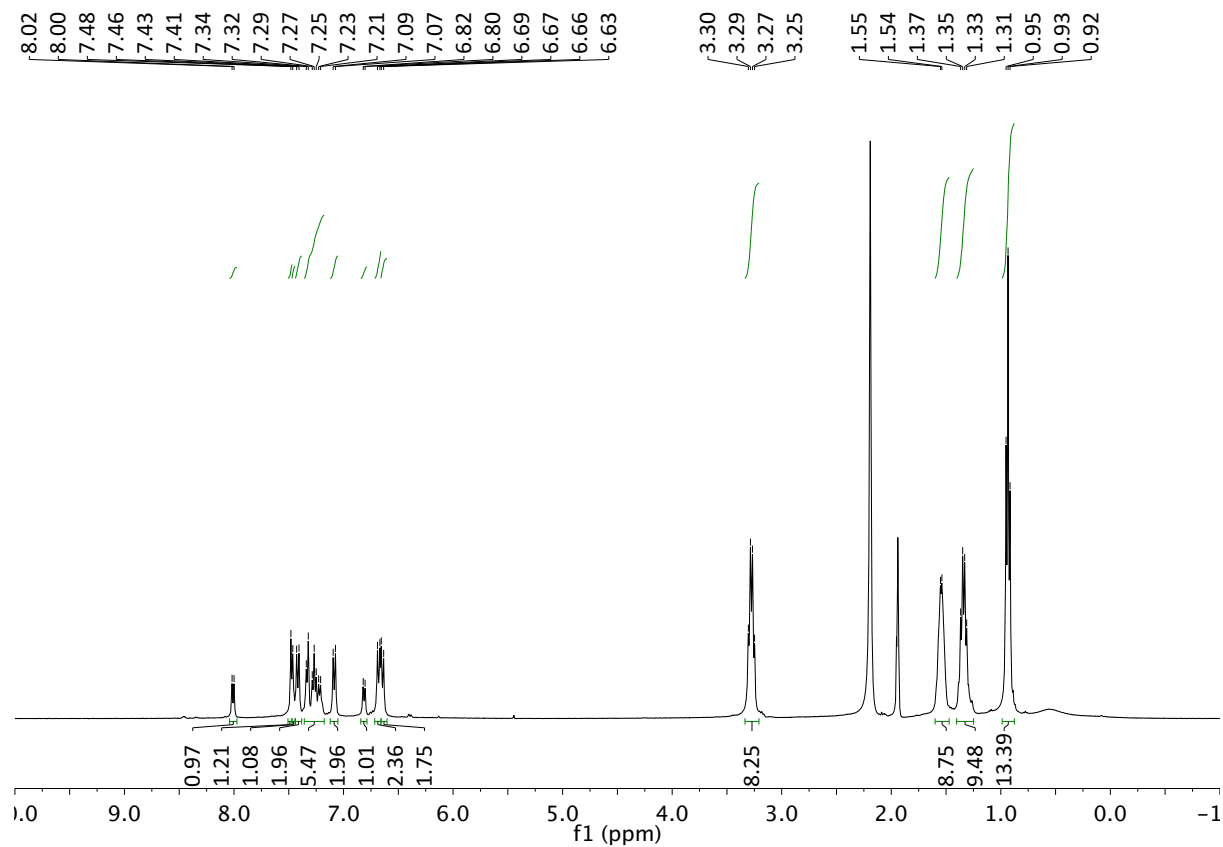

**Figure S57.**  $^1\text{H}$  NMR (400 MHz) of **5** in  $\text{CD}_3\text{CN}$ .

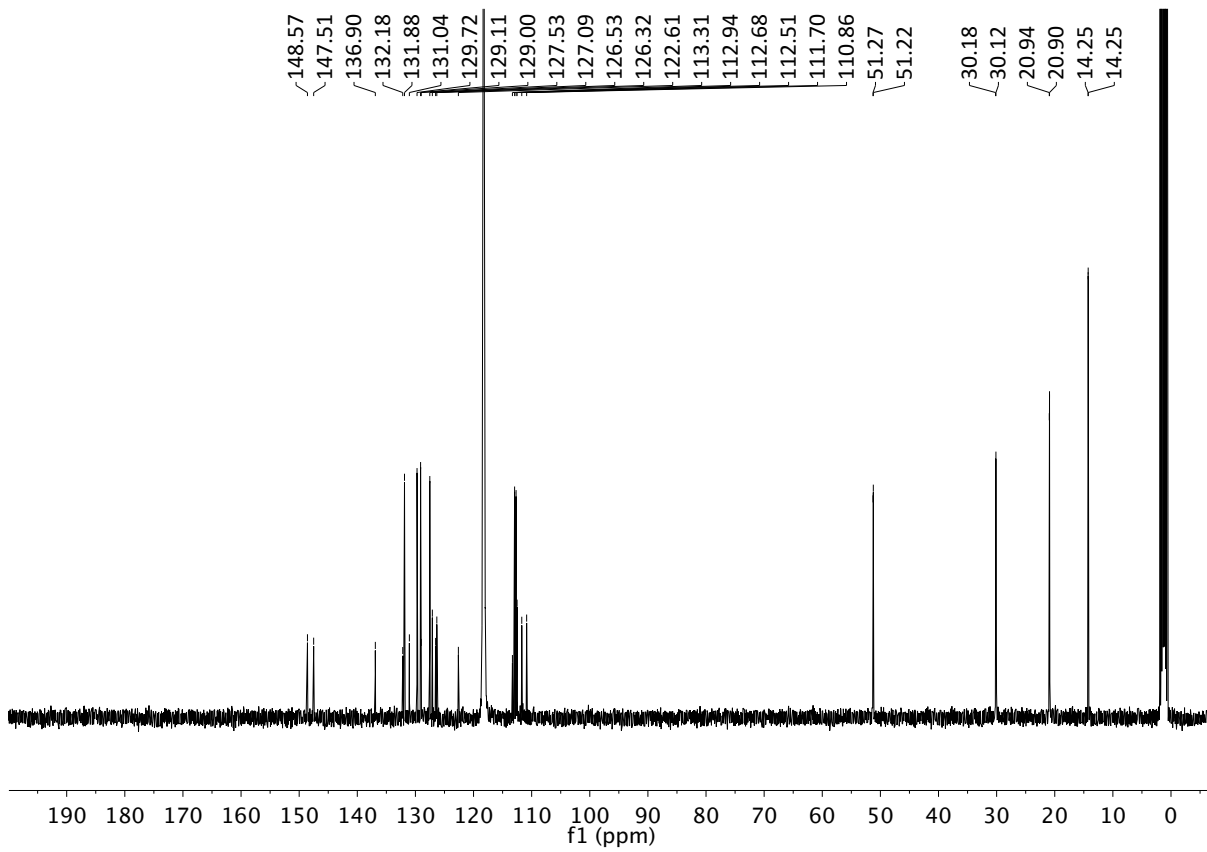

**Figure S58.**  $^{13}\text{C}$  NMR (101 MHz) of **5** in  $\text{CD}_3\text{CN}$ .

DBA-Indz #1 RT: 0.00 AV: 1 NL: 3.65E7  
T: FTMS + p ESI Full ms [510.0000-630.0000]

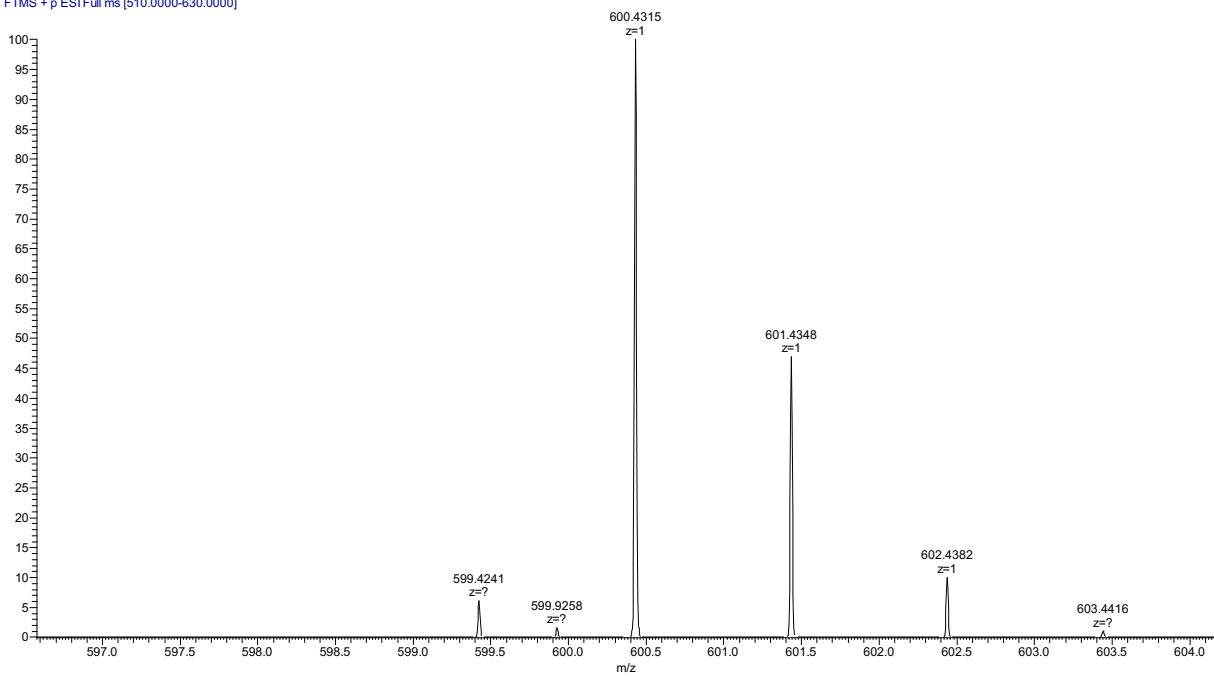

**Figure S59.** HRMS of **5**.

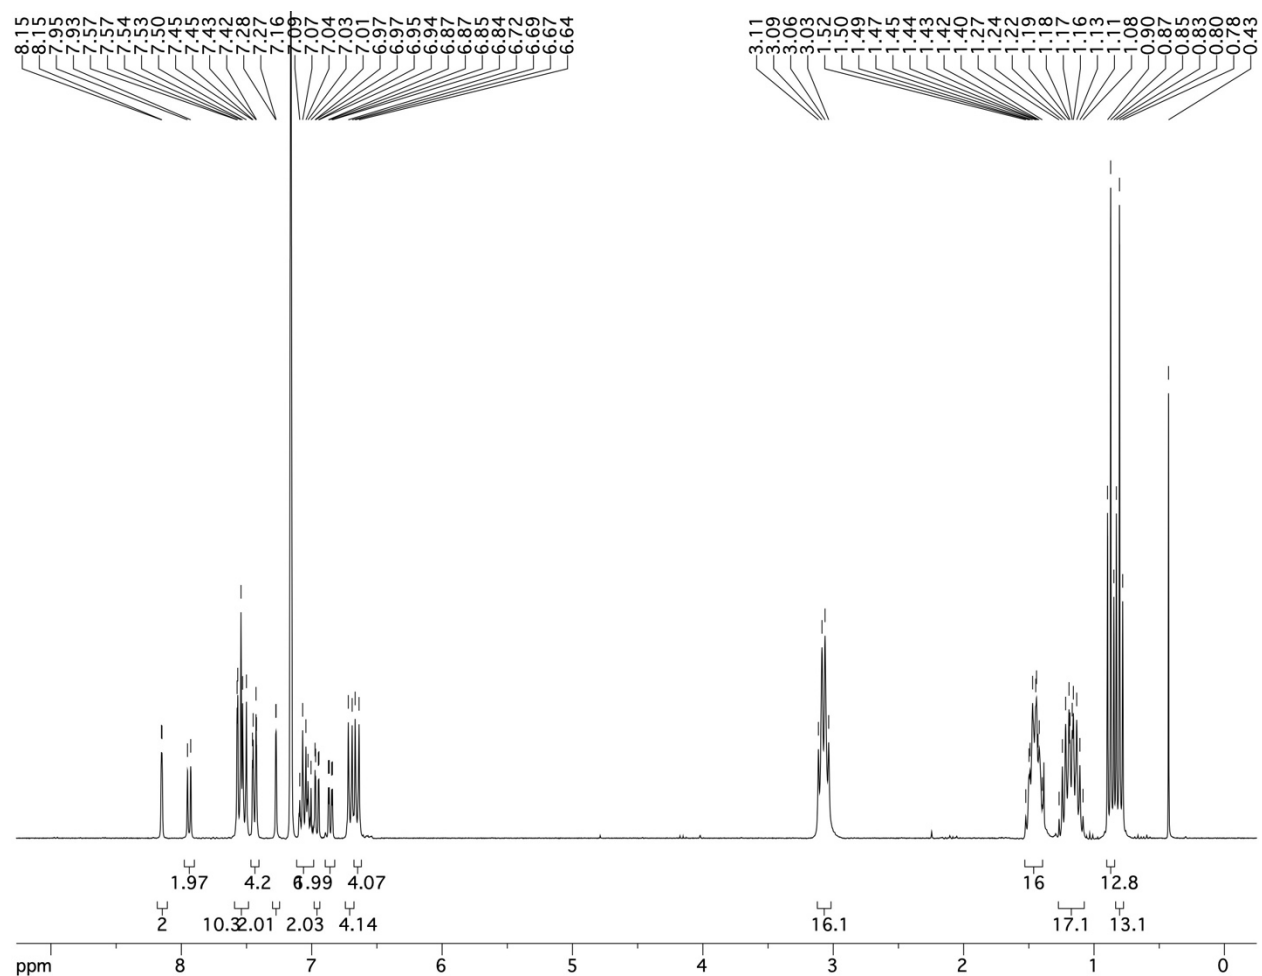

**Figure S60.**  $^1\text{H}$  NMR (300 MHz) of **9** in  $\text{C}_6\text{D}_6$ .

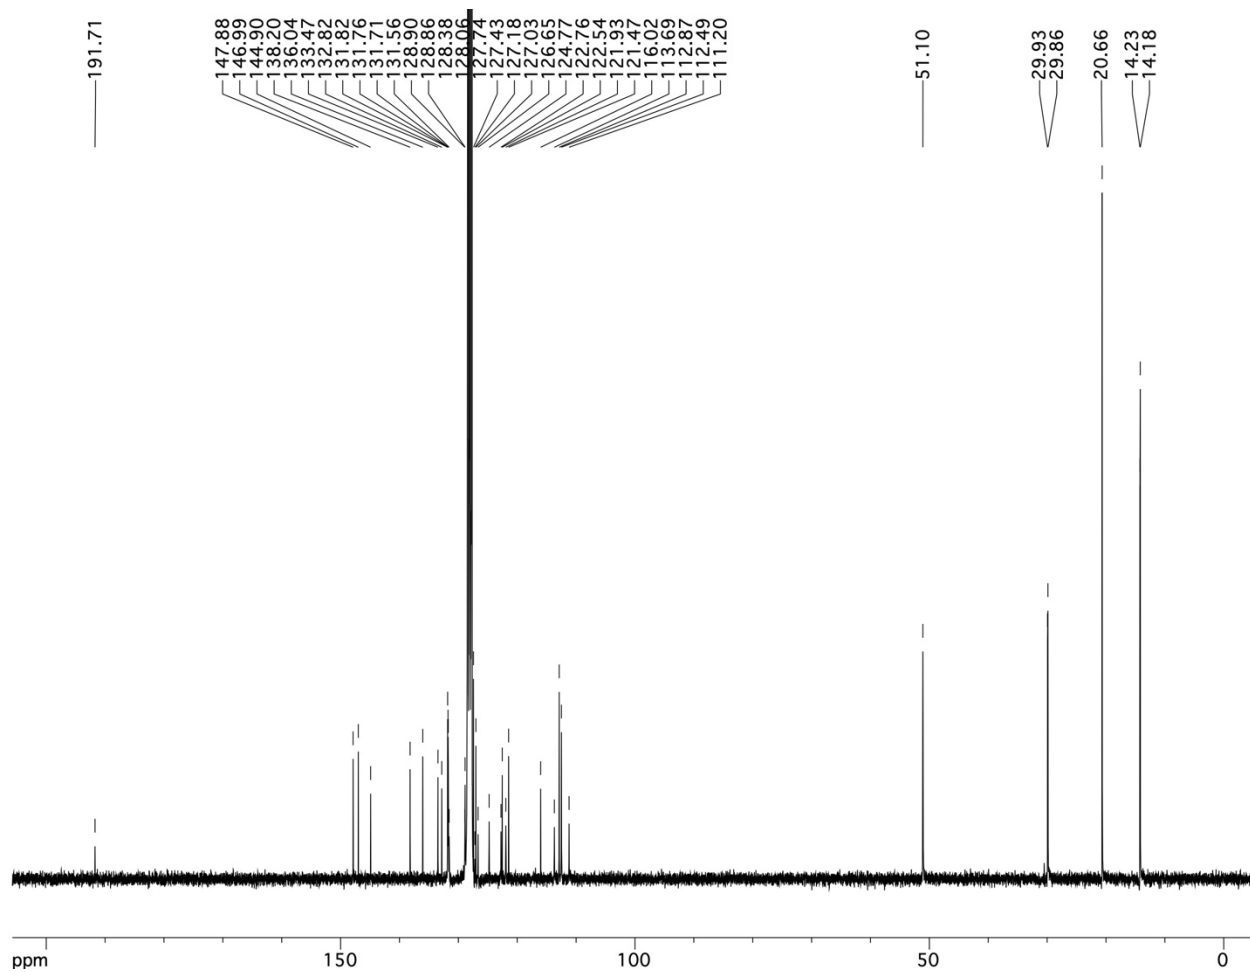

**Figure S61.**  $^{13}\text{C}$  NMR (75 MHz) of **9** in  $\text{C}_6\text{D}_6$ .

17DBA-Fluorenone #1 RT: 0.01 AV: 1 NL: 1.02E7  
T: FTMS + p ESI Full ms [600.0000-1400.0000]

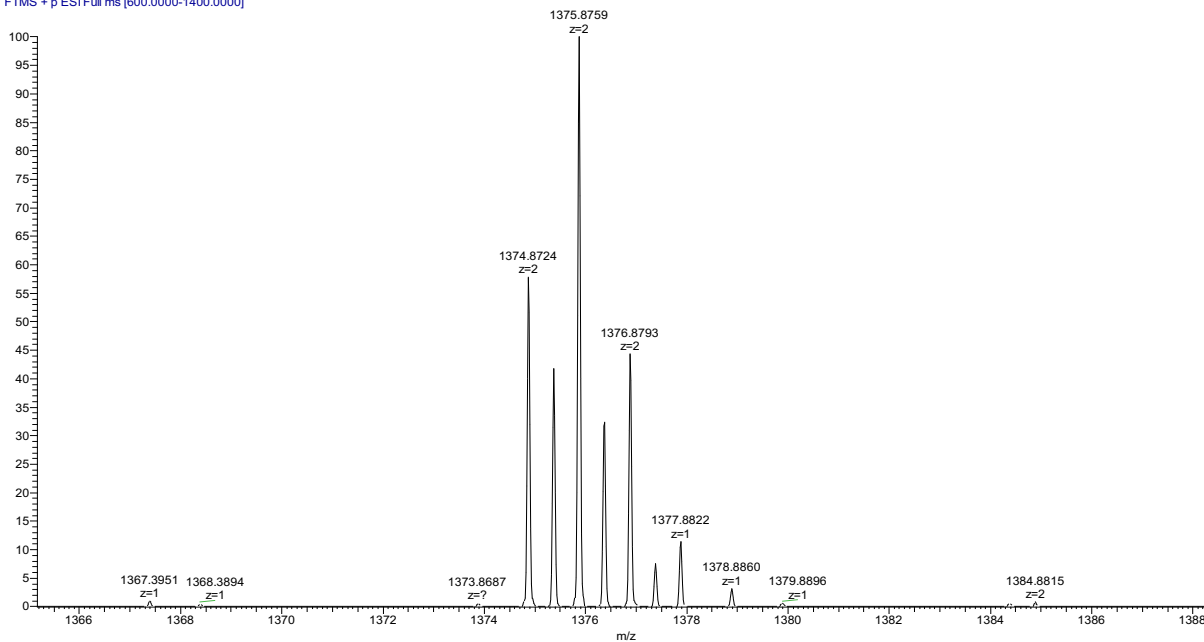

Figure S62. HRMS of 9.

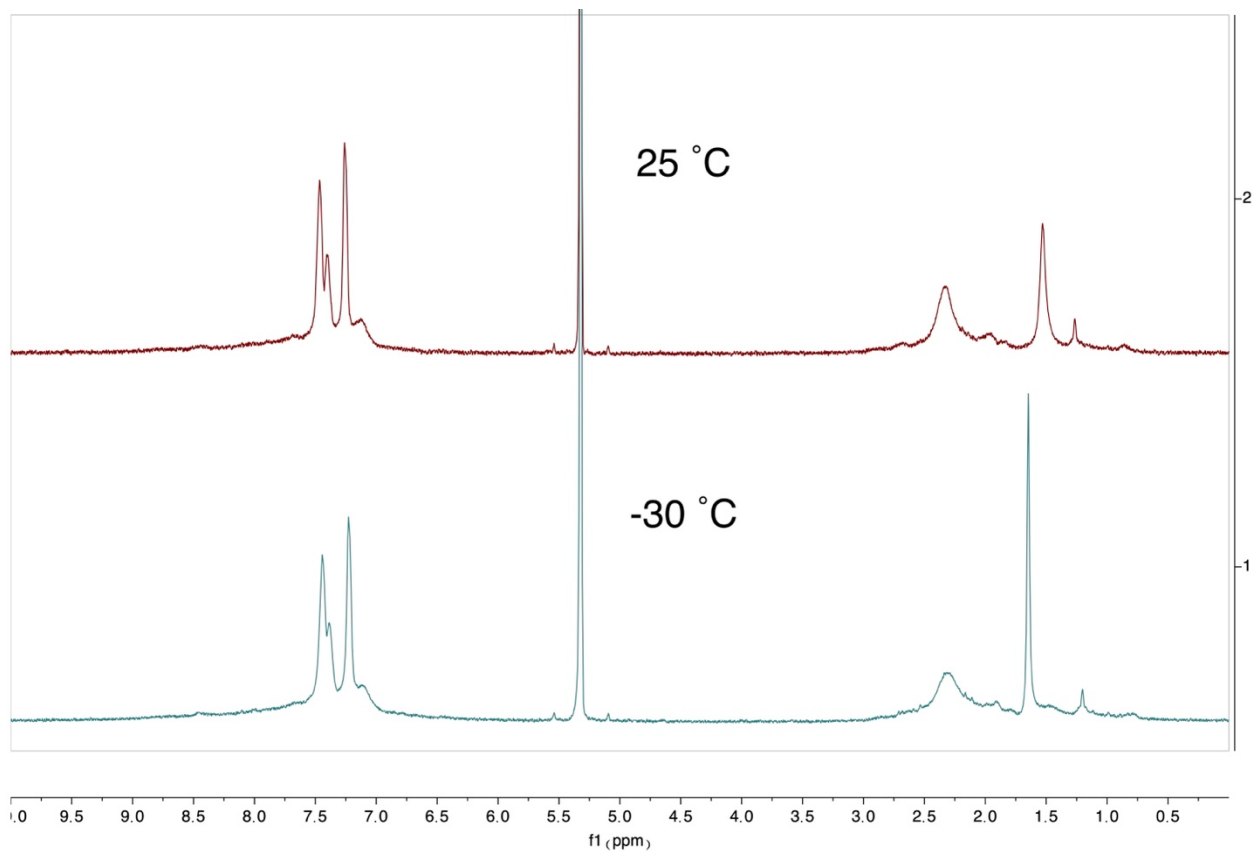

**Figure S63.** <sup>1</sup>H NMR (400 MHz) of <sup>2</sup>PhFluIndz in CD<sub>2</sub>Cl<sub>2</sub> at room temperature (25 °C, top) and at -30 °C (bottom) showing no discernable improvement in resolution at the lower limit of our instrumentation in terms of temperature.



20230118\_013\_HW\_DEP\_DELCAMP\_2PHFLUINDZ\_PW 15 (0.270) Cm (1:74)

TOF MS ES+  
1.24e8

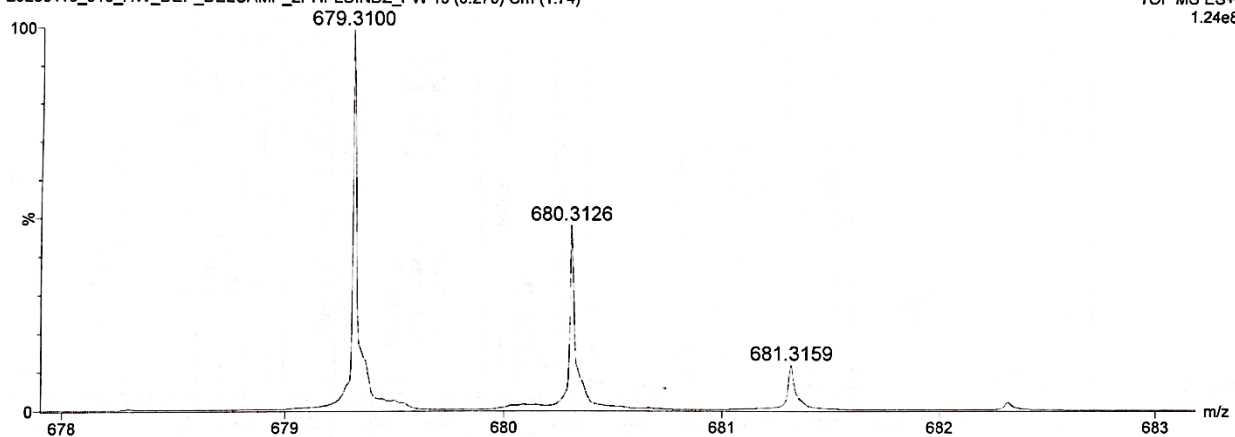

Figure S64. HRMS of <sup>2</sup>PhFluIndz.

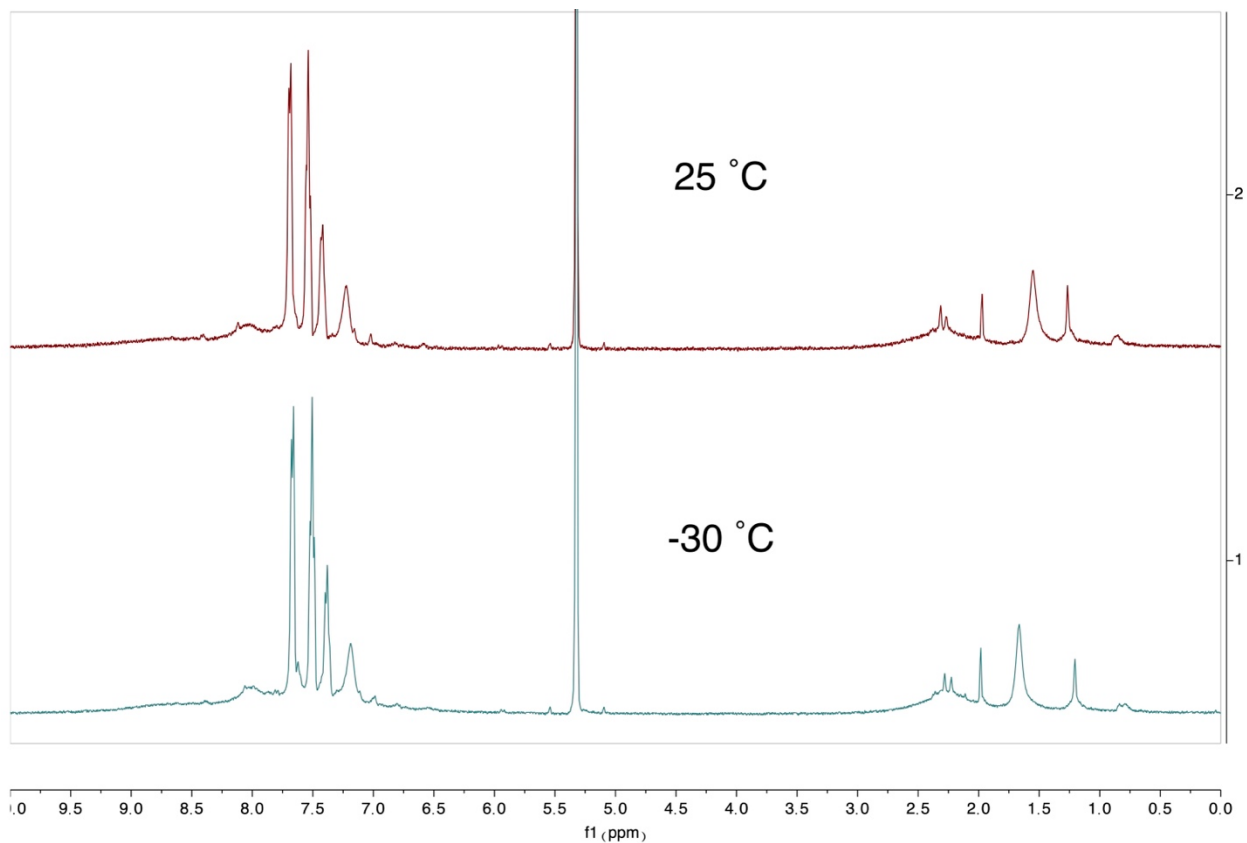

**Figure S65.** <sup>1</sup>H NMR (400 MHz) of <sup>1</sup>PhFluIndz in CD<sub>2</sub>Cl<sub>2</sub> at room temperature (25 °C, top) and at -30 °C (bottom) showing no discernable improvement in resolution at the lower limit of our instrumentation in terms of temperature.

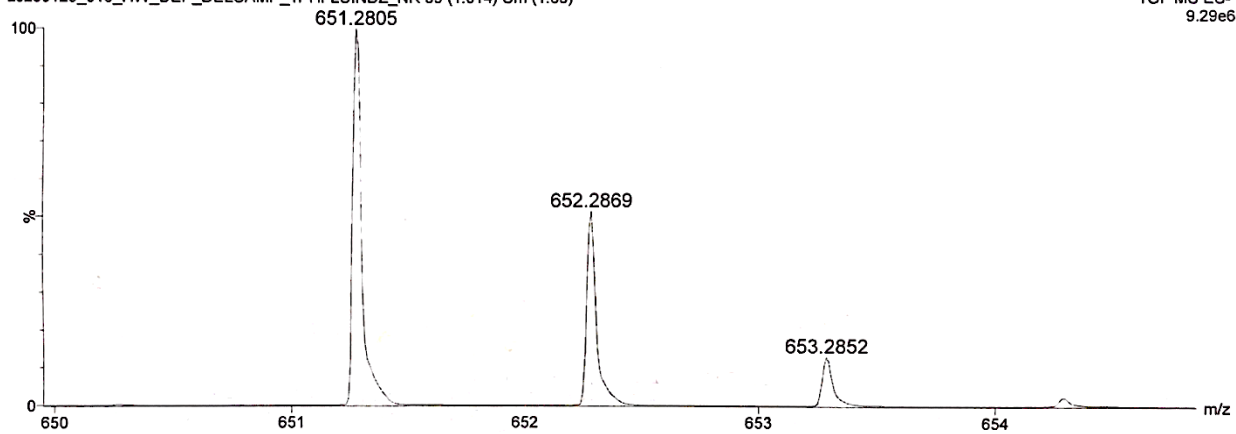

Figure S66. HRMS of <sup>1</sup>PhFluIndz.

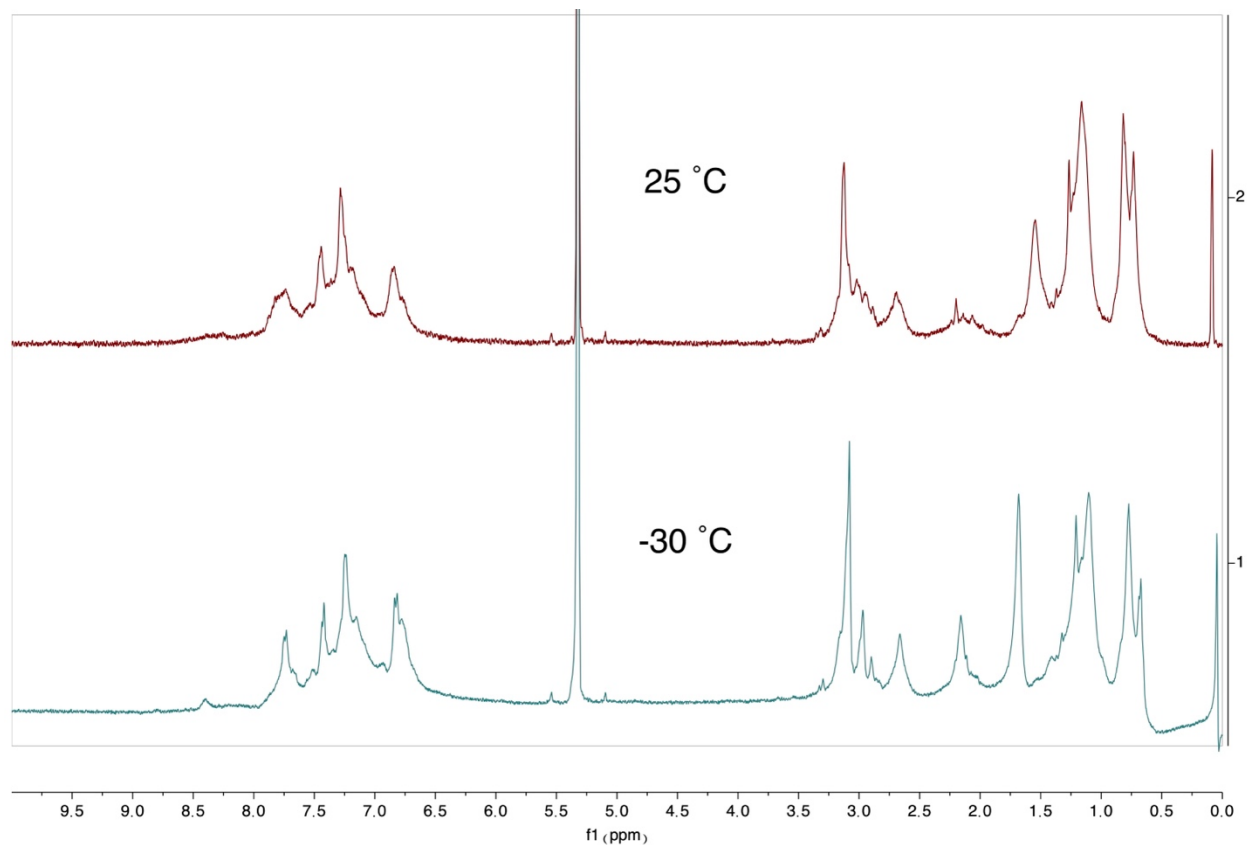

**Figure S67.** <sup>1</sup>H NMR (400 MHz) of <sup>7</sup>DMAFluIndz in CD<sub>2</sub>Cl<sub>2</sub> at room temperature (25 °C, top) and at -30 °C (bottom) showing no discernable improvement in resolution at the lower limit of our instrumentation in terms of temperature.

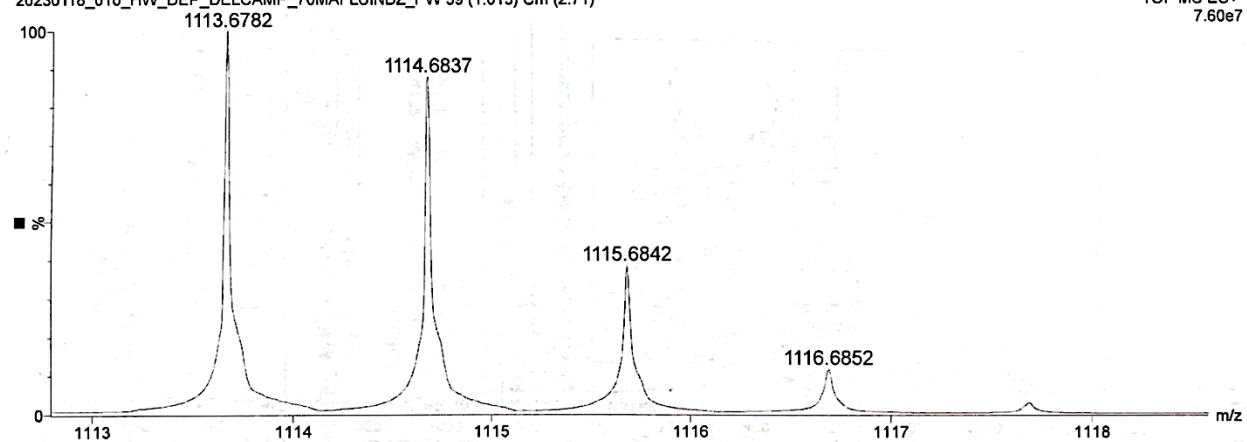

Figure S68. HRMS of <sup>7</sup>DMA FluIndz.

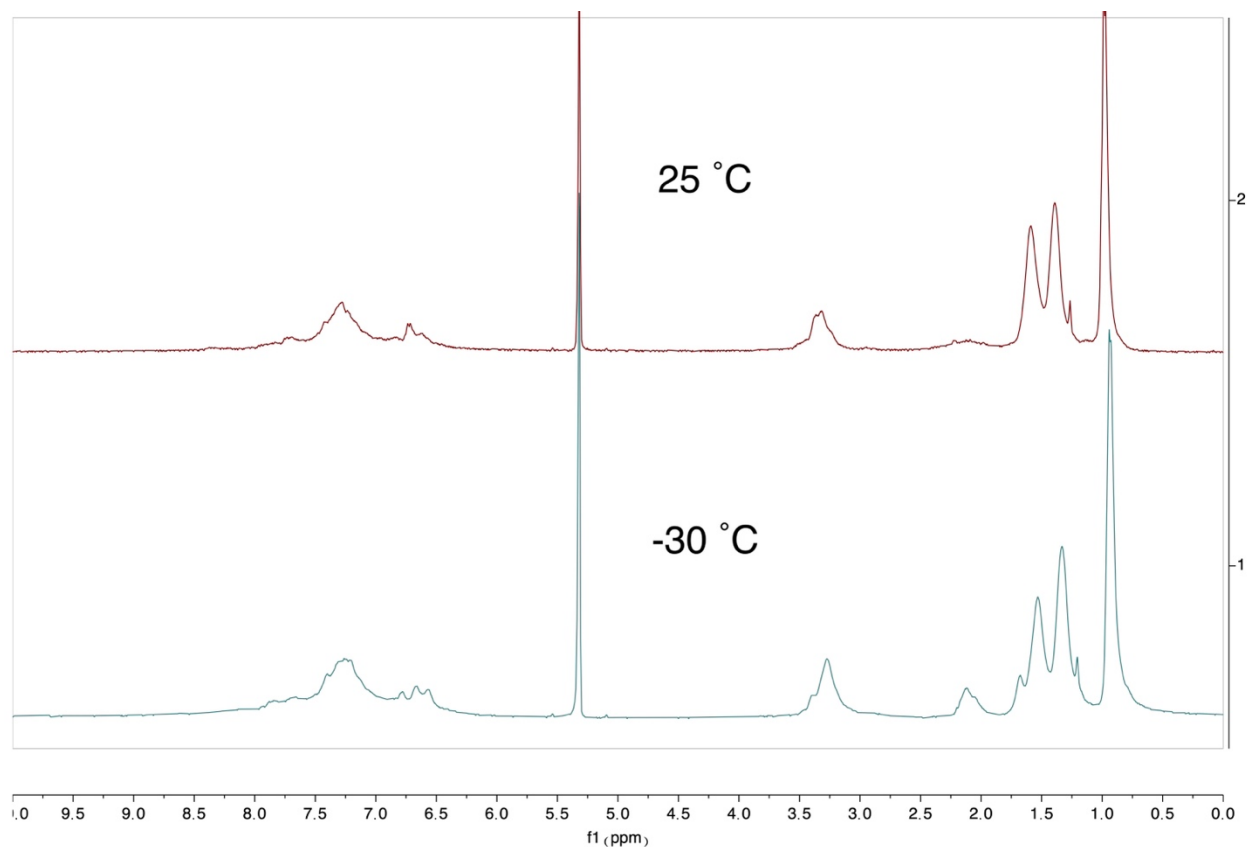

**Figure S69.** <sup>1</sup>H NMR (400 MHz) of <sup>1,7</sup>DBA-FluIndz in CD<sub>2</sub>Cl<sub>2</sub> at room temperature (25 °C, top) and at -30 °C (bottom) showing no discernable improvement in resolution at the lower limit of our instrumentation in terms of temperature.

17DBA\_FluIndz\_20230710042928 #130-136 RT: 0.30-0.32 AV: 7 NL:  
T: FTMS + p ESI Full ms [700.0000-1500.0000]

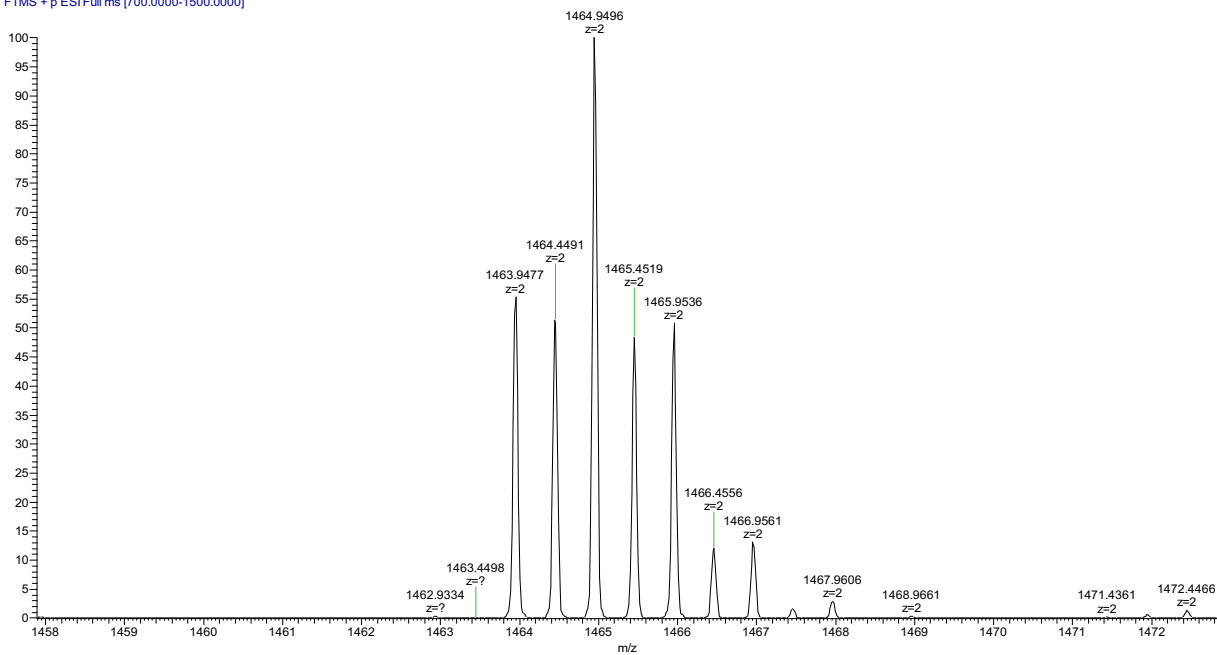

**Figure S70.** HRMS of <sup>1,7</sup>DBAFluIndz.

## REFERENCES

1. N. G. Connelly and W. E. Geiger, *Chem. Rev.*, 1996, **96**, 877–910.
2. R. D. Foltz, *Handbook of Physics and Chemistry*, CRC Press, Boca Raton, FL, 63rd edn., 1982.
3. N. Ree, C. L. Andersen, M. D. Kilde, O. Hammerich, M. B. Nielsen and K. V. Mikkelsen, *Phys. Chem. Chem. Phys.*, 2018, **20**, 7438–7446.
4. H. Li, X. Wang, X. Li, S. Zeng and G. Chen, *Chem. Mater.*, 2020, **32**, 3365–3375.
5. J. B. Barton, J. C. Demro, R. Amber, G. Gasparian and M. Lange, *Defense Public Release: Technical Report*, 1998, ADA399438.
6. B. Chen, Y. Chen and Z. Deng, *Photonics*, 2021, **8**, 14.
7. H. Wen and E. Bellotti, *Journal of Applied Physics*, 2016, **119**, 205702.
8. Y. Yang, Y. H. Zhang, W. Z. Shen and H. C. Liu, *Progress in Quantum Electronics*, 2011, **35**, 77–108.
9. S. Chinnathambi and N. Shirahata, *Science and Technology of Advanced Materials*, 2019, **20**, 337–355.
10. V. Pejovic, E. Georgitzikis, J. Lee, I. Lieberman, D. Cheyins, P. Heremans and P. E. Malinowski, *IEEE Trans. Electron Devices*, 2022, **69**, 2840–2850.
11. K. Ba and J. Wang, *Materials Today*, 2022, **58**, 119–134.
12. M. Grzybowski, O. Morawski, K. Nowak and P. Garbacz, *Chem. Commun.*, 2022, **58**, 5455–5458.
13. W. E. Meador, E. Y. Lin, I. Lim, H. C. Friedman, D. Ndaleh, A. K. Shaik, N. I. Hammer, B. Yang, J. R. Caram, E. M. Sletten and J. H. Delcamp, *Nat. Chem.*, 2024, 1–9.
14. M.-H. Liu, Z. Zhang, Y.-C. Yang and Y.-H. Chan, *Angewandte Chemie International Edition*, 2021, **60**, 983–989.
15. Y. Yang, C. Sun, S. Wang, K. Yan, M. Zhao, B. Wu and F. Zhang, *Angew. Chem. Int. Ed.*, 2022, **61**, e202117436.
16. Y. Han, J. Zhu, S. Dong, Y. Eng, T. Tao, T. Y. Gopalakrishna and C. Chi, *Org. Lett.*, 2023, **25**, 3380–3385.
17. M. Imran, C. M. Wehrmann and M. S. Chen, *J. Am. Chem. Soc.*, 2020, **142**, 38–43.
18. C. M. Wehrmann, R. T. Charlton and M. S. Chen, *J. Am. Chem. Soc.*, 2019, **141**, 3240–3248.
19. Z. Wu, Y. Zhai, H. Kim, J. D. Azoulay and T. N. Ng, *Acc. Chem. Res.*, 2018, **51**, 3144–3153.
20. N. Li, Z. Lan, Y. S. Lau, J. Xie, D. Zhao and F. Zhu, *Adv. Sci.*, 2020, **7**, 2000444.
21. A. E. London, H. Chen, M. A. Sabuj, J. Tropp, M. Saghayezhian, N. Eedugurala, B. A. Zhang, Y. Liu, X. Gu, B. M. Wong, N. Rai, M. K. Bowman and J. D. Azoulay, *Science Advances*, 2019, **5**, eaav2336.
22. K. S. Mayer, D. J. Adams, N. Eedugurala, M. M. Lockart, P. Mahalingavelar, L. Huang, L. A. Galuska, E. R. King, X. Gu, M. K. Bowman and J. D. Azoulay, *Cell Reports Physical Science*, 2021, **2**, 100467.
